# Supplementary material for: PDGF Family Expression in Glioblastoma Multiforme: Data Compilation from Ivy Glioblastoma Atlas Project Database
Source: PubMed Central journal article supplement (PMC5681588; doi:10.1038/s41598-017-15045-w), 2017-11-10
Supplement: 41598_2017_15045_MOESM1_ESM.pdf [file 41598_2017_15045_MOESM1_ESM.pdf]

# PDGF Family Expression in Glioblastoma Multiforme: Data Compilation from Ivy Glioblastoma Atlas Project Database

Isabella Gomes Cantanhede, João Ricardo Mendes de Oliveira

**Supplementary Table S1:** Clinical and genomic details of all donors of the tumors analyzed in this study. Data compiled from the Ivy GAP Clinical and Genomic Database [ivygap.swedish.org/home].

| Patient ID                           | W1-1-1                                    | W2-1-1                    | W3-1-1                                                                         |
|--------------------------------------|-------------------------------------------|---------------------------|--------------------------------------------------------------------------------|
| <b>Patient Information</b>           |                                           |                           |                                                                                |
| Gender                               | Male                                      | Female                    | Female                                                                         |
| Age at Initial Diagnosis             | 67                                        | 65                        | 66                                                                             |
| Weight                               | 106.5 kg                                  | 62.9 kg                   | 50.5 kg                                                                        |
| Height                               | 180 cm                                    | 160 cm                    | 158.8 cm                                                                       |
| KPS                                  | 100                                       | 90                        | 100                                                                            |
| Mini Mental Status Exam Score        |                                           |                           |                                                                                |
| History of Seizures Since Last Visit | Yes                                       | Yes                       | No                                                                             |
| Neurologic Deficit                   | No                                        | No                        | Yes. Left                                                                      |
| Presentation Symptoms                | Six-week history of mental status changes | Seizure                   | Slurred speech, slight left facial droop, decreased grip strength to left hand |
| Time to Progression                  | 95 days                                   | 908 days                  | 328 days                                                                       |
| Overall Survival                     | 106 days                                  | 1096 days                 | 982 days                                                                       |
| Time to Last Follow-up               | NA                                        | NA                        | NA                                                                             |
| Cause Of Death                       | Tumor progression                         | Tumor progression         | Tumor progression                                                              |
| <b>Tumor Information</b>             |                                           |                           |                                                                                |
| <b>Tumor 1</b>                       |                                           |                           |                                                                                |
| Date (months from initial diagnosis) | 0                                         | 0                         | 0                                                                              |
| Diagnosis                            | Astrocytic tumor                          | Astrocytic tumor          | Astrocytic tumor                                                               |
| Grade                                | Glioblastoma WHO grade IV                 | Glioblastoma WHO grade IV | Glioblastoma WHO grade IV                                                      |
| Location                             | Right Temporal                            | Right Frontal             | Right Frontal                                                                  |
| <b>Tumor 2</b>                       |                                           |                           |                                                                                |
| Date (months from initial diagnosis) | 0                                         |                           | 18                                                                             |
| Diagnosis                            | Astrocytic tumor                          |                           | Astrocytic tumor                                                               |

| Grade                                 | Glioblastoma WHO grade IV |                      | Glioblastoma WHO grade IV |
|---------------------------------------|---------------------------|----------------------|---------------------------|
| Location                              | Right Frontal             |                      | Right Temporal            |
| <b>Medications</b>                    |                           |                      |                           |
| <b>Medication 1</b>                   |                           |                      |                           |
| Category                              | Anti-epileptic            | Anti-epileptic       | Steroids                  |
| Drug Name                             | Fosphenytoin              | Levetiracetam        | Dexamethasone             |
| Start (months from initial diagnosis) | -1                        | -1                   | -1                        |
| Total Daily Dosage                    | 300-400 mg                | 1000 mg              | 1-12mg                    |
| End (months from initial diagnosis)   | 0                         | 36                   | 32                        |
| <b>Medication 2</b>                   |                           |                      |                           |
| Category                              | Anti-epileptic            | Steroids             | Anti-epileptic            |
| Drug Name                             | Levetiracetam             | Dexamethasone        | Levetiracetam             |
| Start (months from initial diagnosis) | 0                         | -1                   | -1                        |
| Total Daily Dosage                    | 3000 mg                   | 1-2mg                | 500-2000mg                |
| End (months from initial diagnosis)   | 3                         | 3                    | 32                        |
| <b>Medication 3</b>                   |                           |                      |                           |
| Category                              | Steroids                  | Cholesterol lowering | Antihypertensive          |
| Drug Name                             | Dexamethasone             | Gemfibrozil          | Digoxin                   |
| Start (months from initial diagnosis) | 0                         | -1                   | 0                         |
| Total Daily Dosage                    | 2-16 mg                   | 1200mg               | 125mg                     |
| End (months from initial diagnosis)   | 3                         | 5                    | 14                        |
| <b>Medication 4</b>                   |                           |                      |                           |
| Category                              | Anti-epileptic            |                      | Antihypertensive          |
| Drug Name                             | Fosphenytoin              |                      | Diltiazem                 |
| Start (months from initial diagnosis) | 0                         |                      | 0                         |
| Total Daily Dosage                    | 1500 mg ONE TIME          |                      | 60mg                      |
| End (months from initial diagnosis)   | 0                         |                      | 3                         |
| <b>Medication 5</b>                   |                           |                      |                           |
| Category                              |                           |                      | Cardiotonic               |
| Drug Name                             |                           |                      | Enalapril                 |
| Start (months from initial diagnosis) |                           |                      | 0                         |
| Total Daily Dosage                    |                           |                      | 10mg                      |
| End (months from initial diagnosis)   |                           |                      | 26                        |
| <b>Medication 6</b>                   |                           |                      |                           |
| Category                              |                           |                      | Anti-depressant           |

|                                                 |     |     |                  |
|-------------------------------------------------|-----|-----|------------------|
| Drug Name                                       |     |     | Quetiapine       |
| Start (months from initial diagnosis)           |     |     | 2                |
| Total Daily Dosage                              |     |     | 25mg             |
| End (months from initial diagnosis)             |     |     | 4                |
| <b>Medication 7</b>                             |     |     |                  |
| Category                                        |     |     | Antihypertensive |
| Drug Name                                       |     |     | Amlodipine       |
| Start (months from initial diagnosis)           |     |     | 13               |
| Total Daily Dosage                              |     |     | 10mg             |
| End (months from initial diagnosis)             |     |     | 24               |
| <b>Medication 8</b>                             |     |     |                  |
| Category                                        |     |     | Antihypertensive |
| Drug Name                                       |     |     | Amlodipine       |
| Start (months from initial diagnosis)           |     |     | 18               |
| Total Daily Dosage                              |     |     | 10mg             |
| End (months from initial diagnosis)             |     |     | 18               |
| <b>Medication 9</b>                             |     |     |                  |
| Category                                        |     |     | Antihypertensive |
| Drug Name                                       |     |     | Verapamil        |
| Start (months from initial diagnosis)           |     |     | 22               |
| Total Daily Dosage                              |     |     | 180-240mg        |
| End (months from initial diagnosis)             |     |     | 32               |
| <b>Medication 10</b>                            |     |     |                  |
| Category                                        |     |     | Antihypertensive |
| Drug Name                                       |     |     | Verapamil        |
| Start (months from initial diagnosis)           |     |     | 26               |
| Total Daily Dosage                              |     |     | 80mg (one time)  |
| End (months from initial diagnosis)             |     |     | 26               |
| <b>Surgery</b>                                  |     |     |                  |
| <b>Surgery 1</b>                                |     |     |                  |
| Date of Surgery (months from initial diagnosis) | 0   | 0   | 0                |
| Gliadel                                         | No  | No  | No               |
| Awake mapping                                   | No  | No  | Yes              |
| Stealth scan                                    | Yes | Yes | Yes              |

|                                                 |                           |                           |                           |
|-------------------------------------------------|---------------------------|---------------------------|---------------------------|
| <b>Surgery 2</b>                                |                           |                           |                           |
| Date of Surgery (months from initial diagnosis) |                           |                           | 18                        |
| Gliadel                                         |                           |                           | Yes                       |
| Awake mapping                                   |                           |                           | Yes                       |
| Stealth scan                                    |                           |                           | Yes                       |
| <b>Tissue Diagnosis</b>                         |                           |                           |                           |
| <b>Tissue 1</b>                                 |                           |                           |                           |
| Serial Number                                   | W1-1-1, SN154-1           | W2-1-1, SN156             | W3-1-1, SN159             |
| Diagnosis                                       | Glioblastoma WHO grade IV | Glioblastoma WHO grade IV | Glioblastoma WHO grade IV |
| Location                                        | Right Temporal            | Right Frontal             | Right Frontal             |
| Extent                                          | Complete resection        | Complete resection        | Complete resection        |
| MRI confirmation                                | Yes                       | Yes                       | Yes                       |
| <b>Tissue 2</b>                                 |                           |                           |                           |
| Serial Number                                   | W1-1-2, SN154-5           |                           | SN236, W3-2-1             |
| Diagnosis                                       | Glioblastoma WHO grade IV |                           | Glioblastoma WHO grade IV |
| Location                                        | Right Frontal             |                           | Right Temporal            |
| Extent                                          | Complete resection        |                           | Complete resection        |
| MRI confirmation                                | Yes                       |                           | Yes                       |
| <b>Chemotherapy</b>                             |                           |                           |                           |
| <b>Medication 1</b>                             |                           |                           |                           |
| Drug Name                                       | Temozolomide              | Temozolomide              | Temozolomide              |
| Start (months from initial diagnosis)           | 0                         | 1                         | 0                         |
| Dosage                                          | 140mg                     | 330mg                     | 105mg                     |
| End (months from initial diagnosis)             | 2                         | 2                         | 2                         |
| Description                                     | Concurrent                | Concurrent                | Concurrent                |
| <b>Medication 2</b>                             |                           |                           |                           |
| Drug Name                                       |                           | Temozolomide              | Temozolomide              |
| Start (months from initial diagnosis)           |                           | 3                         | 4                         |
| Dosage                                          |                           | 250mg                     | 215mg                     |
| End (months from initial diagnosis)             |                           | 7                         | 8                         |

|                                       |          |                    |                                 |
|---------------------------------------|----------|--------------------|---------------------------------|
| Description                           |          | maintenance 5x/mo. | Maintenance<br>5d/monthx8cycles |
| <b>Medication 3</b>                   |          |                    |                                 |
| Drug Name                             |          | Temozolomide       | Temozolomide                    |
| Start (months from initial diagnosis) |          | 9                  | 8                               |
| Dosage                                |          | 250mg              | 105mg                           |
| End (months from initial diagnosis)   |          |                    | 11                              |
| Description                           |          | maintenance 5x/mo. | 21 day cycles                   |
| <b>Medication 4</b>                   |          |                    |                                 |
| Drug Name                             |          |                    | XL-184                          |
| Start (months from initial diagnosis) |          |                    | 11                              |
| Dosage                                |          |                    |                                 |
| End (months from initial diagnosis)   |          |                    | 12                              |
| Description                           |          |                    |                                 |
| <b>Medication 5</b>                   |          |                    |                                 |
| Drug Name                             |          |                    | Temozolomide                    |
| Start (months from initial diagnosis) |          |                    | 22                              |
| Dosage                                |          |                    | 100mg QD                        |
| End (months from initial diagnosis)   |          |                    | 25                              |
| Description                           |          |                    | 21 day cycles                   |
| <b>Medication 6</b>                   |          |                    |                                 |
| Drug Name                             |          |                    | Avastin                         |
| Start (months from initial diagnosis) |          |                    | 25                              |
| Dosage                                |          |                    | 475mg                           |
| End (months from initial diagnosis)   |          |                    | 31                              |
| Description                           |          |                    |                                 |
| <b>Radiation Therapy</b>              |          |                    |                                 |
| <b>Medication 1</b>                   |          |                    |                                 |
| Type                                  | WBRT     | IMRT               | IMRT                            |
| Start (months from initial diagnosis) | 0        | 1                  | 0                               |
| Dosage                                | 5000 cGy | 4600 cGy           | 4500 cGy                        |
| End (months from initial diagnosis)   | 1        | 2                  | 2                               |
| Description                           |          | Concurrent         |                                 |

|                                                   |                                                  |                                                  |                                                  |
|---------------------------------------------------|--------------------------------------------------|--------------------------------------------------|--------------------------------------------------|
| Fraction                                          |                                                  | 23                                               | 25                                               |
| <b>Medication 2</b>                               |                                                  |                                                  |                                                  |
| Type                                              | WBRT                                             | IMRT                                             | Stereotactic                                     |
| Start (months from initial diagnosis)             | 1                                                | 2                                                | 10                                               |
| Dosage                                            | 800 cGy                                          | 1400 cGy                                         | 2647 cGy                                         |
| End (months from initial diagnosis)               | 2                                                | 2                                                | 10                                               |
| Description                                       | Boost                                            | Concurrent Boost                                 |                                                  |
| Fraction                                          |                                                  | 7                                                | 1                                                |
| <b>Medication 3</b>                               |                                                  |                                                  |                                                  |
| Type                                              |                                                  |                                                  | Stereotactic                                     |
| Start (months from initial diagnosis)             |                                                  |                                                  | 20                                               |
| Dosage                                            |                                                  |                                                  | 2000 cGy                                         |
| End (months from initial diagnosis)               |                                                  |                                                  | 20                                               |
| Description                                       |                                                  |                                                  |                                                  |
| Fraction                                          |                                                  |                                                  | 5                                                |
| <b>Pathology</b>                                  |                                                  |                                                  |                                                  |
| <b>Surgery 1</b>                                  |                                                  |                                                  |                                                  |
| Date Of Report<br>(months from initial diagnosis) | 0                                                | 0                                                | 0                                                |
| <b>Report</b>                                     |                                                  |                                                  |                                                  |
| Location                                          | Tissue: W1-1-1, SN154-1                          | Tissue: W2-1-1, SN156                            | Tissue: W3-1-1, SN159                            |
| Histopathology                                    | Glioblastoma, WHO grade<br>IV View Slides: A B C | Glioblastoma, WHO grade<br>IV View Slides: A B C | Glioblastoma, WHO grade<br>IV View Slides: A B C |
| 1p19q_deletion                                    | negative                                         | positive                                         | Negative                                         |
| EGFR                                              | amplification                                    | amplification                                    | amplification                                    |
| PTEN                                              | deletion                                         | loss                                             | loss                                             |
| MGMT PCR                                          | unmethylated                                     | methylated                                       | unmethylated                                     |
| MGMT IHC                                          | 40% View Slides: A                               | negative                                         | 30% View Slides: A                               |
| MGMT MS-MLPA:R1                                   | unmethylated (0.15)                              | methylated (0.312906321)                         | unmethylated<br>(0.253645289)                    |
| MGMT MS-MLPA:R2                                   | unmethylated (0.1)                               | methylated (0.710814512)                         | unmethylated<br>(0.047337683)                    |
| MGMT MS-MLPA:R3                                   | unmethylated (0.07)                              | methylated (0.723082006)                         | unmethylated<br>(0.039502756)                    |
| IDH1 mutation                                     | wildtype                                         | wildtype                                         | wildtype                                         |

|                                                   |                                               |              |                                                                |
|---------------------------------------------------|-----------------------------------------------|--------------|----------------------------------------------------------------|
| EGFR vIII                                         | not detected                                  | not detected | detected                                                       |
| <b>Surgery 2</b>                                  |                                               |              |                                                                |
| Date Of Report<br>(months from initial diagnosis) |                                               |              | 18                                                             |
| <b>Report</b>                                     |                                               |              |                                                                |
| Location                                          |                                               |              | Tissue: SN236, W3-2-1                                          |
| Histopathology                                    |                                               |              | recurrent/residual glioblastoma, WHO grade IV                  |
| 1p19q_deletion                                    |                                               |              |                                                                |
| EGFR                                              |                                               |              |                                                                |
| PTEN                                              |                                               |              |                                                                |
| MGMT PCR                                          |                                               |              | unmethylated                                                   |
| MGMT IHC                                          |                                               |              | 20%                                                            |
| MGMT MS-MLPA:R1                                   |                                               |              | methylated (0.39)                                              |
| MGMT MS-MLPA:R2                                   |                                               |              | unmethylated (0.06)                                            |
| MGMT MS-MLPA:R3                                   |                                               |              | unmethylated (0.03)                                            |
| IDH1 mutation                                     |                                               |              |                                                                |
| EGFR vIII                                         |                                               |              | detected                                                       |
| <b>Follow-up Clinic Visit</b>                     |                                               |              |                                                                |
| <b>Visit 1</b>                                    |                                               |              |                                                                |
| Date of Visit (months from initial diagnosis)     | <i>Patient has no follow-up clinic visits</i> | 3            | 0                                                              |
| KPS                                               |                                               | 70 (?)       |                                                                |
| Mini Mental Status Exam Score                     |                                               |              | 27                                                             |
| History of seizures since last visit              |                                               | No           | No                                                             |
| Neurologic Deficit                                |                                               | No           | No                                                             |
| Symptoms Notes                                    |                                               |              | Poor concentration, slowed cognition, hallucinations, falls x3 |
| <b>Visit 2</b>                                    |                                               |              |                                                                |
| Date of Visit (months from initial diagnosis)     |                                               | 5            | 2                                                              |
| KPS                                               |                                               |              | 90                                                             |
| Mini Mental Status Exam Score                     |                                               | 16           |                                                                |
| History of seizures since last visit              |                                               | No           | No                                                             |

|                                               |  |                                                                                                |                                                                                                                                                     |
|-----------------------------------------------|--|------------------------------------------------------------------------------------------------|-----------------------------------------------------------------------------------------------------------------------------------------------------|
| Neurologic Deficit                            |  | No                                                                                             | No                                                                                                                                                  |
| Symptoms Notes                                |  | cognitive slowing, likely due to bifrontal lobe dysfunction and side effects from temozolomide | Some persistent numbness in her left hand starting about two weeks after surgery, but this has been stable.                                         |
| <b>Visit 3</b>                                |  |                                                                                                |                                                                                                                                                     |
| Date of Visit (months from initial diagnosis) |  | 7                                                                                              | 4                                                                                                                                                   |
| KPS                                           |  |                                                                                                | 90                                                                                                                                                  |
| Mini Mental Status Exam Score                 |  | 21                                                                                             | 30                                                                                                                                                  |
| History of seizures since last visit          |  | No                                                                                             | No                                                                                                                                                  |
| Neurologic Deficit                            |  | No                                                                                             | No                                                                                                                                                  |
| Symptoms Notes                                |  | Decreased Motivation                                                                           | The first cycle of adjuvant temozolomide chemotherapy was tolerated poorly with abdominal pain, fairly significant nausea, and general ill feeling. |
| <b>Visit 4</b>                                |  |                                                                                                |                                                                                                                                                     |
| Date of Visit (months from initial diagnosis) |  | 9                                                                                              | 4                                                                                                                                                   |
| KPS                                           |  |                                                                                                | 90                                                                                                                                                  |
| Mini Mental Status Exam Score                 |  | 19                                                                                             |                                                                                                                                                     |
| History of seizures since last visit          |  | No                                                                                             | Yes                                                                                                                                                 |
| Neurologic Deficit                            |  | No                                                                                             | No                                                                                                                                                  |
| Symptoms Notes                                |  | Occasional abnormal thoughts including hallucinations                                          | Prominent nausea during cycle 1 of postradiation Temodar. Other than that, she is clinically stable                                                 |
| <b>Visit 5</b>                                |  |                                                                                                |                                                                                                                                                     |
| Date of Visit (months from initial diagnosis) |  | 11                                                                                             | 6                                                                                                                                                   |
| KPS                                           |  |                                                                                                | 100                                                                                                                                                 |



|                                               |  |                                                                                                                                               |                                               |
|-----------------------------------------------|--|-----------------------------------------------------------------------------------------------------------------------------------------------|-----------------------------------------------|
| Mini Mental Status Exam Score                 |  | 21                                                                                                                                            | 29                                            |
| History of seizures since last visit          |  | No                                                                                                                                            | No                                            |
| Neurologic Deficit                            |  | No                                                                                                                                            | No                                            |
| Symptoms Notes                                |  | She has had some mild decrease in her endurance.                                                                                              | There have been no significant new problems.  |
| <b>Visit 6</b>                                |  |                                                                                                                                               |                                               |
| Date of Visit (months from initial diagnosis) |  | 13                                                                                                                                            | 7                                             |
| KPS                                           |  |                                                                                                                                               | 100                                           |
| Mini Mental Status Exam Score                 |  | 20                                                                                                                                            | 30                                            |
| History of seizures since last visit          |  | No                                                                                                                                            | No                                            |
| Neurologic Deficit                            |  | Yes. Left.                                                                                                                                    | No                                            |
| Symptoms Notes                                |  | Gradual deterioration in gait function and some very mild weakness in her left lower extremity. <b>OBS:</b> patient unable to complete MMSE   | No significant new problems since last visit. |
| <b>Visit 7</b>                                |  |                                                                                                                                               |                                               |
| Date of Visit (months from initial diagnosis) |  | 15                                                                                                                                            | 7                                             |
| KPS                                           |  |                                                                                                                                               | 100                                           |
| Mini Mental Status Exam Score                 |  | 19                                                                                                                                            | 30                                            |
| History of seizures since last visit          |  | No                                                                                                                                            | No                                            |
| Neurologic Deficit                            |  | No                                                                                                                                            | No                                            |
| Symptoms Notes                                |  | Gait has continued to be somewhat of a problem, but is fluctuating substantially where she has some very good days and some rather poor days. | No new problems to report.                    |
| <b>Visit 8</b>                                |  |                                                                                                                                               |                                               |
| Date of Visit (months from initial diagnosis) |  | 18                                                                                                                                            | 8                                             |
| KPS                                           |  |                                                                                                                                               | 100                                           |

|                                               |  |                                                                                                                                                                                                                                                                                                                                                                                                              |                                    |
|-----------------------------------------------|--|--------------------------------------------------------------------------------------------------------------------------------------------------------------------------------------------------------------------------------------------------------------------------------------------------------------------------------------------------------------------------------------------------------------|------------------------------------|
| Mini Mental Status Exam Score                 |  | 22                                                                                                                                                                                                                                                                                                                                                                                                           | 30                                 |
| History of seizures since last visit          |  | No                                                                                                                                                                                                                                                                                                                                                                                                           | No                                 |
| Neurologic Deficit                            |  | No                                                                                                                                                                                                                                                                                                                                                                                                           | No                                 |
| Symptoms Notes                                |  | Slight further deterioration in her walking.                                                                                                                                                                                                                                                                                                                                                                 | No new problems to report.         |
| <b>Visit 9</b>                                |  |                                                                                                                                                                                                                                                                                                                                                                                                              |                                    |
| Date of Visit (months from initial diagnosis) |  | 21                                                                                                                                                                                                                                                                                                                                                                                                           | 10                                 |
| KPS                                           |  |                                                                                                                                                                                                                                                                                                                                                                                                              |                                    |
| Mini Mental Status Exam Score                 |  | 17                                                                                                                                                                                                                                                                                                                                                                                                           | 30                                 |
| History of seizures since last visit          |  | No                                                                                                                                                                                                                                                                                                                                                                                                           | No                                 |
| Neurologic Deficit                            |  | No                                                                                                                                                                                                                                                                                                                                                                                                           | No                                 |
| Symptoms Notes                                |  | Comes in today with a new MRI. Neurologically she continues to have a slow gradual decline. She continues to be pleasantly confused. She is having increase lower extremity weakness and some days is unable to walk. She denies any headaches or seizures. She denies any pain. She does have some fatigue and this is when her walking deteriorates. All other systems are negative except as noted above. | She has no new problems to report. |
| <b>Visit 10</b>                               |  |                                                                                                                                                                                                                                                                                                                                                                                                              |                                    |
| Date of Visit (months from initial diagnosis) |  | 29                                                                                                                                                                                                                                                                                                                                                                                                           | 11                                 |
| KPS                                           |  |                                                                                                                                                                                                                                                                                                                                                                                                              | 90                                 |
| Mini Mental Status Exam Score                 |  | 15                                                                                                                                                                                                                                                                                                                                                                                                           |                                    |
| History of seizures since last visit          |  | No                                                                                                                                                                                                                                                                                                                                                                                                           | No                                 |

|                                               |  |                                                                                                                                                        |                                                                                                                                     |
|-----------------------------------------------|--|--------------------------------------------------------------------------------------------------------------------------------------------------------|-------------------------------------------------------------------------------------------------------------------------------------|
| Neurologic Deficit                            |  | No                                                                                                                                                     | No                                                                                                                                  |
| Symptoms Notes                                |  | Gradual deterioration in neurologic function, most notably in terms of motivation and gait; gradual progression of bilateral frontal lobe dysfunction. | Her energy is improving since decline following radiation 4 months ago. Continues to be quite active.                               |
| <b>Visit 11</b>                               |  |                                                                                                                                                        |                                                                                                                                     |
| Date of Visit (months from initial diagnosis) |  |                                                                                                                                                        | 11                                                                                                                                  |
| KPS                                           |  |                                                                                                                                                        | 90                                                                                                                                  |
| Mini Mental Status Exam Score                 |  |                                                                                                                                                        |                                                                                                                                     |
| History of seizures since last visit          |  |                                                                                                                                                        | No                                                                                                                                  |
| Neurologic Deficit                            |  |                                                                                                                                                        | No                                                                                                                                  |
| Symptoms Notes                                |  |                                                                                                                                                        | She is having some nausea and anorexia as the side effect of the XL184.                                                             |
| <b>Visit 12</b>                               |  |                                                                                                                                                        |                                                                                                                                     |
| Date of Visit (months from initial diagnosis) |  |                                                                                                                                                        | 12                                                                                                                                  |
| KPS                                           |  |                                                                                                                                                        | 90                                                                                                                                  |
| Mini Mental Status Exam Score                 |  |                                                                                                                                                        | 30                                                                                                                                  |
| History of seizures since last visit          |  |                                                                                                                                                        | No                                                                                                                                  |
| Neurologic Deficit                            |  |                                                                                                                                                        | No                                                                                                                                  |
| Symptoms Notes                                |  |                                                                                                                                                        | Over the past week off medication she has had significant improvement in nausea, vomiting, and diarrhea. Her headache has improved. |
| <b>Visit 13</b>                               |  |                                                                                                                                                        |                                                                                                                                     |
| Date of Visit (months from initial diagnosis) |  |                                                                                                                                                        | 15                                                                                                                                  |
| KPS                                           |  |                                                                                                                                                        | 90                                                                                                                                  |

|                                               |  |  |                                                                                                                                |
|-----------------------------------------------|--|--|--------------------------------------------------------------------------------------------------------------------------------|
| Mini Mental Status Exam Score                 |  |  |                                                                                                                                |
| History of seizures since last visit          |  |  | No                                                                                                                             |
| Neurologic Deficit                            |  |  | No                                                                                                                             |
| Symptoms Notes                                |  |  | She had come off the investigational XL 184 agent because of side effects. She is now been on observation and is feeling well. |
| <b>Visit 14</b>                               |  |  |                                                                                                                                |
| Date of Visit (months from initial diagnosis) |  |  | 17                                                                                                                             |
| KPS                                           |  |  |                                                                                                                                |
| Mini Mental Status Exam Score                 |  |  | 30                                                                                                                             |
| History of seizures since last visit          |  |  | Yes                                                                                                                            |
| Neurologic Deficit                            |  |  | No                                                                                                                             |
| Symptoms Notes                                |  |  | She is now in the observation phase and is doing well with no headaches or seizures.                                           |
| <b>Visit 15</b>                               |  |  |                                                                                                                                |
| Date of Visit (months from initial diagnosis) |  |  | 17                                                                                                                             |
| KPS                                           |  |  |                                                                                                                                |
| Mini Mental Status Exam Score                 |  |  | 30                                                                                                                             |
| History of seizures since last visit          |  |  | No                                                                                                                             |
| Neurologic Deficit                            |  |  | No                                                                                                                             |
| Symptoms Notes                                |  |  | She has no new problems to report.                                                                                             |
| <b>Visit 16</b>                               |  |  |                                                                                                                                |
| Date of Visit (months from initial diagnosis) |  |  | 18                                                                                                                             |
| KPS                                           |  |  | 90                                                                                                                             |
| Mini Mental Status Exam Score                 |  |  |                                                                                                                                |
| History of seizures since last visit          |  |  | No                                                                                                                             |

|                                               |  |  |                                                                                         |
|-----------------------------------------------|--|--|-----------------------------------------------------------------------------------------|
| Neurologic Deficit                            |  |  | No                                                                                      |
| Symptoms Notes                                |  |  | She has been doing well since I last saw her with no significant headaches or seizures. |
| <b>Visit 17</b>                               |  |  |                                                                                         |
| Date of Visit (months from initial diagnosis) |  |  | 18                                                                                      |
| KPS                                           |  |  | 90                                                                                      |
| Mini Mental Status Exam Score                 |  |  |                                                                                         |
| History of seizures since last visit          |  |  | No                                                                                      |
| Neurologic Deficit                            |  |  | No                                                                                      |
| Symptoms Notes                                |  |  | She has had no new problems.                                                            |
| <b>Visit 18</b>                               |  |  |                                                                                         |
| Date of Visit (months from initial diagnosis) |  |  | 20                                                                                      |
| KPS                                           |  |  | 90                                                                                      |
| Mini Mental Status Exam Score                 |  |  |                                                                                         |
| History of seizures since last visit          |  |  | No                                                                                      |
| Neurologic Deficit                            |  |  | No                                                                                      |
| Symptoms Notes                                |  |  | She has been doing well with no significant headaches or seizures.                      |
| <b>Visit 19</b>                               |  |  |                                                                                         |
| Date of Visit (months from initial diagnosis) |  |  | 22                                                                                      |
| KPS                                           |  |  | 90                                                                                      |
| Mini Mental Status Exam Score                 |  |  |                                                                                         |
| History of seizures since last visit          |  |  | No                                                                                      |
| Neurologic Deficit                            |  |  | No                                                                                      |

|                                               |  |  |                                                                                                                                                              |
|-----------------------------------------------|--|--|--------------------------------------------------------------------------------------------------------------------------------------------------------------|
| Symptoms Notes                                |  |  | Stable disease after CyberKnife treatment.                                                                                                                   |
| <b>Visit 20</b>                               |  |  |                                                                                                                                                              |
| Date of Visit (months from initial diagnosis) |  |  | 23                                                                                                                                                           |
| KPS                                           |  |  | 90                                                                                                                                                           |
| Mini Mental Status Exam Score                 |  |  |                                                                                                                                                              |
| History of seizures since last visit          |  |  | No                                                                                                                                                           |
| Neurologic Deficit                            |  |  | No                                                                                                                                                           |
| Symptoms Notes                                |  |  | Slight increase in thickness of enhancement along the anterior aspect of the resection cavity; however, overall there is no significant change in the study. |
| <b>Visit 21</b>                               |  |  |                                                                                                                                                              |
| Date of Visit (months from initial diagnosis) |  |  | 24                                                                                                                                                           |
| KPS                                           |  |  | 90                                                                                                                                                           |
| Mini Mental Status Exam Score                 |  |  |                                                                                                                                                              |
| History of seizures since last visit          |  |  | No                                                                                                                                                           |
| Neurologic Deficit                            |  |  | No                                                                                                                                                           |
| Symptoms Notes                                |  |  | Slight interval increase in the thickness of contrast enhancement around the margin of the resection cavity; minor, not conclusive of progressive disease.   |
| <b>Visit 22</b>                               |  |  |                                                                                                                                                              |
| Date of Visit (months from initial diagnosis) |  |  | 25                                                                                                                                                           |
| KPS                                           |  |  | 80                                                                                                                                                           |
| Mini Mental Status Exam Score                 |  |  |                                                                                                                                                              |
| History of seizures since last visit          |  |  | No                                                                                                                                                           |

|                                               |  |  |                                                                                                                                                                                                                                           |
|-----------------------------------------------|--|--|-------------------------------------------------------------------------------------------------------------------------------------------------------------------------------------------------------------------------------------------|
| Neurologic Deficit                            |  |  | No                                                                                                                                                                                                                                        |
| Symptoms Notes                                |  |  | Tumor is clearly showing progressive disease, halting TMZ and starting Avastin.                                                                                                                                                           |
| <b>Visit 23</b>                               |  |  |                                                                                                                                                                                                                                           |
| Date of Visit (months from initial diagnosis) |  |  | 26                                                                                                                                                                                                                                        |
| KPS                                           |  |  | 70                                                                                                                                                                                                                                        |
| Mini Mental Status Exam Score                 |  |  |                                                                                                                                                                                                                                           |
| History of seizures since last visit          |  |  | No                                                                                                                                                                                                                                        |
| Neurologic Deficit                            |  |  | Yes. Left side weakness.                                                                                                                                                                                                                  |
| Symptoms Notes                                |  |  | Sensory problems in the left side making it difficult for her to use her left arm or to walk without assistance.                                                                                                                          |
| <b>Visit 24</b>                               |  |  |                                                                                                                                                                                                                                           |
| Date of Visit (months from initial diagnosis) |  |  | 27                                                                                                                                                                                                                                        |
| KPS                                           |  |  | 70                                                                                                                                                                                                                                        |
| Mini Mental Status Exam Score                 |  |  |                                                                                                                                                                                                                                           |
| History of seizures since last visit          |  |  | No                                                                                                                                                                                                                                        |
| Neurologic Deficit                            |  |  | No                                                                                                                                                                                                                                        |
| Symptoms Notes                                |  |  | Recently admitted to the hospital because of hypertension and her blood pressures, now under control. No further episodes of sudden onset left-sided weakness, although still unable to detect sensation on the left side to light touch. |
| <b>Visit 25</b>                               |  |  |                                                                                                                                                                                                                                           |
| Date of Visit (months from initial diagnosis) |  |  | 27                                                                                                                                                                                                                                        |
| KPS                                           |  |  | 70                                                                                                                                                                                                                                        |

|                                               |  |  |                                                                                                                                                                               |
|-----------------------------------------------|--|--|-------------------------------------------------------------------------------------------------------------------------------------------------------------------------------|
| Mini Mental Status Exam Score                 |  |  |                                                                                                                                                                               |
| History of seizures since last visit          |  |  | No                                                                                                                                                                            |
| Neurologic Deficit                            |  |  | No                                                                                                                                                                            |
| Symptoms Notes                                |  |  | Early followup; potential toxicity after starting Trileptal. Dizziness, confusion, aphasic. CT scan revealed no acute findings, Trileptal discontinued. <b>OBS:</b> ER visit. |
| <b>Visit 26</b>                               |  |  |                                                                                                                                                                               |
| Date of Visit (months from initial diagnosis) |  |  | 29                                                                                                                                                                            |
| KPS                                           |  |  | 70                                                                                                                                                                            |
| Mini Mental Status Exam Score                 |  |  |                                                                                                                                                                               |
| History of seizures since last visit          |  |  | No                                                                                                                                                                            |
| Neurologic Deficit                            |  |  | No                                                                                                                                                                            |
| Symptoms Notes                                |  |  | She has no new problems to report. She continues to tolerate the every 2-week Avastin treatments well.                                                                        |
| <b>Visit 27</b>                               |  |  |                                                                                                                                                                               |
| Date of Visit (months from initial diagnosis) |  |  | 30                                                                                                                                                                            |
| KPS                                           |  |  | 70                                                                                                                                                                            |
| Mini Mental Status Exam Score                 |  |  |                                                                                                                                                                               |
| History of seizures since last visit          |  |  | No                                                                                                                                                                            |
| Neurologic Deficit                            |  |  | No                                                                                                                                                                            |
| Symptoms Notes                                |  |  | Some fluctuations in neurologic status, but overall has been doing well.                                                                                                      |
| <b>Clinical Trials</b>                        |  |  |                                                                                                                                                                               |



|   |    |    |                                                                |
|---|----|----|----------------------------------------------------------------|
| 1 | // | // | Exelixis, Relapsed Astrocytic Tumors with XL184 Regimen, 10041 |
| 2 |    |    | NovoCure                                                       |
| 3 |    |    |                                                                |

| Patient ID                           | W4-1-1                             | W5-1-1                                               | W6-1-1                                                                      |
|--------------------------------------|------------------------------------|------------------------------------------------------|-----------------------------------------------------------------------------|
| <b>Patient Information</b>           |                                    |                                                      |                                                                             |
| Gender                               | Female                             | Female                                               | Female                                                                      |
| Age at Initial Diagnosis             | 51                                 | 65                                                   | 73                                                                          |
| Weight                               | 86.183 kg                          | 85.3 kg                                              | 55.067 kg                                                                   |
| Height                               | 163.56 cm                          | 160 cm                                               | 162.6 cm                                                                    |
| KPS                                  | 90 (?)                             | 90 (?)                                               | 90 (?)                                                                      |
| Mini Mental Status Exam Score        | 30                                 |                                                      |                                                                             |
| History of Seizures Since Last Visit | No                                 | No                                                   | No                                                                          |
| Neurologic Deficit                   | Yes. Left.                         | Yes. Left facial droop and hand weakness.            | Yes. Right                                                                  |
| Presentation Symptoms                | Left-sided weakness 4/5, headache. | Weakness of left upper extremity, left facial droop. | Difficulty with reading comprehension and writing. Notes: visual field cut. |
| Time to Progression                  | 102 days                           | 115 days                                             | 107 days                                                                    |
| Overall Survival                     | 540 days                           | NA                                                   | 647 days                                                                    |
| Time to Last Follow-up               | NA                                 | 752 days                                             | NA                                                                          |
| Cause Of Death                       | Tumor progression                  | //                                                   | Tumor progression                                                           |
| <b>Tumor Information</b>             |                                    |                                                      |                                                                             |
| <b>Tumor 1</b>                       |                                    |                                                      |                                                                             |
| Date (months from initial diagnosis) | 0                                  | 0                                                    | 0                                                                           |
| Diagnosis                            | Astrocytic tumor                   | Astrocytic tumor                                     | Astrocytic tumor                                                            |
| Grade                                | Glioblastoma WHO grade IV          | Glioblastoma WHO grade IV                            | Glioblastoma WHO grade IV                                                   |
| Location                             | Right Frontal                      | Right Frontal                                        | Left Occipital                                                              |
| <b>Tumor 2</b>                       |                                    |                                                      |                                                                             |
| Date (months from initial diagnosis) | 3                                  |                                                      |                                                                             |
| Diagnosis                            | Astrocytic tumor                   |                                                      |                                                                             |
| Grade                                | Glioblastoma WHO grade IV          |                                                      |                                                                             |

|                                       |                 |                 |                  |
|---------------------------------------|-----------------|-----------------|------------------|
| Location                              | Right Frontal   |                 |                  |
| <b>Medications</b>                    |                 |                 |                  |
| <b>Medication 1</b>                   |                 |                 |                  |
| Category                              | Steroids        | Anti-epileptic  | Anti-epileptic   |
| Drug Name                             | Dexamethasone   | Levetiracetam   | Phenytoin        |
| Start (months from initial diagnosis) | -1              | 0               | 0                |
| Total Daily Dosage                    | 2-16mg          | 1500mg          | 200mg            |
| End (months from initial diagnosis)   | 16              | 4               | 3                |
| <b>Medication 2</b>                   |                 |                 |                  |
| Category                              | Anti-epileptic  | Steroids        | Steroids         |
| Drug Name                             | Fosphenytoin    | Dexamethasone   | Dexamethasone    |
| Start (months from initial diagnosis) | -1              | 0               | 0                |
| Total Daily Dosage                    | 100-300mg       | 2-16mg          | 12-16mg          |
| End (months from initial diagnosis)   | 0               | 1               | 3                |
| <b>Medication 3</b>                   |                 |                 |                  |
| Category                              | Anti-epileptic  | Anti-depressant | Anti-epileptic   |
| Drug Name                             | Phenytoin       | Citalopram      | Fosphenytoin     |
| Start (months from initial diagnosis) | -1              | 0               | 0                |
| Total Daily Dosage                    | 100mg           | 10mg            | 300mg            |
| End (months from initial diagnosis)   | 2               | 0               | 0                |
| <b>Medication 4</b>                   |                 |                 |                  |
| Category                              | Steroids        | Anti-epileptic  | Anti-epileptic   |
| Drug Name                             | Levetiracetam   | Divalproex      | Levetiracetam    |
| Start (months from initial diagnosis) | -1              | 4               | 9                |
| Total Daily Dosage                    | 1000-2000mg     | 500mg           | 1000mg           |
| End (months from initial diagnosis)   | 16              | 7               | 18               |
| <b>Medication 5</b>                   |                 |                 |                  |
| Category                              | Anti-depressant |                 | Antihypertensive |
| Drug Name                             | Citalopram      |                 | Amlodipine       |
| Start (months from initial diagnosis) | -1              |                 | 12               |
| Total Daily Dosage                    | 10-20mg         |                 | 5mg              |
| End (months from initial diagnosis)   | 17              |                 | 16               |
| <b>Medication 6</b>                   |                 |                 |                  |
| Category                              | Steroids        |                 | Anti-depressant  |
| Drug Name                             | Prednisone      |                 | Xanax            |

|                                                 |                           |                           |                           |
|-------------------------------------------------|---------------------------|---------------------------|---------------------------|
| Start (months from initial diagnosis)           | 8                         |                           | 14                        |
| Total Daily Dosage                              | 5mg                       |                           |                           |
| End (months from initial diagnosis)             | 11                        |                           | 18                        |
| <b>Medication 7</b>                             |                           |                           |                           |
| Category                                        | Antihypertensive          |                           |                           |
| Drug Name                                       | Losartan                  |                           |                           |
| Start (months from initial diagnosis)           | 9                         |                           |                           |
| Total Daily Dosage                              | 25mg                      |                           |                           |
| End (months from initial diagnosis)             | 17                        |                           |                           |
| <b>Medication 8</b>                             |                           |                           |                           |
| Category                                        | Steroids                  |                           |                           |
| Drug Name                                       | Prednisone                |                           |                           |
| Start (months from initial diagnosis)           | 11                        |                           |                           |
| Total Daily Dosage                              | 12.5-20mg                 |                           |                           |
| End (months from initial diagnosis)             | 17                        |                           |                           |
| <b>Surgery</b>                                  |                           |                           |                           |
| <b>Surgery 1</b>                                |                           |                           |                           |
| Date of Surgery (months from initial diagnosis) | 0                         | 0                         | 0                         |
| Gliadel                                         | No                        | No                        | No                        |
| Awake mapping                                   | Yes                       | Yes                       | No                        |
| Stealth scan                                    | Yes                       | Yes                       | Yes                       |
| <b>Surgery 2</b>                                |                           |                           |                           |
| Date of Surgery (months from initial diagnosis) | 3                         |                           |                           |
| Gliadel                                         | Yes                       |                           |                           |
| Awake mapping                                   | No                        |                           |                           |
| Stealth scan                                    | Yes                       |                           |                           |
| <b>Tissue Diagnosis</b>                         |                           |                           |                           |
| <b>Tissue 1</b>                                 |                           |                           |                           |
| Serial Number                                   | W4-1-1, SN160             | W5-1-1, SN161             | W6-1-1, SN162             |
| Diagnosis                                       | Glioblastoma WHO grade IV | Glioblastoma WHO grade IV | Glioblastoma WHO grade IV |
| Location                                        | Right Frontal             | Right Frontal             | Left Occipital            |
| Extent                                          | Complete resection        | Complete resection        | Complete resection        |

|                                       |                                  |                         |                   |
|---------------------------------------|----------------------------------|-------------------------|-------------------|
| MRI confirmation                      | Yes                              | Yes                     | Yes               |
| <b>Tissue 2</b>                       |                                  |                         |                   |
| Serial Number                         | W4-2-1, SN174                    |                         |                   |
| Diagnosis                             | Glioblastoma WHO grade IV        |                         |                   |
| Location                              | Right Frontal                    |                         |                   |
| Extent                                | Complete resection               |                         |                   |
| MRI confirmation                      | Yes                              |                         |                   |
| Notes                                 | may not be truly recurrent tumor |                         |                   |
| <b>Chemotherapy</b>                   |                                  |                         |                   |
| <b>Medication 1</b>                   |                                  |                         |                   |
| Drug Name                             | Temozolomide                     | Temozolomide            | Temozolomide      |
| Start (months from initial diagnosis) | 0                                | 1                       | 1                 |
| Dosage                                | 140mg/day                        | 140mg                   | 120mg/day         |
| End (months from initial diagnosis)   | 2                                | 2                       | 2                 |
| Description                           | concurrent                       | Concurrent              | Concurrent        |
| <b>Medication 2</b>                   |                                  |                         |                   |
| Drug Name                             | Temozolomide                     | Temozolomide            | Temozolomide      |
| Start (months from initial diagnosis) | 2                                | 3                       | 3                 |
| Dosage                                | 140mg/day                        | 180mg                   | 200mg/day         |
| End (months from initial diagnosis)   | 3                                | 4                       | 5                 |
| Description                           | maintenance                      | Maintenance 5days/month | Maintenance 5x/mo |
| <b>Medication 3</b>                   |                                  |                         |                   |
| Drug Name                             | Temozolomide                     | Temozolomide            | Avastin           |
| Start (months from initial diagnosis) | 4                                | 4                       | 5                 |
| Dosage                                | 100mg/day                        | 380mg                   |                   |
| End (months from initial diagnosis)   |                                  | 7                       |                   |
| Description                           | long-term                        | Maintenance 5days/month | 1x/2wks           |
| <b>Medication 4</b>                   |                                  |                         |                   |
| Drug Name                             | Avastin                          | XL-184                  |                   |
| Start (months from initial diagnosis) | 7                                | 7                       |                   |

|                                       |          |                |            |
|---------------------------------------|----------|----------------|------------|
| Dosage                                | 875mg    | 125mg          |            |
| End (months from initial diagnosis)   | 13       | 8              |            |
| Description                           |          | Clinical Trial |            |
| <b>Medication 5</b>                   |          |                |            |
| Drug Name                             |          | XL-184         |            |
| Start (months from initial diagnosis) |          | 8              |            |
| Dosage                                |          | 75mg           |            |
| End (months from initial diagnosis)   |          | 15             |            |
| Description                           |          | Clinical Trial |            |
| <b>Medication 6</b>                   |          |                |            |
| Drug Name                             |          | XL-184         |            |
| Start (months from initial diagnosis) |          | 15             |            |
| Dosage                                |          | 50mg           |            |
| End (months from initial diagnosis)   |          | 33             |            |
| Description                           |          | Clinical Trial |            |
| <b>Medication 7</b>                   |          |                |            |
| Drug Name                             |          | Avastin        |            |
| Start (months from initial diagnosis) |          | 27             |            |
| Dosage                                |          |                |            |
| End (months from initial diagnosis)   |          |                |            |
| Description                           |          | 1x/2wks        |            |
| <b>Radiation Therapy</b>              |          |                |            |
| <b>Medication 1</b>                   |          |                |            |
| Type                                  | IMRT     | IMRT           | IMRT       |
| Start (months from initial diagnosis) | 0        | 1              | 1          |
| Dosage                                | 4500 cGy | 4500 cGy       | 5940 cGy   |
| End (months from initial diagnosis)   | 2        | 2              | 2          |
| Description                           |          | 6 MV technique | Concurrent |
| Fraction                              | 25       | 25             | 33         |
| <b>Medication 2</b>                   |          |                |            |
| Type                                  | IMRT     | IMRT           |            |
| Start (months from initial diagnosis) | 0        | 2              |            |
| Dosage                                | 1080 cGy | 1440 cGy       |            |
| End (months from initial diagnosis)   | 2        | 2              |            |

| Description                                       | Reduced Field Boost           | Multiple Field Boost       |                               |
|---------------------------------------------------|-------------------------------|----------------------------|-------------------------------|
| Fraction                                          | 6                             | 8                          |                               |
| <b>Pathology</b>                                  |                               |                            |                               |
| <b>Surgery 1</b>                                  |                               |                            |                               |
| Date Of Report<br>(months from initial diagnosis) | 0                             | 0                          | 0                             |
| <b>Report</b>                                     |                               |                            |                               |
| Location                                          | Tissue: W4-1-1, SN160         | Tissue: W5-1-1, SN161      | Tissue: W6-1-1, SN162         |
| Histopathology                                    | Glioblastoma WHO grade IV     | Glioblastoma, WHO grade IV | Glioblastoma WHO grade IV     |
| 1p19q_deletion                                    | Normal                        | Normal                     | Normal                        |
| EGFR                                              | gain                          | amplification              | gain                          |
| PTEN                                              | deletion                      | loss                       | Normal                        |
| MGMT PCR                                          | unmethylated                  | unmethylated               | unmethylated                  |
| MGMT IHC                                          | 80%                           | 20% View Slides: A         | 90%                           |
| MGMT MS-MLPA:R1                                   | unmethylated<br>(0.252065773) | methylated (0.751090128)   | unmethylated<br>(0.193418734) |
| MGMT MS-MLPA:R2                                   | unmethylated<br>(0.037667297) | unmethylated (0)           | unmethylated<br>(0.047114023) |
| MGMT MS-MLPA:R3                                   | unmethylated<br>(0.010635661) | methylated (0.782615912)   | unmethylated<br>(0.019431304) |
| IDH1 mutation                                     | wildtype                      | wildtype                   | wildtype                      |
| EGFR vIII                                         | not detected                  | not detected               | not detected                  |
| <b>Surgery 2</b>                                  |                               |                            |                               |
| Date Of Report<br>(months from initial diagnosis) | 3                             |                            |                               |
| <b>Report</b>                                     |                               |                            |                               |
| Location                                          | Tissue: W4-2-1, SN174         |                            |                               |
| Histopathology                                    | Glioblastoma WHO grade IV     |                            |                               |
| 1p19q_deletion                                    |                               |                            |                               |
| EGFR                                              |                               |                            |                               |
| PTEN                                              |                               |                            |                               |
| MGMT PCR                                          | unmethylated                  |                            |                               |
| MGMT IHC                                          | 60%                           |                            |                               |

|                                               |                                                     |                                                                                                                     |                                     |
|-----------------------------------------------|-----------------------------------------------------|---------------------------------------------------------------------------------------------------------------------|-------------------------------------|
| MGMT MS-MLPA:R1                               | methylated (0.42)                                   |                                                                                                                     |                                     |
| MGMT MS-MLPA:R2                               | unmethylated (0.05)                                 |                                                                                                                     |                                     |
| MGMT MS-MLPA:R3                               | unmethylated (0.03)                                 |                                                                                                                     |                                     |
| IDH1 mutation                                 |                                                     |                                                                                                                     |                                     |
| EGFR vIII                                     |                                                     |                                                                                                                     |                                     |
| <b>Follow-up Clinic Visit</b>                 |                                                     |                                                                                                                     |                                     |
| <b>Visit 1</b>                                |                                                     |                                                                                                                     |                                     |
| Date of Visit (months from initial diagnosis) | 0                                                   | 2                                                                                                                   | 0                                   |
| KPS                                           | 90                                                  | 90                                                                                                                  | 90                                  |
| Mini Mental Status Exam Score                 |                                                     |                                                                                                                     |                                     |
| History of seizures since last visit          | No                                                  | No                                                                                                                  | No                                  |
| Neurologic Deficit                            | Yes. Left pronator drift.                           | Yes. Left hemiparesis.                                                                                              | Yes. Right homonymous hemianopia.   |
| Symptoms Notes                                | Fatigued, high fever; patient is depressed.         | Unscheduled visit because of vesicular rash.                                                                        | Difficulty with right-sided vision. |
| <b>Visit 2</b>                                |                                                     |                                                                                                                     |                                     |
| Date of Visit (months from initial diagnosis) | 1                                                   | 3                                                                                                                   | 3                                   |
| KPS                                           | 90                                                  | 60                                                                                                                  |                                     |
| Mini Mental Status Exam Score                 |                                                     | 28                                                                                                                  | 27                                  |
| History of seizures since last visit          | No                                                  | Yes                                                                                                                 | No                                  |
| Neurologic Deficit                            | No                                                  | Yes. Left hemiparesis.                                                                                              | Yes. Right homonymous hemianopia.   |
| Symptoms Notes                                | Right sided facial swelling, presthesias, headache. | Gradual, steady improvement in left lower extremity strength. Left arm is still very weak and functionally useless. | Fatigue.                            |
| <b>Visit 3</b>                                |                                                     |                                                                                                                     |                                     |
| Date of Visit (months from initial diagnosis) | 2                                                   | 4                                                                                                                   | 5                                   |
| KPS                                           | 90                                                  | 70                                                                                                                  | 70                                  |
| Mini Mental Status Exam Score                 |                                                     |                                                                                                                     | 17                                  |
| History of seizures since last visit          | No                                                  | No                                                                                                                  | No                                  |
| Neurologic Deficit                            | No                                                  | Yes. Left hemiparesis.                                                                                              | Yes. Right homonymous hemianopia.   |

|                                               |                                                                                                                          |                                                                      |                                                                                                                     |
|-----------------------------------------------|--------------------------------------------------------------------------------------------------------------------------|----------------------------------------------------------------------|---------------------------------------------------------------------------------------------------------------------|
| Symptoms Notes                                | Temodar radiation tolerated well. Decreased appetite, fatigue, night sweats.                                             | Keppra discontinued due to rash, risk of seizure possibly increased. | n/a                                                                                                                 |
| <b>Visit 4</b>                                |                                                                                                                          |                                                                      |                                                                                                                     |
| Date of Visit (months from initial diagnosis) | 3                                                                                                                        | 5                                                                    | 7                                                                                                                   |
| KPS                                           | 90                                                                                                                       | 70                                                                   |                                                                                                                     |
| Mini Mental Status Exam Score                 |                                                                                                                          | 29                                                                   | 25                                                                                                                  |
| History of seizures since last visit          | No                                                                                                                       | Yes                                                                  | No                                                                                                                  |
| Neurologic Deficit                            | No. Left weakness.                                                                                                       | Yes. Left hemiparesis.                                               | Yes. Right homonymous hemianopia.                                                                                   |
| Symptoms Notes                                | Temodar tolerated well. Energy is better, appetite is better. Sleeping better. Still weak on left side, right is better. | Functions improving gradually. Elevated LFTs, discontinue dapsone.   | Deteriorating language, speech is returning to baseline.                                                            |
| <b>Visit 5</b>                                |                                                                                                                          |                                                                      |                                                                                                                     |
| Date of Visit (months from initial diagnosis) | 4                                                                                                                        | 7                                                                    | 8                                                                                                                   |
| KPS                                           | 90                                                                                                                       |                                                                      | 80                                                                                                                  |
| Mini Mental Status Exam Score                 |                                                                                                                          | 28                                                                   |                                                                                                                     |
| History of seizures since last visit          | No                                                                                                                       | No                                                                   | No                                                                                                                  |
| Neurologic Deficit                            | No                                                                                                                       | Yes. Left hemiparesis.                                               | Yes. Right homonymous hemianopia.                                                                                   |
| Symptoms Notes                                | The patient had a repeat biopsy.                                                                                         | Slightly better control of left leg.                                 | Reading is still arduous, but spelling and writing are becoming better. Denies any other new neurological deficits. |
| <b>Visit 6</b>                                |                                                                                                                          |                                                                      |                                                                                                                     |
| Date of Visit (months from initial diagnosis) | 5                                                                                                                        | 7                                                                    | 9                                                                                                                   |
| KPS                                           | 80                                                                                                                       | 70                                                                   | 80                                                                                                                  |
| Mini Mental Status Exam Score                 |                                                                                                                          |                                                                      |                                                                                                                     |
| History of seizures since last visit          | No                                                                                                                       | No                                                                   | Yes                                                                                                                 |
| Neurologic Deficit                            | Yes. Left sided weakness.                                                                                                | Yes. Left hemiparesis.                                               | Yes. Right homonymous hemianopia.                                                                                   |



|                                               |                                                                                                                                                                                                             |                                          |                                                                                                                                                                |
|-----------------------------------------------|-------------------------------------------------------------------------------------------------------------------------------------------------------------------------------------------------------------|------------------------------------------|----------------------------------------------------------------------------------------------------------------------------------------------------------------|
| Symptoms Notes                                | Weak left arm, grip poor, swollen. Very dry skin probably related to the Temodar. Decreased appetite, fatigue.                                                                                              | n/a                                      | One month ago ER visit; patient reported to have numbness of the left arm and leg. Probable seizure.                                                           |
| <b>Visit 7</b>                                |                                                                                                                                                                                                             |                                          |                                                                                                                                                                |
| Date of Visit (months from initial diagnosis) | 6                                                                                                                                                                                                           | 7                                        | 10                                                                                                                                                             |
| KPS                                           | 70                                                                                                                                                                                                          | 70                                       | 70                                                                                                                                                             |
| Mini Mental Status Exam Score                 |                                                                                                                                                                                                             |                                          |                                                                                                                                                                |
| History of seizures since last visit          | No                                                                                                                                                                                                          | No                                       | No                                                                                                                                                             |
| Neurologic Deficit                            | Yes. Right hemiparesis.                                                                                                                                                                                     | Yes. Left hemiparesis.                   | Yes. Right homonymous hemianopia.                                                                                                                              |
| Symptoms Notes                                | Her functional status has remained the same. She has weakness of the left arm but this is possibly attributable, in part, to a frozen shoulder. Decreased appetite, fatigue. Otherwise, she feels the same. |                                          | Keppra is giving patient some difficulty with fatigue and loss of appetite.                                                                                    |
| <b>Visit 8</b>                                |                                                                                                                                                                                                             |                                          |                                                                                                                                                                |
| Date of Visit (months from initial diagnosis) | 6                                                                                                                                                                                                           | 8                                        | 11                                                                                                                                                             |
| KPS                                           | 80                                                                                                                                                                                                          | 70                                       | 70                                                                                                                                                             |
| Mini Mental Status Exam Score                 |                                                                                                                                                                                                             |                                          |                                                                                                                                                                |
| History of seizures since last visit          | No                                                                                                                                                                                                          | No                                       | Yes                                                                                                                                                            |
| Neurologic Deficit                            | Yes. Left hemiparesis.                                                                                                                                                                                      | Yes. Left hemiparesis.                   | Yes. Right homonymous hemianopia.                                                                                                                              |
| Symptoms Notes                                | Weakness on upper extremities.                                                                                                                                                                              | Tolerating therapy without difficulties. | Difficulty with concentration. Probable previous seizure, which was demonstrated by some difficulty the right eye as well as also memory and speech. Resolved. |
| <b>Visit 9</b>                                |                                                                                                                                                                                                             |                                          |                                                                                                                                                                |

|                                               |                                                          |                                                                                                                                                                             |                                                                                                                                                           |
|-----------------------------------------------|----------------------------------------------------------|-----------------------------------------------------------------------------------------------------------------------------------------------------------------------------|-----------------------------------------------------------------------------------------------------------------------------------------------------------|
| Date of Visit (months from initial diagnosis) | 8                                                        | 12                                                                                                                                                                          | 11                                                                                                                                                        |
| KPS                                           | 80                                                       | 70                                                                                                                                                                          | 70                                                                                                                                                        |
| Mini Mental Status Exam Score                 |                                                          |                                                                                                                                                                             |                                                                                                                                                           |
| History of seizures since last visit          | No                                                       | No                                                                                                                                                                          | No                                                                                                                                                        |
| Neurologic Deficit                            | Yes. Left hemiparesis.                                   | Yes. Left hemiparesis.                                                                                                                                                      | Yes. Right homonymous hemianopia.                                                                                                                         |
| Symptoms Notes                                | Left sided weakness; not fully functional; incontinence. | Diminution in taste, decreased appetite, and has had corresponding weight loss.                                                                                             | Some difficulty with thinking; relatively stable.                                                                                                         |
| <b>Visit 10</b>                               |                                                          |                                                                                                                                                                             |                                                                                                                                                           |
| Date of Visit (months from initial diagnosis) | 10                                                       | 15                                                                                                                                                                          | 12                                                                                                                                                        |
| KPS                                           | 70                                                       | 70                                                                                                                                                                          | 70                                                                                                                                                        |
| Mini Mental Status Exam Score                 |                                                          |                                                                                                                                                                             |                                                                                                                                                           |
| History of seizures since last visit          | No                                                       | No.                                                                                                                                                                         | Yes                                                                                                                                                       |
| Neurologic Deficit                            | Yes. Left hemiparesis.                                   | Yes. Left hemiparesis.                                                                                                                                                      | Yes. Right homonymous hemianopia.                                                                                                                         |
| Symptoms Notes                                | Decreased appetite, fatigue.                             | n/a                                                                                                                                                                         | Moderate seizure yesterday.                                                                                                                               |
| <b>Visit 11</b>                               |                                                          |                                                                                                                                                                             |                                                                                                                                                           |
| Date of Visit (months from initial diagnosis) | 11                                                       | 15                                                                                                                                                                          | 13                                                                                                                                                        |
| KPS                                           | 80                                                       | 70                                                                                                                                                                          | 60                                                                                                                                                        |
| Mini Mental Status Exam Score                 |                                                          |                                                                                                                                                                             |                                                                                                                                                           |
| History of seizures since last visit          | No                                                       | No                                                                                                                                                                          | Yes                                                                                                                                                       |
| Neurologic Deficit                            | Yes. Left hemiparesis.                                   | Yes. Left hemiparesis.                                                                                                                                                      | Yes. Right homonymous hemianopia.                                                                                                                         |
| Symptoms Notes                                | n/a                                                      | Recurrent episodes of diarrhea. Continues to have decreased appetite. Weight has dropped to a greater than 20% reduction of baseline weight at the initiation of the study. | Recent seizure problem 3 days ago. Patient is still having difficulty with vision and comprehension. Hand-eye coordination is somewhat worse than before. |
| <b>Visit 12</b>                               |                                                          |                                                                                                                                                                             |                                                                                                                                                           |
| Date of Visit (months from initial diagnosis) | 11                                                       | 16                                                                                                                                                                          | 14                                                                                                                                                        |

|                                               |                                                                |                                                                                                                                                                                  |                                                                                                                                                                                                                                                                |
|-----------------------------------------------|----------------------------------------------------------------|----------------------------------------------------------------------------------------------------------------------------------------------------------------------------------|----------------------------------------------------------------------------------------------------------------------------------------------------------------------------------------------------------------------------------------------------------------|
| KPS                                           | 70                                                             | 70                                                                                                                                                                               | 60                                                                                                                                                                                                                                                             |
| Mini Mental Status Exam Score                 |                                                                |                                                                                                                                                                                  |                                                                                                                                                                                                                                                                |
| History of seizures since last visit          | No                                                             | No                                                                                                                                                                               | Yes                                                                                                                                                                                                                                                            |
| Neurologic Deficit                            | Yes. Left hemiparesis.                                         | Yes. Left hemiparesis.                                                                                                                                                           | Yes. Right homonymous hemianopia.                                                                                                                                                                                                                              |
| Symptoms Notes                                | Balance is weak; beginning to fall more frequently.            | Weight stabilized.                                                                                                                                                               | Another small seizure of the right extremity; they are generally accompanied by difficulty with speech.                                                                                                                                                        |
| <b>Visit 13</b>                               |                                                                |                                                                                                                                                                                  |                                                                                                                                                                                                                                                                |
| Date of Visit (months from initial diagnosis) | 12                                                             | 17                                                                                                                                                                               | 16                                                                                                                                                                                                                                                             |
| KPS                                           | 60                                                             | 70                                                                                                                                                                               | 50                                                                                                                                                                                                                                                             |
| Mini Mental Status Exam Score                 |                                                                |                                                                                                                                                                                  |                                                                                                                                                                                                                                                                |
| History of seizures since last visit          | No                                                             | No                                                                                                                                                                               | Yes                                                                                                                                                                                                                                                            |
| Neurologic Deficit                            | Yes. Left hemiparesis.                                         | Yes. Left hemiparesis.                                                                                                                                                           | Yes. Right homonymous hemianopia.                                                                                                                                                                                                                              |
| Symptoms Notes                                | Occasional headaches in the supraorbital region. Falling more. | Denies any problems with rash, diarrhea is easily managed, her energy level is adequate and her appetite is improved. She does admit to challenges, however, maintaining weight. | Recurrent albeit minor seizures. One month ago patient had either a seizure or a fall with pain. Then 3 days later patient was admitted with mental status changes, probable dehydration. Patient may have had petit mal seizure yesterday. Weight loss, mild. |
| <b>Visit 14</b>                               |                                                                |                                                                                                                                                                                  |                                                                                                                                                                                                                                                                |
| Date of Visit (months from initial diagnosis) | 12                                                             | 18                                                                                                                                                                               | 16                                                                                                                                                                                                                                                             |
| KPS                                           | 60                                                             | 70                                                                                                                                                                               | 60                                                                                                                                                                                                                                                             |
| Mini Mental Status Exam Score                 |                                                                |                                                                                                                                                                                  |                                                                                                                                                                                                                                                                |
| History of seizures since last visit          | No                                                             | No                                                                                                                                                                               | No                                                                                                                                                                                                                                                             |
| Neurologic Deficit                            | Yes. Left hemiparesis.                                         | Yes. Left hemiparesis.                                                                                                                                                           | Yes. Right homonymous hemianopia.                                                                                                                                                                                                                              |

|                                               |                                                                                                                                                                              |                                                                                                                                                                                                                                                           |                                                                              |
|-----------------------------------------------|------------------------------------------------------------------------------------------------------------------------------------------------------------------------------|-----------------------------------------------------------------------------------------------------------------------------------------------------------------------------------------------------------------------------------------------------------|------------------------------------------------------------------------------|
| Symptoms Notes                                | Remains weak.                                                                                                                                                                | She had two days of diarrhea last week. She admits to having a decreased appetite with weight loss, but in general, she has a good appetite. Her energy level is adequate and she has been able to maintain weight until this recent episode of diarrhea. | Difficulty with concentration. No more seizures or hospitalizations for UTI. |
| <b>Visit 15</b>                               |                                                                                                                                                                              |                                                                                                                                                                                                                                                           |                                                                              |
| Date of Visit (months from initial diagnosis) | 13                                                                                                                                                                           | 21                                                                                                                                                                                                                                                        | 17                                                                           |
| KPS                                           | 50                                                                                                                                                                           | 70                                                                                                                                                                                                                                                        | 60                                                                           |
| Mini Mental Status Exam Score                 |                                                                                                                                                                              |                                                                                                                                                                                                                                                           |                                                                              |
| History of seizures since last visit          | Yes                                                                                                                                                                          | No                                                                                                                                                                                                                                                        | No                                                                           |
| Neurologic Deficit                            | Yes. Left hemiparesis.                                                                                                                                                       | Yes. Left hemiparesis.                                                                                                                                                                                                                                    | Yes. Right homonymous hemianopia.                                            |
| Symptoms Notes                                | Decrease in balance ability to control the left leg. can no longer stand for longer than 15 minutes. drags left foot when walking. MRI reflected a probable previous stroke. | n/a                                                                                                                                                                                                                                                       | No changes.                                                                  |
| <b>Visit 16</b>                               |                                                                                                                                                                              |                                                                                                                                                                                                                                                           |                                                                              |
| Date of Visit (months from initial diagnosis) | 14                                                                                                                                                                           | 24                                                                                                                                                                                                                                                        | 18                                                                           |
| KPS                                           | 50                                                                                                                                                                           | 70                                                                                                                                                                                                                                                        | 50                                                                           |
| Mini Mental Status Exam Score                 |                                                                                                                                                                              |                                                                                                                                                                                                                                                           |                                                                              |
| History of seizures since last visit          | No                                                                                                                                                                           | Yes                                                                                                                                                                                                                                                       | No                                                                           |
| Neurologic Deficit                            | Yes. Left hemiparesis.                                                                                                                                                       | Yes. Left hemiparesis.                                                                                                                                                                                                                                    | Yes. Right homonymous hemianopia.                                            |
| Symptoms Notes                                | Worsening ataxia; physical state remains the same.                                                                                                                           | Had partial seizure with postictal confusion a couple days ago, uneventful recovery.                                                                                                                                                                      | No new neurological complaints.                                              |

|                                               |                                                                                                        |                                                                                                                           |  |
|-----------------------------------------------|--------------------------------------------------------------------------------------------------------|---------------------------------------------------------------------------------------------------------------------------|--|
| <b>Visit 17</b>                               |                                                                                                        |                                                                                                                           |  |
| Date of Visit (months from initial diagnosis) | 15                                                                                                     | 27                                                                                                                        |  |
| KPS                                           | 50                                                                                                     | 60                                                                                                                        |  |
| Mini Mental Status Exam Score                 |                                                                                                        |                                                                                                                           |  |
| History of seizures since last visit          | Yes                                                                                                    | Yes                                                                                                                       |  |
| Neurologic Deficit                            | Yes. Left hemiplegia.                                                                                  | Yes. Left hemiparesis.                                                                                                    |  |
| Symptoms Notes                                | Had stroke on Avastin. Patient was also noted to have some hydrocephalus. Decreased appetite, fatigue. | Had another partial seizure about a month ago with postictal confusion, but reluctant to take anti convulsant medication. |  |
| <b>Visit 18</b>                               |                                                                                                        |                                                                                                                           |  |
| Date of Visit (months from initial diagnosis) | 15                                                                                                     | 30                                                                                                                        |  |
| KPS                                           | 50                                                                                                     | 60                                                                                                                        |  |
| Mini Mental Status Exam Score                 |                                                                                                        |                                                                                                                           |  |
| History of seizures since last visit          | Yes                                                                                                    | No                                                                                                                        |  |
| Neurologic Deficit                            | Yes. Left hemiparesis.                                                                                 | Yes. Left hemiparesis.                                                                                                    |  |
| Symptoms Notes                                | Right leg somewhat compromised. Overall, patient feels about the same.                                 | Weight loss, discontinue XL 184 for a week.                                                                               |  |
| <b>Visit 19</b>                               |                                                                                                        |                                                                                                                           |  |
| Date of Visit (months from initial diagnosis) |                                                                                                        | 33                                                                                                                        |  |
| KPS                                           |                                                                                                        | 50                                                                                                                        |  |
| Mini Mental Status Exam Score                 |                                                                                                        |                                                                                                                           |  |
| History of seizures since last visit          |                                                                                                        | No                                                                                                                        |  |
| Neurologic Deficit                            |                                                                                                        | Yes. Left hemiparesis.                                                                                                    |  |
| Symptoms Notes                                |                                                                                                        | Failed first investigational therapy and now treated on second relapse with single agent Avastin.                         |  |

| Clinical Trials |    |                                                                |    |
|-----------------|----|----------------------------------------------------------------|----|
| 1               | // | Exelixis, Relapsed Astrocytic Tumors with XL184 Regimen, 10041 | // |
| 2               |    | NovoCure                                                       |    |

| Patient ID                           | W7-1-1                                                                                       | W8-1-1                                                      | W9-1-1                                 |
|--------------------------------------|----------------------------------------------------------------------------------------------|-------------------------------------------------------------|----------------------------------------|
| <b>Patient Information</b>           |                                                                                              |                                                             |                                        |
| Gender                               | Male                                                                                         | Female                                                      | Male                                   |
| Age at Initial Diagnosis             | 61                                                                                           | 50                                                          | 51                                     |
| Weight                               | 79.833 kg                                                                                    | 53.1 kg                                                     | 100.245 kg                             |
| Height                               | 182.61 cm                                                                                    | 165.0 cm                                                    | 173.72 cm                              |
| KPS                                  | 100 (?)                                                                                      | 70 (?)                                                      | 90 (?)                                 |
| Mini Mental Status Exam Score        | 26                                                                                           | 9                                                           | 23                                     |
| History of Seizures Since Last Visit | No                                                                                           | No                                                          | No                                     |
| Neurologic Deficit                   | No                                                                                           | Yes. Right. Visual field cut, aphasia.                      | No                                     |
| Presentation Symptoms                | Progressive right-sided/pancranial headaches, nausea, emesis, sense of imbalance, dizziness. | Progressive speech disturbance, clumsiness with right hand. | Headaches, memory and balance problems |
| Time to Progression                  | 366 days                                                                                     | 29 days                                                     | 109 days                               |
| Overall Survival                     | 437 days                                                                                     | 442 days                                                    | 145 days                               |
| Time to Last Follow-up               | NA                                                                                           | NA                                                          | NA                                     |
| Cause Of Death                       | Tumor progression                                                                            | Tumor progression                                           | Tumor progression                      |
| <b>Tumor Information</b>             |                                                                                              |                                                             |                                        |
| <b>Tumor 1</b>                       |                                                                                              |                                                             |                                        |
| Date (months from initial diagnosis) | 0                                                                                            | 0                                                           | 0                                      |
| Diagnosis                            | Astrocytic tumor                                                                             | Astrocytic tumor                                            | Astrocytic tumor                       |
| Grade                                | Glioblastoma WHO Grade IV                                                                    | Glioblastoma WHO Grade IV                                   | Giant Cell Glioblastoma WHO grade IV   |
| Location                             | Right Temporal                                                                               | Left Parietal                                               | Right Frontal                          |
| <b>Tumor 2</b>                       |                                                                                              |                                                             |                                        |

|                                       |                      |                           |                                              |
|---------------------------------------|----------------------|---------------------------|----------------------------------------------|
| Date (months from initial diagnosis)  |                      | 0                         | 0                                            |
| Diagnosis                             |                      | Astrocytic tumor          | Astrocytic tumor                             |
| Grade                                 |                      | Glioblastoma WHO grade IV | Glioblastoma WHO grade IV                    |
| Location                              |                      | Left Temporal             | Left occipital, left parietal, left temporal |
| <b>Medications</b>                    |                      |                           |                                              |
| <b>Medication 1</b>                   |                      |                           |                                              |
| Category                              | Anti-epileptic       | Anti-epileptic            | Steroids                                     |
| Drug Name                             | Levetiracetam        | Phenytoin                 | Dexamethasone                                |
| Start (months from initial diagnosis) | -1                   | -1                        | -1                                           |
| Total Daily Dosage                    | 1000-2000mg          | 100-400mg                 | 4-16mg                                       |
| End (months from initial diagnosis)   | 12                   | 14                        | 4                                            |
| <b>Medication 2</b>                   |                      |                           |                                              |
| Category                              | Steroids             | Steroids                  | Anti-epileptic                               |
| Drug Name                             | Dexamethasone        | Dexamethasone             | Fosphenytoin                                 |
| Start (months from initial diagnosis) | -1                   | -1                        | 0                                            |
| Total Daily Dosage                    | 8-24mg               | 4-40mg                    | 300mg                                        |
| End (months from initial diagnosis)   | 12                   | 14                        | 0                                            |
| <b>Medication 3</b>                   |                      |                           |                                              |
| Category                              | Cholesterol lowering |                           | Anti-epileptic                               |
| Drug Name                             | Simvastatin          |                           | Phenytoin                                    |
| Start (months from initial diagnosis) | -1                   |                           | 0                                            |
| Total Daily Dosage                    | 20mg                 |                           | 300mg                                        |
| End (months from initial diagnosis)   | 0                    |                           | 0                                            |
| <b>Medication 4</b>                   |                      |                           |                                              |
| Category                              | Antihypertensive     |                           | Anti-epileptic                               |
| Drug Name                             | Olmesartan           |                           | Levetiracetam                                |
| Start (months from initial diagnosis) | 0                    |                           | 0                                            |
| Total Daily Dosage                    | 12.5mg               |                           | 1000mg                                       |
| End (months from initial diagnosis)   | 12                   |                           | 4                                            |
| <b>Medication 5</b>                   |                      |                           |                                              |
| Category                              | Antihypertensive     |                           | Steroids                                     |
| Drug Name                             | Lisinopril           |                           | Prednisone                                   |
| Start (months from initial diagnosis) | 12                   |                           | 3                                            |
| Total Daily Dosage                    | 20mg                 |                           | 50mg                                         |

|                                                 |                           |                           |                                    |
|-------------------------------------------------|---------------------------|---------------------------|------------------------------------|
| End (months from initial diagnosis)             | 12                        |                           | 3                                  |
| <b>Surgery</b>                                  |                           |                           |                                    |
| <b>Surgery 1</b>                                |                           |                           |                                    |
| Date of Surgery (months from initial diagnosis) | 0                         | 0                         | 0                                  |
| Gliadel                                         | No                        | No                        | No                                 |
| Awake mapping                                   | No                        | Yes                       | No                                 |
| Stealth scan                                    | Yes                       | Yes                       | Yes                                |
| <b>Tissue Diagnosis</b>                         |                           |                           |                                    |
| <b>Tissue 1</b>                                 |                           |                           |                                    |
| Serial Number                                   | W7-1-1, SN163             | W8-1-1, SN175             | W9-1-1, SN179-1                    |
| Diagnosis                                       | Glioblastoma WHO grade IV | Glioblastoma WHO grade IV | Glioblastoma WHO grade IV          |
| Location                                        | Right Temporal            | Left Parietal             | Right Frontal                      |
| Extent                                          | Subtotal resection 90%    | Complete resection        | Complete resection                 |
| MRI confirmation                                | Yes                       | Yes                       | Yes                                |
| Notes                                           |                           | Temporal not resected     | Left hemisphere tumor not resected |
| <b>Tissue 2</b>                                 |                           |                           |                                    |
| Serial Number                                   |                           |                           | SN179-2                            |
| Diagnosis                                       |                           |                           | Normal                             |
| Location                                        |                           |                           | Right Frontal                      |
| Extent                                          |                           |                           | Complete resection                 |
| MRI confirmation                                |                           |                           | Yes                                |
| <b>Chemotherapy</b>                             |                           |                           |                                    |
| <b>Medication 1</b>                             |                           |                           |                                    |
| Drug Name                                       | Temozolomide              | Temozolomide              | Temozolomide                       |
| Start (months from initial diagnosis)           | 0                         | 0                         | 1                                  |
| Dosage                                          | 155mg QD                  | 120mg                     | 140mg TD                           |
| End (months from initial diagnosis)             | 2                         | 2                         | 2                                  |
| Description                                     | 21 day cycles             | Concurrent                | Concurrent                         |
| <b>Medication 2</b>                             |                           |                           |                                    |
| Drug Name                                       | Avastin                   | Avastin                   |                                    |



|                                       |                        |                         |  |
|---------------------------------------|------------------------|-------------------------|--|
| Start (months from initial diagnosis) | 12                     | 0                       |  |
| Dosage                                | 10mg/kg                | 520mg                   |  |
| End (months from initial diagnosis)   |                        | 13                      |  |
| Description                           | Q14D                   | twice monthly           |  |
| <b>Medication 3</b>                   |                        |                         |  |
| Drug Name                             | Irinotecan             | Temozolomide            |  |
| Start (months from initial diagnosis) | 12                     | 2                       |  |
| Dosage                                | 125mg/m2               | 225mg                   |  |
| End (months from initial diagnosis)   | 13                     | 2                       |  |
| Description                           | 4 out of 6 week cycles | daily oral              |  |
| <b>Medication 4</b>                   |                        |                         |  |
| Drug Name                             |                        | Temozolomide            |  |
| Start (months from initial diagnosis) |                        | 3                       |  |
| Dosage                                |                        | 300mg                   |  |
| End (months from initial diagnosis)   |                        | 7                       |  |
| Description                           |                        | 2-3 weeks oral          |  |
| <b>Medication 5</b>                   |                        |                         |  |
| Drug Name                             |                        | Etoposide               |  |
| Start (months from initial diagnosis) |                        | 7                       |  |
| Dosage                                |                        | 50mg BID                |  |
| End (months from initial diagnosis)   |                        | 11                      |  |
| Description                           |                        | 21 day cycles           |  |
| <b>Medication 6</b>                   |                        |                         |  |
| Drug Name                             |                        | Lomustine               |  |
| Start (months from initial diagnosis) |                        | 10                      |  |
| Dosage                                |                        | 180mg                   |  |
| End (months from initial diagnosis)   |                        | 10                      |  |
| Description                           |                        | One time administration |  |
| <b>Medication 7</b>                   |                        |                         |  |
| Drug Name                             |                        | Lomustine               |  |
| Start (months from initial diagnosis) |                        | 11                      |  |

|                                                   |                           |                            |                         |
|---------------------------------------------------|---------------------------|----------------------------|-------------------------|
| Dosage                                            |                           |                            |                         |
| End (months from initial diagnosis)               |                           | 12                         |                         |
| Description                                       |                           | daily oral                 |                         |
| <b>Medication 8</b>                               |                           |                            |                         |
| Drug Name                                         |                           | Carboplatin                |                         |
| Start (months from initial diagnosis)             |                           | 12                         |                         |
| Dosage                                            |                           | 465mg                      |                         |
| End (months from initial diagnosis)               |                           | 12                         |                         |
| Description                                       |                           | One time administration    |                         |
| <b>Radiation Therapy</b>                          |                           |                            |                         |
| <b>Medication 1</b>                               |                           |                            |                         |
| Type                                              | IMRT                      | IMRT                       | WBRT                    |
| Start (months from initial diagnosis)             | 0                         | 0                          | 1                       |
| Dosage                                            | 5940 cGy                  | 4500 cGy                   | 4500 cGy                |
| End (months from initial diagnosis)               | 2                         | 1                          | 2                       |
| Description                                       |                           | Concurrent                 |                         |
| Fraction                                          | 33                        | 25                         | 25                      |
| <b>Medication 2</b>                               |                           |                            |                         |
| Type                                              | Stereotactic              | IMRT                       | WBRT                    |
| Start (months from initial diagnosis)             | 12                        | 1                          | 2                       |
| Dosage                                            | 38 Gy                     | 1440 cGy                   | 1400 cGy                |
| End (months from initial diagnosis)               | 12                        | 2                          | 2                       |
| Description                                       | Gamma Knife               | Cone Down Boost            | Boost                   |
| Fraction                                          |                           | 8                          | 8                       |
| <b>Pathology</b>                                  |                           |                            |                         |
| <b>Surgery 1</b>                                  |                           |                            |                         |
| Date Of Report<br>(months from initial diagnosis) | 0                         | 0                          | 0                       |
| <b>Report</b>                                     |                           |                            |                         |
| Location                                          | Tissue: W7-1-1, SN163     | Tissue: W8-1-1, SN175      | Tissue: W9-1-1, SN179-1 |
| Histopathology                                    | Glioblastoma WHO grade IV | Glioblastoma, WHO grade IV | Glioblastoma            |
| 1p19q_deletion                                    | Normal                    | Normal                     | Normal                  |
| EGFR                                              | gain                      | gain                       | gain                    |

|                                                |                         |                           |                           |
|------------------------------------------------|-------------------------|---------------------------|---------------------------|
| PTEN                                           | loss                    | loss                      | loss                      |
| MGMT PCR                                       | methyated               | unmethyated               | unmethyated               |
| MGMT IHC                                       | negative                | 30% View Slides: A        | 30%                       |
| MGMT MS-MLPA:R1                                | methyated (0.473459822) | methyated (1.024080679)   | unmethyated (0.210228374) |
| MGMT MS-MLPA:R2                                | methyated (0.38712508)  | unmethyated (0.047513901) | unmethyated (0.063881572) |
| MGMT MS-MLPA:R3                                | methyated (0.395032755) | unmethyated (0.048225987) | unmethyated (0)           |
| IDH1 mutation                                  | wildtype                | wildtype                  | wildtype                  |
| EGFR vIII                                      | not detected            | not detected              | not detected              |
| <b>Surgery 2</b>                               |                         |                           |                           |
| Date Of Report (months from initial diagnosis) |                         |                           |                           |
| <b>Report</b>                                  |                         |                           | (Still surgery 1)         |
| Location                                       |                         |                           | Tissue: SN179-2           |
| Histopathology                                 |                         |                           |                           |
| 1p19q_deletion                                 |                         |                           |                           |
| EGFR                                           |                         |                           |                           |
| PTEN                                           |                         |                           |                           |
| MGMT PCR                                       |                         |                           |                           |
| MGMT IHC                                       |                         |                           |                           |
| MGMT MS-MLPA:R1                                |                         |                           | unmethyated ()            |
| MGMT MS-MLPA:R2                                |                         |                           | unmethyated ()            |
| MGMT MS-MLPA:R3                                |                         |                           | unmethyated ()            |
| IDH1 mutation                                  |                         |                           |                           |
| EGFR vIII                                      |                         |                           |                           |
| <b>Follow-up Clinic Visit</b>                  |                         |                           |                           |
| <b>Visit 1</b>                                 |                         |                           |                           |
| Date of Visit (months from initial diagnosis)  | 0                       | -1                        | 0                         |
| KPS                                            | 100                     | 70                        | 90                        |
| Mini Mental Status Exam Score                  |                         | 9                         | 23                        |
| History of seizures since last visit           | No                      | No                        | No                        |
| Neurologic Deficit                             | No                      | Yes. Right                | No                        |

|                                               |                                                                                                  |                                                                                                                                                  |                                                                                                                |
|-----------------------------------------------|--------------------------------------------------------------------------------------------------|--------------------------------------------------------------------------------------------------------------------------------------------------|----------------------------------------------------------------------------------------------------------------|
| Symptoms Notes                                | In the intervening time, he has done exceedingly well and notes no symptoms at the present time. | Progressive speech disturbance, clumsiness with right hand.                                                                                      | He has been doing well. No longer evidence of left hemiparesis.                                                |
| <b>Visit 2</b>                                |                                                                                                  |                                                                                                                                                  |                                                                                                                |
| Date of Visit (months from initial diagnosis) | 3                                                                                                | 0                                                                                                                                                | 0                                                                                                              |
| KPS                                           | 100                                                                                              |                                                                                                                                                  | 90                                                                                                             |
| Mini Mental Status Exam Score                 |                                                                                                  | 9                                                                                                                                                |                                                                                                                |
| History of seizures since last visit          | No                                                                                               | No                                                                                                                                               | No                                                                                                             |
| Neurologic Deficit                            | No                                                                                               | No                                                                                                                                               | No                                                                                                             |
| Symptoms Notes                                | Occasional headaches. Speech has been good. No memory changes. Overall, doing great.             | Hesitant spontaneous speech, mild difficulty following one-step motor commands, and moderate difficulty with more complex commands, mild anomia. | Appetite is good, he has gained weight. Denies any neurological symptoms, able to walk without balance issues. |
| <b>Visit 3</b>                                |                                                                                                  |                                                                                                                                                  |                                                                                                                |
| Date of Visit (months from initial diagnosis) | 11                                                                                               | 0                                                                                                                                                | 2                                                                                                              |
| KPS                                           | 90                                                                                               |                                                                                                                                                  | 80                                                                                                             |
| Mini Mental Status Exam Score                 |                                                                                                  | 10                                                                                                                                               |                                                                                                                |
| History of seizures since last visit          | No                                                                                               | No                                                                                                                                               | No                                                                                                             |
| Neurologic Deficit                            | No                                                                                               | No. Aphasia.                                                                                                                                     | No                                                                                                             |
| Symptoms Notes                                | The only new complaints of the vision changes, with diplopia and dizziness.                      | Some increase in headache, language difficulty, and right-sided weakness. Some clinical deterioration.                                           | Occasional headache when waking up in morning. Appetite has been excellent. Denies any neurological changes.   |
| <b>Visit 4</b>                                |                                                                                                  |                                                                                                                                                  |                                                                                                                |
| Date of Visit (months from initial diagnosis) | 12                                                                                               | 0                                                                                                                                                | 2                                                                                                              |
| KPS                                           |                                                                                                  |                                                                                                                                                  | 80                                                                                                             |
| Mini Mental Status Exam Score                 | 26                                                                                               | 9                                                                                                                                                |                                                                                                                |
| History of seizures since last visit          | No                                                                                               | No                                                                                                                                               | No                                                                                                             |

|                                               |                                                                                                                                                                                                                                                                                  |                                                                                                                            |                                                                                                                                                          |
|-----------------------------------------------|----------------------------------------------------------------------------------------------------------------------------------------------------------------------------------------------------------------------------------------------------------------------------------|----------------------------------------------------------------------------------------------------------------------------|----------------------------------------------------------------------------------------------------------------------------------------------------------|
| Neurologic Deficit                            | No                                                                                                                                                                                                                                                                               | Yes. Right-sided weakness, aphasia.                                                                                        | No                                                                                                                                                       |
| Symptoms Notes                                | Approximately one month ago, he began to complain of dizziness and some diplopia and mild mental confusion. A few days after that he underwent gamma knife treatment for six lesions.                                                                                            | Right-sided weakness affecting predominantly the face and right arm over the last two weeks. Deteriorating motor function. | Woke up with headache in the morning that persisted throughout day. No fever or chills, reports no new neurological symptoms. Did report feeling sleepy. |
| <b>Visit 5</b>                                |                                                                                                                                                                                                                                                                                  |                                                                                                                            |                                                                                                                                                          |
| Date of Visit (months from initial diagnosis) | 13                                                                                                                                                                                                                                                                               | 2                                                                                                                          | 3                                                                                                                                                        |
| KPS                                           | 70                                                                                                                                                                                                                                                                               |                                                                                                                            | 70                                                                                                                                                       |
| Mini Mental Status Exam Score                 |                                                                                                                                                                                                                                                                                  | 14                                                                                                                         |                                                                                                                                                          |
| History of seizures since last visit          | Yes                                                                                                                                                                                                                                                                              | No                                                                                                                         | No                                                                                                                                                       |
| Neurologic Deficit                            | No                                                                                                                                                                                                                                                                               | Yes. Right-sided weakness, aphasia.                                                                                        | No                                                                                                                                                       |
| Symptoms Notes                                | He has been unsteady of foot. There has been no worsening confusion. Appetite improved today. There is no nausea, vomiting, or worsening headache. He is globally weak, but has no focal neurological deficit. Patient is fatigued. The patient is neurologically deteriorating. | Improvement in clinical symptoms.                                                                                          | Significant problems with memory. Failed an attempted dexamethasone taper. Trouble with fatigue, but otherwise tolerated the treatment well.             |
| <b>Visit 6</b>                                |                                                                                                                                                                                                                                                                                  |                                                                                                                            |                                                                                                                                                          |
| Date of Visit (months from initial diagnosis) |                                                                                                                                                                                                                                                                                  | 4                                                                                                                          | 3                                                                                                                                                        |
| KPS                                           |                                                                                                                                                                                                                                                                                  |                                                                                                                            | 70                                                                                                                                                       |
| Mini Mental Status Exam Score                 |                                                                                                                                                                                                                                                                                  | 12                                                                                                                         |                                                                                                                                                          |
| History of seizures since last visit          |                                                                                                                                                                                                                                                                                  | No                                                                                                                         | No                                                                                                                                                       |
| Neurologic Deficit                            |                                                                                                                                                                                                                                                                                  | Yes. Right-sided weakness, aphasia.                                                                                        | No                                                                                                                                                       |

|                                               |  |                                                                                                                                        |                                                                                          |
|-----------------------------------------------|--|----------------------------------------------------------------------------------------------------------------------------------------|------------------------------------------------------------------------------------------|
| Symptoms Notes                                |  | Some increase in sensory abnormality in the ulnar aspect of the right hand.                                                            | Began having headaches one week ago at which point he was taking 1 mg of Decadron daily. |
| <b>Visit 7</b>                                |  |                                                                                                                                        |                                                                                          |
| Date of Visit (months from initial diagnosis) |  | 5                                                                                                                                      |                                                                                          |
| KPS                                           |  |                                                                                                                                        |                                                                                          |
| Mini Mental Status Exam Score                 |  | 13                                                                                                                                     |                                                                                          |
| History of seizures since last visit          |  | No                                                                                                                                     |                                                                                          |
| Neurologic Deficit                            |  | Yes. Right-sided weakness, aphasia.                                                                                                    |                                                                                          |
| Symptoms Notes                                |  | Continuing to have deteriorating sensory function of the right hand and also now has begun to note some difficulties in the right leg. |                                                                                          |
| <b>Visit 8</b>                                |  |                                                                                                                                        |                                                                                          |
| Date of Visit (months from initial diagnosis) |  | 6                                                                                                                                      |                                                                                          |
| KPS                                           |  |                                                                                                                                        |                                                                                          |
| Mini Mental Status Exam Score                 |  | 16                                                                                                                                     |                                                                                          |
| History of seizures since last visit          |  | Yes                                                                                                                                    |                                                                                          |
| Neurologic Deficit                            |  | Yes. Right-sided weakness, aphasia.                                                                                                    |                                                                                          |
| Symptoms Notes                                |  | Increased right hand numbness; sensation loss in her right ankle/foot.                                                                 |                                                                                          |
| <b>Visit 9</b>                                |  |                                                                                                                                        |                                                                                          |
| Date of Visit (months from initial diagnosis) |  | 7                                                                                                                                      |                                                                                          |
| KPS                                           |  |                                                                                                                                        |                                                                                          |
| Mini Mental Status Exam Score                 |  | 16                                                                                                                                     |                                                                                          |
| History of seizures since last visit          |  | No                                                                                                                                     |                                                                                          |

|                                               |  |                                                                                                                                                                 |  |
|-----------------------------------------------|--|-----------------------------------------------------------------------------------------------------------------------------------------------------------------|--|
| Neurologic Deficit                            |  | Yes. Right-sided weakness, aphasia.                                                                                                                             |  |
| Symptoms Notes                                |  | Sensory disturbance on the right side.                                                                                                                          |  |
| <b>Visit 10</b>                               |  |                                                                                                                                                                 |  |
| Date of Visit (months from initial diagnosis) |  | 8                                                                                                                                                               |  |
| KPS                                           |  |                                                                                                                                                                 |  |
| Mini Mental Status Exam Score                 |  | 21                                                                                                                                                              |  |
| History of seizures since last visit          |  | No                                                                                                                                                              |  |
| Neurologic Deficit                            |  | No. Right-sided weakness, aphasia.                                                                                                                              |  |
| Symptoms Notes                                |  | n/a                                                                                                                                                             |  |
| <b>Visit 11</b>                               |  |                                                                                                                                                                 |  |
| Date of Visit (months from initial diagnosis) |  | 12                                                                                                                                                              |  |
| KPS                                           |  | 60                                                                                                                                                              |  |
| Mini Mental Status Exam Score                 |  |                                                                                                                                                                 |  |
| History of seizures since last visit          |  | No                                                                                                                                                              |  |
| Neurologic Deficit                            |  | Yes. Right-sided weakness, aphasia.                                                                                                                             |  |
| Symptoms Notes                                |  | Further decrease in motor function on the right side. Walking into the hospital today, pt slipped and fell on right shoulder and has acute right shoulder pain. |  |
| <b>Visit 12</b>                               |  |                                                                                                                                                                 |  |
| Date of Visit (months from initial diagnosis) |  | 12                                                                                                                                                              |  |
| KPS                                           |  | 60                                                                                                                                                              |  |
| Mini Mental Status Exam Score                 |  |                                                                                                                                                                 |  |
| History of seizures since last visit          |  | No                                                                                                                                                              |  |
| Neurologic Deficit                            |  | No. Right-sided weakness, aphasia.                                                                                                                              |  |

|                                               |    |                                                                                                                                                                                                       |    |
|-----------------------------------------------|----|-------------------------------------------------------------------------------------------------------------------------------------------------------------------------------------------------------|----|
| Symptoms Notes                                |    | n/a                                                                                                                                                                                                   |    |
| <b>Visit 13</b>                               |    |                                                                                                                                                                                                       |    |
| Date of Visit (months from initial diagnosis) |    | 13                                                                                                                                                                                                    |    |
| KPS                                           |    | 50                                                                                                                                                                                                    |    |
| Mini Mental Status Exam Score                 |    |                                                                                                                                                                                                       |    |
| History of seizures since last visit          |    | No                                                                                                                                                                                                    |    |
| Neurologic Deficit                            |    | Yes. Right-sided weakness, aphasia.                                                                                                                                                                   |    |
| Symptoms Notes                                |    | Gradual decline in neurologic function. This has become more marked over the last two to three days; no longer able to comprehend conversations to any degree, and right arm has become functionless. |    |
| <b>Clinical Trials</b>                        |    |                                                                                                                                                                                                       |    |
| 1                                             | // | //                                                                                                                                                                                                    | // |

| <b>Patient ID</b>                    | <b>W10-1-1</b> | <b>W11-1-1</b> | <b>W12-1-1</b>                   |
|--------------------------------------|----------------|----------------|----------------------------------|
| <b>Patient Information</b>           |                |                |                                  |
| Gender                               | Female         | Male           | Female                           |
| Age at Initial Diagnosis             | 45             | 58             | 61                               |
| Weight                               | 100.4 kg       | 82.3 kg        | 64.0 kg                          |
| Height                               | 177.8 cm       | 177.8 cm       | 160.0 cm                         |
| KPS                                  | 100 (?)        | 100 (?)        | 70 (?)                           |
| Mini Mental Status Exam Score        |                |                |                                  |
| History of Seizures Since Last Visit | No             | Yes            | No                               |
| Neurologic Deficit                   | No             | No             | Yes. Left. Weakness arm and leg. |



|                                       |                                              |                                   |                                              |
|---------------------------------------|----------------------------------------------|-----------------------------------|----------------------------------------------|
| Presentation Symptoms                 | Progressive headache, nausea, blurry vision. | Dizziness, imbalance, and nausea. | Worsening headaches, clumsiness of left leg. |
| Time to Progression                   | NA                                           | 159 days                          | NA                                           |
| Overall Survival                      | NA                                           | 1076 days                         | 80 days                                      |
| Time to Last Follow-up                | 1623 days                                    | NA                                | NA                                           |
| Cause Of Death                        | //                                           | Tumor progression                 | Tumor progression                            |
| <b>Tumor Information</b>              |                                              |                                   |                                              |
| <b>Tumor 1</b>                        |                                              |                                   |                                              |
| Date (months from initial diagnosis)  | 0                                            | 0                                 | 0                                            |
| Diagnosis                             | Astrocytic tumor                             | Astrocytic tumor                  | Astrocytic tumor                             |
| Grade                                 | Glioblastoma WHO grade IV                    | Glioblastoma WHO grade IV         | Glioblastoma WHO grade IV                    |
| Location                              | Left Parietal                                | Right Parietal                    | Right Frontal. Right Temporal.               |
| <b>Medications</b>                    |                                              |                                   |                                              |
| <b>Medication 1</b>                   |                                              |                                   |                                              |
| Category                              | Anti-epileptic                               | Steroids                          | Cholesterol Lowering                         |
| Drug Name                             | KEPPRA                                       | Dexamethasone                     | -1                                           |
| Start (months from initial diagnosis) | -4                                           | -2                                | Pravastatin                                  |
| Total Daily Dosage                    | 1000-2000mg                                  | 2-16mg                            | 20mg                                         |
| End (months from initial diagnosis)   | -3                                           | 35                                | 0                                            |
| <b>Medication 2</b>                   |                                              |                                   |                                              |
| Category                              | Multi-vitamin                                | Cholesterol Lowering              | Anti-depressant                              |
| Drug Name                             |                                              | Simvastatin                       | Citalopram                                   |
| Start (months from initial diagnosis) | -4                                           | -1                                | -1                                           |
| Total Daily Dosage                    | 1 cap daily oral                             | 20mg                              | 40-60mg                                      |
| End (months from initial diagnosis)   | -3                                           | 24                                | 0                                            |
| <b>Medication 3</b>                   |                                              |                                   |                                              |
| Category                              | Anti-epileptic                               | Anti-epileptic                    | Antihypertensive                             |
| Drug Name                             | Lamotrigine                                  | Levetiracetam                     | Metoprolol                                   |
| Start (months from initial diagnosis) | -3                                           | -1                                | -1                                           |
| Total Daily Dosage                    | 25-50mg                                      | 100-2000mg                        | 50mg                                         |

|                                       |               |                 |                                                      |
|---------------------------------------|---------------|-----------------|------------------------------------------------------|
| End (months from initial diagnosis)   | 16            | 35              | 0                                                    |
| <b>Medication 4</b>                   |               |                 |                                                      |
| Category                              | Steroids      | Anti-depressant | Steroids                                             |
| Drug Name                             | Dexamethasone | Sertralite      | Dexamethasone                                        |
| Start (months from initial diagnosis) | -1            | 3               | 0                                                    |
| Total Daily Dosage                    | 4-16mg        | 25mg            | 4mg/1ml injection 4mg<br>4x/day                      |
| End (months from initial diagnosis)   | 16            | 17              | 0                                                    |
| <b>Medication 5</b>                   |               |                 |                                                      |
| Category                              |               |                 | Anti-epileptic                                       |
| Drug Name                             |               |                 | KEPPRA                                               |
| Start (months from initial diagnosis) |               |                 | 0                                                    |
| Total Daily Dosage                    |               |                 | 1000mg in NS (0.9% NaCl)<br>IV solution 100mg 2x/day |
| End (months from initial diagnosis)   |               |                 | 0                                                    |
| <b>Medication 6</b>                   |               |                 |                                                      |
| Category                              |               |                 | Anti-epileptic                                       |
| Drug Name                             |               |                 | Valproic Acid                                        |
| Start (months from initial diagnosis) |               |                 | 0                                                    |
| Total Daily Dosage                    |               |                 | 1250mg                                               |
| End (months from initial diagnosis)   |               |                 | 0                                                    |
| <b>Medication 7</b>                   |               |                 |                                                      |
| Category                              |               |                 | Cholesterol Lowering                                 |
| Drug Name                             |               |                 | Simvastatin                                          |
| Start (months from initial diagnosis) |               |                 | 0                                                    |
| Total Daily Dosage                    |               |                 | 10mg                                                 |
| End (months from initial diagnosis)   |               |                 | 0                                                    |
| <b>Medication 8</b>                   |               |                 |                                                      |
| Category                              |               |                 | Steroids                                             |
| Drug Name                             |               |                 | Dexamethasone                                        |
| Start (months from initial diagnosis) |               |                 | 0                                                    |
| Total Daily Dosage                    |               |                 | 2mg 2x/day oral                                      |
| End (months from initial diagnosis)   |               |                 | 1                                                    |
| <b>Surgery</b>                        |               |                 |                                                      |
| <b>Surgery 1</b>                      |               |                 |                                                      |

|                                                 |                           |                           |                           |
|-------------------------------------------------|---------------------------|---------------------------|---------------------------|
| Date of Surgery (months from initial diagnosis) | 0                         | 0                         | 0                         |
| Gliadel                                         | No                        | No                        | No                        |
| Awake mapping                                   | Yes                       | No                        | No                        |
| Stealth scan                                    | Yes                       | Yes                       | Yes                       |
| <b>Tissue Diagnosis</b>                         |                           |                           |                           |
| <b>Tissue 1</b>                                 |                           |                           |                           |
| Serial Number                                   | W10-1-1, SN183            | W11-1-1, SN187            | W12-1-1, SN191            |
| Diagnosis                                       | Glioblastoma WHO grade IV | Glioblastoma WHO grade IV | Glioblastoma WHO grade IV |
| Location                                        | Left Parietal             | Right Parietal            | Right Temporal            |
| Extent                                          | Complete resection        | Complete resection        | Complete resection        |
| MRI confirmation                                | Yes                       | Yes                       | Yes                       |
| Notes                                           |                           | motor mapping             | frontal not resected      |
| <b>Tissue 2</b>                                 |                           |                           | <u>Still Surgery 1</u>    |
| Serial Number                                   |                           |                           | SN191-2                   |
| Diagnosis                                       |                           |                           | Normal                    |
| Location                                        |                           |                           | Right Temporal            |
| Extent                                          |                           |                           | Complete resection        |
| MRI confirmation                                |                           |                           | /                         |
| Notes                                           |                           |                           | /                         |
| <b>Chemotherapy</b>                             |                           |                           |                           |
| <b>Medication 1</b>                             |                           |                           |                           |
| Drug Name                                       | Temozolomide              | Temozolomide              | /                         |
| Start (months from initial diagnosis)           | 1                         | 1                         | /                         |
| Dosage                                          | 140mg                     | 150mg TD                  | /                         |
| End (months from initial diagnosis)             | 3                         | 2                         | /                         |
| Description                                     | Concurrent                | Concurrent                | /                         |
| <b>Medication 2</b>                             |                           |                           |                           |
| Drug Name                                       | Temozolomide              | Temozolomide              |                           |

|                                       |                    |                   |   |
|---------------------------------------|--------------------|-------------------|---|
| Start (months from initial diagnosis) | 3                  | 3                 |   |
| Dosage                                | 300mg              | 150mg TD          |   |
| End (months from initial diagnosis)   | 18                 | 5                 |   |
| Description                           | maintenance 5x/mo. | Maintenance 5x/mo |   |
| <b>Medication 3</b>                   |                    |                   |   |
| Drug Name                             |                    | Avastin           |   |
| Start (months from initial diagnosis) |                    | 7                 |   |
| Dosage                                |                    | 800mg             |   |
| End (months from initial diagnosis)   |                    | 28                |   |
| Description                           |                    | 1x/2wks           |   |
| <b>Medication 4</b>                   |                    |                   |   |
| Drug Name                             |                    | Lomustine         |   |
| Start (months from initial diagnosis) |                    | 17                |   |
| Dosage                                |                    | 200mg QD          |   |
| End (months from initial diagnosis)   |                    | 24                |   |
| Description                           |                    | 1dose/month       |   |
| <b>Medication 5</b>                   |                    |                   |   |
| Drug Name                             |                    | Avastin           |   |
| Start (months from initial diagnosis) |                    | 28                |   |
| Dosage                                |                    | 800mg             |   |
| End (months from initial diagnosis)   |                    |                   |   |
| Description                           |                    | 1x/3wks           |   |
| <b>Radiation Therapy</b>              |                    |                   |   |
| <b>Medication 1</b>                   |                    |                   |   |
| Type                                  | IMRT               | IMRT              | / |
| Start (months from initial diagnosis) | 1                  | 1                 | / |
| Dosage                                | 6300 cGy           | 4600 cGy          | / |
| End (months from initial diagnosis)   | 2                  | 2                 | / |
| Description                           |                    | Parietal Lobe     | / |
| Fraction                              | 35                 | 23                | / |
| <b>Medication 2</b>                   |                    |                   |   |

|                                                   |                            |                            |                                                      |
|---------------------------------------------------|----------------------------|----------------------------|------------------------------------------------------|
| Type                                              |                            | IMRT                       |                                                      |
| Start (months from initial diagnosis)             |                            | 2                          |                                                      |
| Dosage                                            |                            | 1400 cGy                   |                                                      |
| End (months from initial diagnosis)               |                            | 2                          |                                                      |
| Description                                       |                            | Boost                      |                                                      |
| Fraction                                          |                            | 7                          |                                                      |
| <b>Medication 3</b>                               |                            |                            |                                                      |
| Type                                              |                            | Stereotactic               |                                                      |
| Start (months from initial diagnosis)             |                            | 33                         |                                                      |
| Dosage                                            |                            | 2750                       |                                                      |
| End (months from initial diagnosis)               |                            | 33                         |                                                      |
| Description                                       |                            | Cyberknife                 |                                                      |
| Fraction                                          |                            | 5                          |                                                      |
| <b>Pathology</b>                                  |                            |                            |                                                      |
| <b>Surgery 1</b>                                  |                            |                            |                                                      |
| Date Of Report<br>(months from initial diagnosis) | 0                          | 0                          | 0                                                    |
| <b>Report</b>                                     |                            |                            |                                                      |
| Location                                          | Tissue: W10-1-1, SN183     | Tissue: W11-1-1, SN187     | Tissue: W12-1-1, SN191                               |
| Histopathology                                    | Glioblastoma, WHO grade IV | Glioblastoma, WHO grade IV | Glioblastoma, with small cell features, WHO grade IV |
| 1p19q_deletion                                    | positive                   | Negative                   | Negative                                             |
| EGFR                                              | gain                       | gain                       | amplification                                        |
| PTEN                                              | gain                       | loss                       | loss                                                 |
| MGMT PCR                                          | methylated                 | methylated                 | unmethylated                                         |
| MGMT IHC                                          | negative View Slides: A    | 50%                        | 20%                                                  |
| MGMT MS-MLPA:R1                                   | methylated (0.868646503)   | methylated (0.345438822)   | methylated (0.449555554)                             |
| MGMT MS-MLPA:R2                                   | unmethylated (0)           | unmethylated (0)           | unmethylated (0.148271849)                           |
| MGMT MS-MLPA:R3                                   | methylated (0.869387354)   | methylated (0.528812725)   | unmethylated (0.076863661)                           |
| IDH1 mutation                                     | R132H                      | wildtype                   | wildtype                                             |
| EGFR vIII                                         | not detected               | not detected               | not detected                                         |
| <b>Surgery 2</b>                                  |                            |                            |                                                      |

|                                                   |                                      |                                     |                                                   |
|---------------------------------------------------|--------------------------------------|-------------------------------------|---------------------------------------------------|
| Date Of Report<br>(months from initial diagnosis) |                                      |                                     | <u>Still surgery 1</u>                            |
| <b>Report</b>                                     |                                      |                                     |                                                   |
| Location                                          |                                      |                                     | Tissue: SN191-2                                   |
| Histopathology                                    |                                      |                                     | /                                                 |
| 1p19q_deletion                                    |                                      |                                     | /                                                 |
| EGFR                                              |                                      |                                     | /                                                 |
| PTEN                                              |                                      |                                     | /                                                 |
| MGMT PCR                                          |                                      |                                     | /                                                 |
| MGMT IHC                                          |                                      |                                     | /                                                 |
| MGMT MS-MLPA:R1                                   |                                      |                                     | unmethylated ()                                   |
| MGMT MS-MLPA:R2                                   |                                      |                                     | unmethylated ()                                   |
| MGMT MS-MLPA:R3                                   |                                      |                                     | unmethylated ()                                   |
| IDH1 mutation                                     |                                      |                                     | /                                                 |
| EGFR vIII                                         |                                      |                                     | /                                                 |
| <b>Follow-up Clinic Visit</b>                     |                                      |                                     |                                                   |
| <b>Visit 1</b>                                    |                                      |                                     |                                                   |
| Date of Visit (months from initial diagnosis)     | 0                                    | 0                                   | <i>Patient has no follow-up<br/>clinic visits</i> |
| KPS                                               | 100                                  | 100                                 |                                                   |
| Mini Mental Status Exam Score                     |                                      |                                     |                                                   |
| History of seizures since last visit              | No                                   | No                                  |                                                   |
| Neurologic Deficit                                | Yes. Right homonymous<br>hemianopia. | No                                  |                                                   |
| Symptoms Notes                                    | n/a                                  |                                     |                                                   |
| <b>Visit 2</b>                                    |                                      |                                     |                                                   |
| Date of Visit (months from initial diagnosis)     | 0                                    | 0                                   |                                                   |
| KPS                                               | 90                                   | 100                                 |                                                   |
| Mini Mental Status Exam Score                     |                                      |                                     |                                                   |
| History of seizures since last visit              | Yes                                  | Yes                                 |                                                   |
| Neurologic Deficit                                | Yes. Righ homonymous<br>hemianopia.  | Yes. Left homonymous<br>hemianopia. |                                                   |

|                                               |                                             |                                    |  |
|-----------------------------------------------|---------------------------------------------|------------------------------------|--|
| Symptoms Notes                                | Mild edema. Mild problems with fatigue.     | Stable disease.                    |  |
| <b>Visit 3</b>                                |                                             |                                    |  |
| Date of Visit (months from initial diagnosis) | 1                                           | 0                                  |  |
| KPS                                           | 90                                          | 100                                |  |
| Mini Mental Status Exam Score                 |                                             |                                    |  |
| History of seizures since last visit          | No                                          | No                                 |  |
| Neurologic Deficit                            | Yes. Right homonymous hemianopia.           | No. Left homonymous hemianopia.    |  |
| Symptoms Notes                                | n/a                                         | No new problems to report.         |  |
| <b>Visit 4</b>                                |                                             |                                    |  |
| Date of Visit (months from initial diagnosis) | 1                                           | 0                                  |  |
| KPS                                           | 90                                          | 90                                 |  |
| Mini Mental Status Exam Score                 |                                             | 30                                 |  |
| History of seizures since last visit          | No                                          | No                                 |  |
| Neurologic Deficit                            | Yes. Right homonymous hemianopia.           | Yes. Left visual field extinction. |  |
| Symptoms Notes                                | /                                           | n/a                                |  |
| <b>Visit 5</b>                                |                                             |                                    |  |
| Date of Visit (months from initial diagnosis) | 2                                           | 1                                  |  |
| KPS                                           | 90                                          | 90                                 |  |
| Mini Mental Status Exam Score                 |                                             |                                    |  |
| History of seizures since last visit          | No                                          | Yes                                |  |
| Neurologic Deficit                            | Yes. Right homonymous hemianopia.           | Yes. Left visual field extinction. |  |
| Symptoms Notes                                | Persistent headaches throughout treatments. | Head pressure, minor nausea.       |  |
| <b>Visit 6</b>                                |                                             |                                    |  |
| Date of Visit (months from initial diagnosis) | 2                                           | 1                                  |  |
| KPS                                           | 90                                          | 80                                 |  |
| Mini Mental Status Exam Score                 |                                             |                                    |  |

|                                               |                                                                                                           |                                                                                                                                                  |  |
|-----------------------------------------------|-----------------------------------------------------------------------------------------------------------|--------------------------------------------------------------------------------------------------------------------------------------------------|--|
| History of seizures since last visit          | No                                                                                                        | No                                                                                                                                               |  |
| Neurologic Deficit                            | Yes. Right homonymous hemianopia.                                                                         | Yes. Left visual field extinction.                                                                                                               |  |
| Symptoms Notes                                | n/a                                                                                                       | Blurry vision, decreased balance and issues with ability to mentate. Reports feeling woozy. Fatigued from treatment. Not sleeping well at night. |  |
| <b>Visit 7</b>                                |                                                                                                           |                                                                                                                                                  |  |
| Date of Visit (months from initial diagnosis) | 8                                                                                                         | 2                                                                                                                                                |  |
| KPS                                           | 80                                                                                                        | 90                                                                                                                                               |  |
| Mini Mental Status Exam Score                 |                                                                                                           |                                                                                                                                                  |  |
| History of seizures since last visit          | No                                                                                                        | No                                                                                                                                               |  |
| Neurologic Deficit                            | Yes. Right homonymous hemianopia.                                                                         | Yes. Left visual field extinction.                                                                                                               |  |
| Symptoms Notes                                | Lightheadedness, some nausea. The headaches are sometimes worse in the morning. Depression, muscle aches. | Vague sense of malaise, no specific complaints referable to treatment.                                                                           |  |
| <b>Visit 8</b>                                |                                                                                                           |                                                                                                                                                  |  |
| Date of Visit (months from initial diagnosis) | 9                                                                                                         | 3                                                                                                                                                |  |
| KPS                                           | 80                                                                                                        |                                                                                                                                                  |  |
| Mini Mental Status Exam Score                 |                                                                                                           | 30                                                                                                                                               |  |
| History of seizures since last visit          | No                                                                                                        | No                                                                                                                                               |  |
| Neurologic Deficit                            | Yes. Right homonymous hemianopia.                                                                         | Yes. Left visual field extinction.                                                                                                               |  |
| Symptoms Notes                                | n/a                                                                                                       | Cognitive difficulties. Failed an attempted dexamethasone taper and is now back on 1 mg twice a day.                                             |  |
| <b>Visit 9</b>                                |                                                                                                           |                                                                                                                                                  |  |



|                                               |                                                                                                                                  |                                                                                                                                                           |  |
|-----------------------------------------------|----------------------------------------------------------------------------------------------------------------------------------|-----------------------------------------------------------------------------------------------------------------------------------------------------------|--|
| Date of Visit (months from initial diagnosis) | 11                                                                                                                               | 4                                                                                                                                                         |  |
| KPS                                           | 80                                                                                                                               | 80                                                                                                                                                        |  |
| Mini Mental Status Exam Score                 |                                                                                                                                  |                                                                                                                                                           |  |
| History of seizures since last visit          | No                                                                                                                               | No                                                                                                                                                        |  |
| Neurologic Deficit                            | Yes. Right homonymous hemianopia.                                                                                                | Yes. Left visual field extinction.                                                                                                                        |  |
| Symptoms Notes                                | Some numbness/tingling, which she periodically has in the mornings and less in the afternoons. Depression.                       | Fatigue, malaise, and low-grade constant nausea have steadily worsened. Wants to get off of Temodar to see if quality of life will improve by any degree. |  |
| <b>Visit 10</b>                               |                                                                                                                                  |                                                                                                                                                           |  |
| Date of Visit (months from initial diagnosis) | 12                                                                                                                               | 5                                                                                                                                                         |  |
| KPS                                           | 80                                                                                                                               | 80                                                                                                                                                        |  |
| Mini Mental Status Exam Score                 |                                                                                                                                  | 29                                                                                                                                                        |  |
| History of seizures since last visit          | No                                                                                                                               | No                                                                                                                                                        |  |
| Neurologic Deficit                            | Yes. Right homonymous hemianopia.                                                                                                | Yes. Left visual field deficit.                                                                                                                           |  |
| Symptoms Notes                                | Experienced a couple of severe headaches over the past week. These headaches were diffuse and time-limited to a couple of hours. | Had new transient increase in headache, difficulties with TMZ, which has been discontinued.                                                               |  |
| <b>Visit 11</b>                               |                                                                                                                                  |                                                                                                                                                           |  |
| Date of Visit (months from initial diagnosis) | 12                                                                                                                               | 5                                                                                                                                                         |  |
| KPS                                           | 80                                                                                                                               | 90                                                                                                                                                        |  |
| Mini Mental Status Exam Score                 |                                                                                                                                  |                                                                                                                                                           |  |
| History of seizures since last visit          | No                                                                                                                               | No                                                                                                                                                        |  |
| Neurologic Deficit                            | Yes. Right homonymous hemianopia.                                                                                                | Yes. Left visual field deficit.                                                                                                                           |  |

|                                               |                                                                                  |                                                                                                     |  |
|-----------------------------------------------|----------------------------------------------------------------------------------|-----------------------------------------------------------------------------------------------------|--|
| Symptoms Notes                                | Gets headaches from Temodar. No depression. Lightheadedness, numbness, tingling. | Quality of life has substantially improved over the last month, especially after discontinuing TMZ. |  |
| <b>Visit 12</b>                               |                                                                                  |                                                                                                     |  |
| Date of Visit (months from initial diagnosis) | 13                                                                               | 7                                                                                                   |  |
| KPS                                           | 80                                                                               |                                                                                                     |  |
| Mini Mental Status Exam Score                 |                                                                                  | 29                                                                                                  |  |
| History of seizures since last visit          | No                                                                               | No                                                                                                  |  |
| Neurologic Deficit                            | Yes. Right homonymous hemianopia.                                                | Yes. Left homonymous hemianopia.                                                                    |  |
| Symptoms Notes                                | n/a                                                                              | Clinically stable, although there is disease progression.                                           |  |
| <b>Visit 13</b>                               |                                                                                  |                                                                                                     |  |
| Date of Visit (months from initial diagnosis) | 13                                                                               | 8                                                                                                   |  |
| KPS                                           | 80                                                                               | 90                                                                                                  |  |
| Mini Mental Status Exam Score                 |                                                                                  |                                                                                                     |  |
| History of seizures since last visit          | No                                                                               | No                                                                                                  |  |
| Neurologic Deficit                            | Yes. Right homonymous hemianopia.                                                | No. Left homonymous hemianopia.                                                                     |  |
| Symptoms Notes                                | Nausea is controlled well with p.r.n. antiemetics.                               | Denies any difficulty with the Avastin with nausea, vomiting, or diarrhea. No new complaints.       |  |
| <b>Visit 14</b>                               |                                                                                  |                                                                                                     |  |
| Date of Visit (months from initial diagnosis) | 14                                                                               | 9                                                                                                   |  |
| KPS                                           | 80                                                                               | 90                                                                                                  |  |
| Mini Mental Status Exam Score                 |                                                                                  |                                                                                                     |  |
| History of seizures since last visit          | No                                                                               | No                                                                                                  |  |
| Neurologic Deficit                            | Yes. Right homonymous hemianopia.                                                | Yes. Left homonymous hemianopia.                                                                    |  |

|                                               |                                                         |                                  |  |
|-----------------------------------------------|---------------------------------------------------------|----------------------------------|--|
| Symptoms Notes                                | n/a                                                     | No new neurological complaints.  |  |
| <b>Visit 15</b>                               |                                                         |                                  |  |
| Date of Visit (months from initial diagnosis) | 16                                                      | 9                                |  |
| KPS                                           | 70                                                      | 90                               |  |
| Mini Mental Status Exam Score                 |                                                         |                                  |  |
| History of seizures since last visit          | No                                                      | No                               |  |
| Neurologic Deficit                            | Yes. Right homonymous hemianopia.                       | Yes. Left homonymous hemianopia. |  |
| Symptoms Notes                                | Intermittent headaches, some worsening of coordination. | n/a                              |  |
| <b>Visit 16</b>                               |                                                         |                                  |  |
| Date of Visit (months from initial diagnosis) | 19                                                      | 10                               |  |
| KPS                                           | 70                                                      | 90                               |  |
| Mini Mental Status Exam Score                 |                                                         |                                  |  |
| History of seizures since last visit          | No                                                      | No                               |  |
| Neurologic Deficit                            | Yes. Right homonymous hemianopia.                       | Yes. Left homonymous hemianopia. |  |
| Symptoms Notes                                | Some bruising, daily headaches.                         | n/a                              |  |
| <b>Visit 17</b>                               |                                                         |                                  |  |
| Date of Visit (months from initial diagnosis) | 22                                                      | 11                               |  |
| KPS                                           | 70                                                      | 80                               |  |
| Mini Mental Status Exam Score                 |                                                         |                                  |  |
| History of seizures since last visit          | No                                                      | No                               |  |
| Neurologic Deficit                            | Yes. Right homonymous hemianopia.                       | No                               |  |

|                                               |                                              |                                                                                                                                                |  |
|-----------------------------------------------|----------------------------------------------|------------------------------------------------------------------------------------------------------------------------------------------------|--|
| Symptoms Notes                                | Headaches, balance problems.                 | Continues to battle some mild nausea with the infusions, and occasional headaches, but these are unchanged over months, and readily tolerable. |  |
| <b>Visit 18</b>                               |                                              |                                                                                                                                                |  |
| Date of Visit (months from initial diagnosis) | 25                                           | 11                                                                                                                                             |  |
| KPS                                           | 70                                           | 80                                                                                                                                             |  |
| Mini Mental Status Exam Score                 |                                              |                                                                                                                                                |  |
| History of seizures since last visit          | No                                           | No                                                                                                                                             |  |
| Neurologic Deficit                            | Yes. Right homonymous hemianopia.            | No. Left homonymous hemianopia.                                                                                                                |  |
| Symptoms Notes                                | Mild dysmetria on the left, daily headaches. | /                                                                                                                                              |  |
| <b>Visit 19</b>                               |                                              |                                                                                                                                                |  |
| Date of Visit (months from initial diagnosis) | 28                                           | 12                                                                                                                                             |  |
| KPS                                           | 70                                           | 80                                                                                                                                             |  |
| Mini Mental Status Exam Score                 |                                              |                                                                                                                                                |  |
| History of seizures since last visit          | No                                           | Yes                                                                                                                                            |  |
| Neurologic Deficit                            | Yes. Right homonymous hemianopia.            | Yes. Left homonymous hemianopia.                                                                                                               |  |
| Symptoms Notes                                | Headache, neck pain.                         | Fatigue                                                                                                                                        |  |
| <b>Visit 20</b>                               |                                              |                                                                                                                                                |  |
| Date of Visit (months from initial diagnosis) | 33                                           | 17                                                                                                                                             |  |
| KPS                                           | 60                                           | 70                                                                                                                                             |  |
| Mini Mental Status Exam Score                 |                                              |                                                                                                                                                |  |
| History of seizures since last visit          | No                                           | No                                                                                                                                             |  |
| Neurologic Deficit                            | Yes. Right homonymous hemianopia.            | Yes. Left homonymous hemianopia.                                                                                                               |  |

|                                               |                                                                                                            |                                                                                                    |  |
|-----------------------------------------------|------------------------------------------------------------------------------------------------------------|----------------------------------------------------------------------------------------------------|--|
| Symptoms Notes                                | Difficulty with balance, mild dysmetria with right hand.                                                   | Disease is progressing, starting CCNU.                                                             |  |
| <b>Visit 21</b>                               |                                                                                                            |                                                                                                    |  |
| Date of Visit (months from initial diagnosis) | 41                                                                                                         | 21                                                                                                 |  |
| KPS                                           | 80                                                                                                         | 80                                                                                                 |  |
| Mini Mental Status Exam Score                 |                                                                                                            |                                                                                                    |  |
| History of seizures since last visit          | No                                                                                                         | No                                                                                                 |  |
| Neurologic Deficit                            | No                                                                                                         | Yes. Left homonymous hemianopia.                                                                   |  |
| Symptoms Notes                                | No residual enhancement and there is no change or any sign of tumor recurrence.                            | Stabilized from clinical standpoint and the new MRI scan shows no evidence of further progression. |  |
| <b>Visit 22</b>                               |                                                                                                            |                                                                                                    |  |
| Date of Visit (months from initial diagnosis) | 45                                                                                                         | 23                                                                                                 |  |
| KPS                                           | 70                                                                                                         | 70                                                                                                 |  |
| Mini Mental Status Exam Score                 |                                                                                                            |                                                                                                    |  |
| History of seizures since last visit          | No                                                                                                         | No                                                                                                 |  |
| Neurologic Deficit                            | No                                                                                                         | Yes. Left homonymous hemianopia.                                                                   |  |
| Symptoms Notes                                | Patient has no significant new symptoms or problems. She has chronic headache related to her glioblastoma. | Mild clinical deterioration.                                                                       |  |
| <b>Visit 23</b>                               |                                                                                                            |                                                                                                    |  |
| Date of Visit (months from initial diagnosis) | 53                                                                                                         | 24                                                                                                 |  |
| KPS                                           | 70                                                                                                         | 80                                                                                                 |  |
| Mini Mental Status Exam Score                 |                                                                                                            |                                                                                                    |  |
| History of seizures since last visit          | No                                                                                                         | No                                                                                                 |  |
| Neurologic Deficit                            | No                                                                                                         | No                                                                                                 |  |

|                                               |                                                                |                                                                                |  |
|-----------------------------------------------|----------------------------------------------------------------|--------------------------------------------------------------------------------|--|
| Symptoms Notes                                | She reports that she is doing well and without new complaints. | n/a                                                                            |  |
| <b>Visit 24</b>                               |                                                                |                                                                                |  |
| Date of Visit (months from initial diagnosis) | 59                                                             | 26                                                                             |  |
| KPS                                           |                                                                | 80                                                                             |  |
| Mini Mental Status Exam Score                 |                                                                |                                                                                |  |
| History of seizures since last visit          | No                                                             | No                                                                             |  |
| Neurologic Deficit                            | No                                                             | Yes. Left homonymous hemianopia.                                               |  |
| Symptoms Notes                                | Follow-up visit.                                               | No new problems.                                                               |  |
| <b>Visit 25</b>                               |                                                                |                                                                                |  |
| Date of Visit (months from initial diagnosis) |                                                                | 30                                                                             |  |
| KPS                                           |                                                                | 80                                                                             |  |
| Mini Mental Status Exam Score                 |                                                                |                                                                                |  |
| History of seizures since last visit          |                                                                | No                                                                             |  |
| Neurologic Deficit                            |                                                                | Yes. Left homonymous hemianopia.                                               |  |
| Symptoms Notes                                |                                                                | New MRI data is consistent with stable disease.                                |  |
| <b>Visit 26</b>                               |                                                                |                                                                                |  |
| Date of Visit (months from initial diagnosis) |                                                                | 31                                                                             |  |
| KPS                                           |                                                                | 70                                                                             |  |
| Mini Mental Status Exam Score                 |                                                                |                                                                                |  |
| History of seizures since last visit          |                                                                | No                                                                             |  |
| Neurologic Deficit                            |                                                                | Yes. Left homonymous hemianopia.                                               |  |
| Symptoms Notes                                |                                                                | Deteriorating left leg function; dragging his leg more and has had some falls. |  |

|                                               |    |                                                                    |    |
|-----------------------------------------------|----|--------------------------------------------------------------------|----|
| <b>Visit 27</b>                               |    |                                                                    |    |
| Date of Visit (months from initial diagnosis) |    | 32                                                                 |    |
| KPS                                           |    | 60                                                                 |    |
| Mini Mental Status Exam Score                 |    |                                                                    |    |
| History of seizures since last visit          |    | No                                                                 |    |
| Neurologic Deficit                            |    | Yes. Left homonymous hemianopsia, left hemiparesis.                |    |
| Symptoms Notes                                |    | Worsening left hemiparesis; disease may be progressing on Avastin. |    |
| <b>Clinical Trials</b>                        |    |                                                                    |    |
| 1                                             | // | //                                                                 | // |

| <b>Patient ID</b>                    | <b>W13-1-1</b>       | <b>W16-1-1</b>                         | <b>W19-1-1</b>       |
|--------------------------------------|----------------------|----------------------------------------|----------------------|
| <b>Patient Information</b>           |                      |                                        |                      |
| Gender                               | Female               | Male                                   | Female               |
| Age at Initial Diagnosis             | 60                   | 77                                     | 68                   |
| Weight                               | 95 kg                | 83 kg                                  | 65.722 kg            |
| Height                               | 160 cm               | 183,88                                 | 168.64 cm            |
| KPS                                  | 90 (?)               | 100 (?)                                | 80 (?)               |
| Mini Mental Status Exam Score        |                      |                                        |                      |
| History of Seizures Since Last Visit | No                   | No                                     | No                   |
| Neurologic Deficit                   | No                   | No                                     | No                   |
| Presentation Symptoms                | Personality changes. | Left hand weakness, cognitive changes. | Speech disturbances. |
| Time to Progression                  | 235 days             | 97 days                                | NA                   |
| Overall Survival                     | 250 days             | 353 days                               | 615 days             |
| Time to Last Follow-up               | NA                   | NA                                     | NA                   |
| Cause Of Death                       | Tumor progression    | Tumor progression                      | Tumor progression    |
| <b>Tumor Information</b>             |                      |                                        |                      |
| <b>Tumor 1</b>                       |                      |                                        |                      |
| Date (months from initial diagnosis) | 0                    | 0                                      | 0                    |
| Diagnosis                            | Astrocytic tumor     | Astrocytic tumor                       | Astrocytic tumor     |

|                                       |                           |                           |                           |
|---------------------------------------|---------------------------|---------------------------|---------------------------|
| Grade                                 | Glioblastoma WHO grade IV | Glioblastoma WHO grade IV | Glioblastoma WHO grade IV |
| Location                              | Right Parietal            | Right Frontal             | Left Temporal             |
| <b>Medications</b>                    |                           |                           |                           |
| <b>Medication 1</b>                   |                           |                           |                           |
| Category                              | Anti-epileptic            | Steroids                  | Anti-depressant           |
| Drug Name                             | Levetiracetam             | Dexamethasone             | Fluoxetine                |
| Start (months from initial diagnosis) | 0                         | -1                        | 0                         |
| Total Daily Dosage                    | 1000mg                    | 1mg daily oral            | 20mg QD                   |
| End (months from initial diagnosis)   | 0                         | 1                         | 0                         |
| <b>Medication 2</b>                   |                           |                           |                           |
| Category                              | Steroids                  | Anti-epileptic            | Steroids                  |
| Drug Name                             | Dexamethasone             | Phenytoin                 | Dexamethasone             |
| Start (months from initial diagnosis) | 0                         | 0                         | 0                         |
| Total Daily Dosage                    | 4-16mg                    | 300mg                     | 2-16mg                    |
| End (months from initial diagnosis)   | 8                         | 0                         | 2                         |
| <b>Medication 3</b>                   |                           |                           |                           |
| Category                              | Anti-depressant           | Multi-vitamin             | Anti-epileptic            |
| Drug Name                             | Quetiapine                | ONE-A-DAY                 | Phenytoin                 |
| Start (months from initial diagnosis) | 0                         | 0                         | 0                         |
| Total Daily Dosage                    | 12.5-25mg                 | 1cap daily oral           | 300mg                     |
| End (months from initial diagnosis)   | 1                         | 0                         | 0                         |
| <b>Medication 4</b>                   |                           |                           |                           |
| Category                              | Anti-epileptic            | Anti-depressant           | Cholesterol Lowering      |
| Drug Name                             | Divalproex                | Mirtazapine               | Simvastatin               |
| Start (months from initial diagnosis) | 0                         | 0                         | 0                         |
| Total Daily Dosage                    | 125-1000mg                | 15mg                      | 80mg                      |
| End (months from initial diagnosis)   | 1                         | 3                         | 0                         |
| <b>Medication 5</b>                   |                           |                           |                           |
| Category                              | Anti-depressant           | Anti-epileptic            | Antihypertensive          |
| Drug Name                             | Risperidone               | KEPPRA                    | Diltiazem                 |
| Start (months from initial diagnosis) | 0                         | 0                         | 0                         |
| Total Daily Dosage                    | 0.5-1.5mg                 | 1000mg                    | 120mg                     |
| End (months from initial diagnosis)   | 7                         | 3                         | 0                         |
| <b>Medication 6</b>                   |                           |                           |                           |
| Category                              | Anti-epileptic            | Cholesterol Lowering      | Antihypertensive          |



|                                                 |                           |                           |                           |
|-------------------------------------------------|---------------------------|---------------------------|---------------------------|
| Drug Name                                       | Fosphenytoin              | Warfarin                  | Hydrochlorothiazide       |
| Start (months from initial diagnosis)           | 7                         | 0                         | 0                         |
| Total Daily Dosage                              | 300-2000mg                | 2.8-7.5mg                 | 12.5mg                    |
| End (months from initial diagnosis)             | 8                         | 9                         | 0                         |
| <b>Medication 7</b>                             |                           |                           |                           |
| Category                                        | Anti-epileptic            |                           | Anti-epileptic            |
| Drug Name                                       | Lacosamide                |                           | KEPPRA                    |
| Start (months from initial diagnosis)           | 8                         |                           | 0                         |
| Total Daily Dosage                              | 100-200mg                 |                           | 1000mg                    |
| End (months from initial diagnosis)             | 8                         |                           | 2                         |
| <b>Medication 8</b>                             |                           |                           |                           |
| Category                                        |                           |                           | Cholesterol Lowering      |
| Drug Name                                       |                           |                           | Lovastatin                |
| Start (months from initial diagnosis)           |                           |                           | 1                         |
| Total Daily Dosage                              |                           |                           | 80mg                      |
| End (months from initial diagnosis)             |                           |                           | 1                         |
| <b>Surgery</b>                                  |                           |                           |                           |
| <b>Surgery 1</b>                                |                           |                           |                           |
| Date of Surgery (months from initial diagnosis) | 0                         | 0                         | 0                         |
| Gliadel                                         | No                        | No                        | No                        |
| Awake mapping                                   | No                        | Yes                       | Yes                       |
| Stealth scan                                    | Yes                       | Yes                       | Yes                       |
| <b>Tissue Diagnosis</b>                         |                           |                           |                           |
| <b>Tissue 1</b>                                 |                           |                           |                           |
| Serial Number                                   | W13-1-1, SN195            | W16-1-1, SN206            | W19-1-1, SN214            |
| Diagnosis                                       | Glioblastoma WHO grade IV | Glioblastoma WHO grade IV | Glioblastoma WHO grade IV |
| Location                                        | Right Parietal            | Right Frontal             | Left Temporal             |
| Extent                                          | Complete resection        | Complete resection        | Complete resection        |
| MRI confirmation                                | Yes                       | Yes                       | Yes                       |
| <b>Tissue 2</b>                                 | <u>Still surgery 1</u>    |                           |                           |
| Serial Number                                   | SN195-2                   |                           |                           |
| Diagnosis                                       | Normal                    |                           |                           |

|                                       |                      |                             |                         |
|---------------------------------------|----------------------|-----------------------------|-------------------------|
| Location                              | Right Parietal       |                             |                         |
| Extent                                | Complete resection   |                             |                         |
| MRI confirmation                      | Yes                  |                             |                         |
| <b>Chemotherapy</b>                   |                      |                             |                         |
| <b>Medication 1</b>                   |                      |                             |                         |
| Drug Name                             | Temozolomide         | Temozolomide                | Temozolomide            |
| Start (months from initial diagnosis) | 1                    | 0                           | 1                       |
| Dosage                                | 140mg                | 150mg                       | 130mg                   |
| End (months from initial diagnosis)   | 2                    | 3                           | 2                       |
| Description                           | Concurrent           | Daily oral during radiation | Concurrent              |
| <b>Medication 2</b>                   |                      |                             |                         |
| Drug Name                             | Temozolomide         |                             |                         |
| Start (months from initial diagnosis) | 2                    |                             |                         |
| Dosage                                | 140mg                |                             |                         |
| End (months from initial diagnosis)   | 8                    |                             |                         |
| Description                           | Maintenance 21x/mo   |                             |                         |
| <b>Radiation Therapy</b>              |                      |                             |                         |
| <b>Medication 1</b>                   |                      |                             |                         |
| Type                                  | IMRT                 | IMRT                        | IMRT                    |
| Start (months from initial diagnosis) | 2                    | 0                           | 1                       |
| Dosage                                | 5940 cGy             | 4500 cGy                    | 4600 cGy                |
| End (months from initial diagnosis)   | 2                    | 1                           | 2                       |
| Description                           | Concurrent w/temodar | Concurrent                  | Concurrent              |
| Fraction                              | 33                   | 25                          | 23                      |
| <b>Medication 2</b>                   |                      |                             |                         |
| Type                                  |                      | IMRT                        | IMRT                    |
| Start (months from initial diagnosis) |                      | 1                           | 2                       |
| Dosage                                |                      | 1440 cGy                    | 1200 cGy                |
| End (months from initial diagnosis)   |                      | 2                           | 2                       |
| Description                           |                      | Boost                       | Concurrent              |
| Fraction                              |                      | 8                           | 6/7 fractions completed |
| <b>Pathology</b>                      |                      |                             |                         |
| <b>Surgerv 1</b>                      |                      |                             |                         |

|                                                   |                        |                                                      |                            |
|---------------------------------------------------|------------------------|------------------------------------------------------|----------------------------|
| Date Of Report<br>(months from initial diagnosis) | 0                      | 0                                                    | 0                          |
| <b>Report</b>                                     |                        |                                                      |                            |
| Location                                          | Tissue: W13-1-1, SN195 | Tissue: W16-1-1, SN206                               | Tissue: W19-1-1, SN214     |
| Histopathology                                    | Glioblastoma           | Glioblastoma, with small cell features, WHO grade IV | Glioblastoma, WHO grade IV |
| 1p19q_deletion                                    | Negative               | Negative                                             | Negative                   |
| EGFR                                              | amplification          | amplification                                        | gain                       |
| PTEN                                              | loss                   | loss                                                 | negative                   |
| MGMT PCR                                          | unmethylated           | unmethylated                                         | unmethylated               |
| MGMT IHC                                          | 50%                    | 25%                                                  | 30%                        |
| MGMT MS-MLPA:R1                                   | unmethylated (0.16)    | unmethylated (0.15)                                  | methylated (0.82)          |
| MGMT MS-MLPA:R2                                   | unmethylated (0.03)    | unmethylated (0.03)                                  | unmethylated (0.14)        |
| MGMT MS-MLPA:R3                                   | unmethylated (0)       | unmethylated (0.03)                                  | unmethylated (0.07)        |
| IDH1 mutation                                     | wildtype               | wildtype                                             | wildtype                   |
| EGFR vIII                                         | detected               | detected                                             | not detected               |
| <b>Surgery 2</b>                                  |                        |                                                      |                            |
| Date Of Report<br>(months from initial diagnosis) | <u>Still Surgery 1</u> |                                                      |                            |
| <b>Report</b>                                     |                        |                                                      |                            |
| Location                                          | Tissue: SN195-2        |                                                      |                            |
| Histopathology                                    |                        |                                                      |                            |
| 1p19q_deletion                                    |                        |                                                      |                            |
| EGFR                                              |                        |                                                      |                            |
| PTEN                                              |                        |                                                      |                            |
| MGMT PCR                                          |                        |                                                      |                            |
| MGMT IHC                                          |                        |                                                      |                            |
| MGMT MS-MLPA:R1                                   | methylated (0.34)      |                                                      |                            |
| MGMT MS-MLPA:R2                                   | unmethylated (0.06)    |                                                      |                            |
| MGMT MS-MLPA:R3                                   | unmethylated (0.02)    |                                                      |                            |
| IDH1 mutation                                     |                        |                                                      |                            |
| EGFR vIII                                         |                        |                                                      |                            |
| <b>Follow-up Clinic Visit</b>                     |                        |                                                      |                            |

|                                               |                                                   |                                                                                                             |                                                          |
|-----------------------------------------------|---------------------------------------------------|-------------------------------------------------------------------------------------------------------------|----------------------------------------------------------|
| <b>Visit 1</b>                                |                                                   |                                                                                                             |                                                          |
| Date of Visit (months from initial diagnosis) | 1                                                 | 3                                                                                                           | 0                                                        |
| KPS                                           | 90                                                | 90                                                                                                          | 80                                                       |
| Mini Mental Status Exam Score                 |                                                   |                                                                                                             |                                                          |
| History of seizures since last visit          | No                                                | No                                                                                                          | No                                                       |
| Neurologic Deficit                            | Yes. Right mild visual field cut.                 | No                                                                                                          | Yes. Left sided hemiparesis.                             |
| Symptoms Notes                                | n/a                                               | He has done reasonably well with only moderate fatigue associated with his radiation and Temodar treatment. | Occasional problems with word finding. Slight imbalance. |
| <b>Visit 2</b>                                |                                                   |                                                                                                             |                                                          |
| Date of Visit (months from initial diagnosis) | 2                                                 | 3                                                                                                           | 3                                                        |
| KPS                                           | 90                                                | 80                                                                                                          | 70                                                       |
| Mini Mental Status Exam Score                 |                                                   |                                                                                                             |                                                          |
| History of seizures since last visit          | No                                                | No                                                                                                          | No                                                       |
| Neurologic Deficit                            | Yes. Left field cut versus left neglect.          | No                                                                                                          | Yes. Left sided hemiparesis.                             |
| Symptoms Notes                                | Profound left neglect, although otherwise stable. | He has had some mild left-sided weakness but otherwise had not had any other serious symptoms.              | n/a                                                      |
| <b>Visit 3</b>                                |                                                   |                                                                                                             |                                                          |
| Date of Visit (months from initial diagnosis) | 2                                                 | 5                                                                                                           |                                                          |
| KPS                                           | 90                                                | 80                                                                                                          |                                                          |
| Mini Mental Status Exam Score                 |                                                   |                                                                                                             |                                                          |
| History of seizures since last visit          | No                                                | No                                                                                                          |                                                          |
| Neurologic Deficit                            | Yes. Left field cut versus left neglect.          | No                                                                                                          |                                                          |
| Symptoms Notes                                | Clinically stable.                                | Clinically doing fairly well, post-RT MRI shows enhancement; increase TMZ dosage.                           |                                                          |

|                                               |                                          |                                                                                            |  |
|-----------------------------------------------|------------------------------------------|--------------------------------------------------------------------------------------------|--|
| <b>Visit 4</b>                                |                                          |                                                                                            |  |
| Date of Visit (months from initial diagnosis) | 4                                        | 7                                                                                          |  |
| KPS                                           | 90                                       | 70                                                                                         |  |
| Mini Mental Status Exam Score                 |                                          |                                                                                            |  |
| History of seizures since last visit          | No                                       | No                                                                                         |  |
| Neurologic Deficit                            | Yes. Left field cut versus left neglect. | No                                                                                         |  |
| Symptoms Notes                                | Clinically stable.                       | Hospitalized for 3 days about a month ago, because of left hand/arm weakness and numbness. |  |
| <b>Visit 5</b>                                |                                          |                                                                                            |  |
| Date of Visit (months from initial diagnosis) | 4                                        | 9                                                                                          |  |
| KPS                                           | 80                                       | 60                                                                                         |  |
| Mini Mental Status Exam Score                 |                                          |                                                                                            |  |
| History of seizures since last visit          | No                                       | No                                                                                         |  |
| Neurologic Deficit                            | Yes. Left field cut versus left neglect. | No                                                                                         |  |
| Symptoms Notes                                | Notes more fatigue, otherwise stable.    | Numbness, tingling sensation, and unsteadiness.                                            |  |
| <b>Visit 6</b>                                |                                          |                                                                                            |  |
| Date of Visit (months from initial diagnosis) | 5                                        |                                                                                            |  |
| KPS                                           | 80                                       |                                                                                            |  |
| Mini Mental Status Exam Score                 |                                          |                                                                                            |  |
| History of seizures since last visit          | No                                       |                                                                                            |  |
| Neurologic Deficit                            | Yes. Left field cut versus left neglect. |                                                                                            |  |
| Symptoms Notes                                | More fatigue, otherwise unchanged.       |                                                                                            |  |
| <b>Visit 7</b>                                |                                          |                                                                                            |  |
| Date of Visit (months from initial diagnosis) | 6                                        |                                                                                            |  |
| KPS                                           | 80                                       |                                                                                            |  |

|                                               |                                                                                                                                   |    |    |
|-----------------------------------------------|-----------------------------------------------------------------------------------------------------------------------------------|----|----|
| Mini Mental Status Exam Score                 |                                                                                                                                   |    |    |
| History of seizures since last visit          | No                                                                                                                                |    |    |
| Neurologic Deficit                            | Yes. Left field cut versus left neglect.                                                                                          |    |    |
| Symptoms Notes                                | Notes more fatigue. She continues to have profound left neglect.                                                                  |    |    |
| <b>Visit 8</b>                                |                                                                                                                                   |    |    |
| Date of Visit (months from initial diagnosis) | 7                                                                                                                                 |    |    |
| KPS                                           | 70                                                                                                                                |    |    |
| Mini Mental Status Exam Score                 |                                                                                                                                   |    |    |
| History of seizures since last visit          | No                                                                                                                                |    |    |
| Neurologic Deficit                            | Yes. Left field cut versus left neglect.                                                                                          |    |    |
| Symptoms Notes                                | Has had more difficulty with incontinence, often requiring more assistance for transfers.                                         |    |    |
| <b>Visit 9</b>                                |                                                                                                                                   |    |    |
| Date of Visit (months from initial diagnosis) | 7                                                                                                                                 |    |    |
| KPS                                           | 60                                                                                                                                |    |    |
| Mini Mental Status Exam Score                 |                                                                                                                                   |    |    |
| History of seizures since last visit          | No                                                                                                                                |    |    |
| Neurologic Deficit                            | No                                                                                                                                |    |    |
| Symptoms Notes                                | Emergency room: patient had clonic activity of the left arm and to a lesser degree of the left leg. Patient status deteriorating. |    |    |
| <b>Clinical Trials</b>                        |                                                                                                                                   |    |    |
| 1                                             | //                                                                                                                                | // | // |

|                   |                |                |                        |
|-------------------|----------------|----------------|------------------------|
| <b>Patient ID</b> | <b>W20-2-1</b> | <b>W21-1-1</b> | <b>W22-1-1/W22-2-1</b> |
|-------------------|----------------|----------------|------------------------|

| Patient Information                  |                                                  |                                                                   |                                                                     |
|--------------------------------------|--------------------------------------------------|-------------------------------------------------------------------|---------------------------------------------------------------------|
| Gender                               | Male                                             | Female                                                            | Female                                                              |
| Age at Initial Diagnosis             | 44                                               | 55                                                                | 53                                                                  |
| Weight                               | 67.8 kg                                          | 62.143 kg                                                         | 73.03 kg                                                            |
| Height                               | 186.42 cm                                        | 166.1 cm                                                          | 155.94 cm                                                           |
| KPS                                  | 90 (?)                                           | 80 (?)                                                            | 90 (?)                                                              |
| Mini Mental Status Exam Score        |                                                  |                                                                   |                                                                     |
| History of Seizures Since Last Visit | No                                               | No                                                                | No                                                                  |
| Neurologic Deficit                   | No                                               | Yes. Left.                                                        | Yes. Left Right. Word finding difficulties, slurred speech.         |
| Presentation Symptoms                | Headaches, some mental confusion, and dizziness. | Constant headache, some weakness and clumsiness on the left side. | word finding difficulties, slurred speech and altered mental status |
| Time to Progression                  | 103 days                                         | 93 days                                                           | 753 days                                                            |
| Overall Survival                     | 363 days                                         | 446 days                                                          | NA                                                                  |
| Time to Last Follow-up               | NA                                               | NA                                                                | 1634 days                                                           |
| Cause Of Death                       | Tumor progression                                | Tumor progression                                                 | //                                                                  |
| Tumor Information                    |                                                  |                                                                   |                                                                     |
| Tumor 1                              |                                                  |                                                                   |                                                                     |
| Date (months from initial diagnosis) | 0                                                | 0                                                                 | 0                                                                   |
| Diagnosis                            | Astrocytic tumor                                 | Astrocytic tumor                                                  | Astrocytic tumor                                                    |
| Grade                                | Glioblastoma WHO grade IV                        | Glioblastoma WHO grade IV                                         | Glioblastoma WHO grade IV                                           |
| Location                             | Right Temporal                                   | Right Temporal                                                    | Left Temporal                                                       |
| Tumor 2                              |                                                  |                                                                   |                                                                     |
| Date (months from initial diagnosis) | 6                                                |                                                                   |                                                                     |
| Diagnosis                            | Astrocytic tumor                                 |                                                                   |                                                                     |
| Grade                                | Glioblastoma WHO grade IV                        |                                                                   |                                                                     |
| Location                             | Right Parietal Right Temporal                    |                                                                   |                                                                     |
| Medications                          |                                                  |                                                                   |                                                                     |
| Medication 1                         |                                                  |                                                                   |                                                                     |
| Category                             | Anti-epileptic                                   | Steroids                                                          | Anti-epileptic                                                      |

|                                       |                      |                                                  |                         |
|---------------------------------------|----------------------|--------------------------------------------------|-------------------------|
| Drug Name                             | KEPPRA               | Dexamethasone                                    | KEPPRA                  |
| Start (months from initial diagnosis) | 3                    | -1                                               | -1                      |
| Total Daily Dosage                    | 1000-750mg 2x/d oral | 2-16mg                                           | 500mg BID               |
| End (months from initial diagnosis)   | 8                    | 0                                                | 0                       |
| <b>Medication 2</b>                   |                      |                                                  |                         |
| Category                              | Steroids             | Anti-epileptic                                   | Steroids                |
| Drug Name                             | Dexamethasone        | Fosphenytoin (CEREBYX)                           | Dexamethasone           |
| Start (months from initial diagnosis) | 6                    | -1                                               | 0                       |
| Total Daily Dosage                    | 2-16mg               | 1000mg in NS(0.9%NaCl)<br>IV solution 100mg once | 4mg QID taper to 3mg QD |
| End (months from initial diagnosis)   | 8                    | //                                               | 1                       |
| <b>Medication 3</b>                   |                      |                                                  |                         |
| Category                              |                      | Anti-epileptic                                   | Anti-epileptic          |
| Drug Name                             |                      | KEPPRA                                           | KEPPRA                  |
| Start (months from initial diagnosis) |                      | -1                                               | 0                       |
| Total Daily Dosage                    |                      | 750-1000-2000mg oral 2x/d                        | 1000mg 2x/d oral        |
| End (months from initial diagnosis)   |                      | 0                                                | 3                       |
| <b>Medication 4</b>                   |                      |                                                  |                         |
| Category                              |                      | Antihypertensive                                 | Anti-epileptic          |
| Drug Name                             |                      | Hydrochlorothiazide                              | KEPPRA                  |
| Start (months from initial diagnosis) |                      | -1                                               | 3                       |
| Total Daily Dosage                    |                      | 12.5mg                                           | 500mg 2x/d oral         |
| End (months from initial diagnosis)   |                      | 0                                                | 25                      |
| <b>Medication 5</b>                   |                      |                                                  |                         |
| Category                              |                      | Anti-depressant                                  | Anti-depressant         |
| Drug Name                             |                      | Quetiapine                                       | Amitriptyline           |
| Start (months from initial diagnosis) |                      | -1                                               | 12                      |
| Total Daily Dosage                    |                      | 50-150mg                                         | 25mg QD                 |
| End (months from initial diagnosis)   |                      | 0                                                | 13                      |
| <b>Medication 6</b>                   |                      |                                                  |                         |
| Category                              |                      | Antihypertensive                                 | Steroids                |
| Drug Name                             |                      | Olmesartan                                       | Dexamethasone           |
| Start (months from initial diagnosis) |                      | 0                                                | 25                      |
| Total Daily Dosage                    |                      | 10mg daily oral                                  | 4mg 4x/d, 4mh 3x/d      |
| End (months from initial diagnosis)   |                      | 0                                                | 26                      |



|                                                 |    |                      |                  |
|-------------------------------------------------|----|----------------------|------------------|
| <b>Medication 7</b>                             |    |                      |                  |
| Category                                        |    | Anti-epileptic       | Anti-epileptic   |
| Drug Name                                       |    | Phenytoin            | KEPPRA           |
| Start (months from initial diagnosis)           |    | 0                    | 25               |
| Total Daily Dosage                              |    | 400-500mg            | 1000mg 2x/d oral |
| End (months from initial diagnosis)             |    | 4                    | 38               |
| <b>Medication 8</b>                             |    |                      |                  |
| Category                                        |    | Steroids             | Steroids         |
| Drug Name                                       |    | Dexamethasone        | Dexamethasone    |
| Start (months from initial diagnosis)           |    | 3                    | 30               |
| Total Daily Dosage                              |    | 2mg daily oral       | 1mg 2x/d oral    |
| End (months from initial diagnosis)             |    | 4                    | 33               |
| <b>Medication 9</b>                             |    |                      |                  |
| Category                                        |    | Anti-epileptic       | Anti-epileptic   |
| Drug Name                                       |    | KEPPRA               | KEPPRA           |
| Start (months from initial diagnosis)           |    | 4                    | 38               |
| Total Daily Dosage                              |    | 500mg 2x/d oral      | 500mg 2x/d oral  |
| End (months from initial diagnosis)             |    | 5                    | 55               |
| <b>Medication 10</b>                            |    |                      |                  |
| Category                                        |    | Cholesterol Lowering |                  |
| Drug Name                                       |    | Rosuvastatin         |                  |
| Start (months from initial diagnosis)           |    | 4                    |                  |
| Total Daily Dosage                              |    | 10mg                 |                  |
| End (months from initial diagnosis)             |    | 5                    |                  |
| <b>Medication 11</b>                            |    |                      |                  |
| Category                                        |    | Steroids             |                  |
| Drug Name                                       |    | Dexamethasone        |                  |
| Start (months from initial diagnosis)           |    | 11                   |                  |
| Total Daily Dosage                              |    | 4mg 2x/d oral        |                  |
| End (months from initial diagnosis)             |    | 12                   |                  |
| <b>Surgery</b>                                  |    |                      |                  |
| <b>Surgery 1</b>                                |    |                      |                  |
| Date of Surgery (months from initial diagnosis) | 0  | 0                    | 0                |
| Gliadel                                         | No | No                   | No               |

|                                                 |                               |                                 |                                      |
|-------------------------------------------------|-------------------------------|---------------------------------|--------------------------------------|
| Awake mapping                                   | No                            | No                              | Yes                                  |
| Stealth scan                                    | Yes                           | Yes                             | Yes                                  |
| <b>Surgery 2</b>                                |                               |                                 |                                      |
| Date of Surgery (months from initial diagnosis) | 6                             |                                 | 25                                   |
| Gliadel                                         | No                            |                                 | No                                   |
| Awake mapping                                   | No                            |                                 | Yes                                  |
| Stealth scan                                    | Yes                           |                                 | Yes                                  |
| <b>Tissue Diagnosis</b>                         |                               |                                 |                                      |
| <b>Tissue 1</b>                                 |                               |                                 |                                      |
| Serial Number                                   |                               | W21-1-1, SN217                  | W22-1-1, SN218                       |
| Diagnosis                                       |                               | Glioblastoma WHO grade IV       | Glioblastoma WHO grade IV            |
| Location                                        |                               | Right Frontal-Parietal-Temporal | Left Temporal                        |
| Extent                                          |                               | Complete resection              | Complete resection                   |
| MRI confirmation                                |                               | Yes                             | Yes                                  |
| <b>Tissue 2</b>                                 | <u>Surgery 2</u>              |                                 |                                      |
| Serial Number                                   | W20-2-1, SN215                |                                 | W22-2-1, SN319                       |
| Diagnosis                                       | Glioblastoma WHO grade IV     |                                 | Anaplastic astrocytoma WHO grade III |
| Location                                        | Right Parietal Right Temporal |                                 | Left Temporal                        |
| Extent                                          | Complete resection            |                                 | Complete resection                   |
| MRI confirmation                                | Yes                           |                                 |                                      |
| <b>Chemotherapy</b>                             |                               |                                 |                                      |
| <b>Medication 1</b>                             |                               |                                 |                                      |
| Drug Name                                       | Temozolomide                  | Temozolomide                    | Temozolomide                         |
| Start (months from initial diagnosis)           | 1                             | 0                               | 0                                    |
| Dosage                                          | 75mg/m2                       | 150mg TD                        | 140mg                                |
| End (months from initial diagnosis)             | 2                             | 2                               | 3                                    |
| Description                                     | Maintenance                   | Concurrent                      | daily oral                           |
| <b>Medication 2</b>                             |                               |                                 |                                      |
| Drug Name                                       | Temozolomide                  | Temozolomide                    | Temozolomide                         |
| Start (months from initial diagnosis)           | 4                             | 3                               | 3                                    |

|                                       |            |                                               |                  |
|---------------------------------------|------------|-----------------------------------------------|------------------|
| Dosage                                | 140mg/day  | 120mg TD                                      | 340mg            |
| End (months from initial diagnosis)   | 6          | 9                                             | 13               |
| Description                           | Concurrent | maintenance 12x/mo                            | daily oral       |
| <b>Medication 3</b>                   |            |                                               |                  |
| Drug Name                             | Avastin    | Avastin                                       | Temozolomide     |
| Start (months from initial diagnosis) | 8          | 3                                             | 25               |
| Dosage                                |            | 525-620mg                                     | 125mg            |
| End (months from initial diagnosis)   | 11         | 10                                            | daily oral       |
| Description                           |            | in NS(0.9% NaCl) IV<br>solution every 2 weeks | 34               |
| <b>Medication 4</b>                   |            |                                               |                  |
| Drug Name                             |            |                                               | Temozolomide     |
| Start (months from initial diagnosis) |            |                                               | 34               |
| Dosage                                |            |                                               | 125mg            |
| End (months from initial diagnosis)   |            |                                               | 35               |
| Description                           |            |                                               | everyday for 21d |
| <b>Medication 5</b>                   |            |                                               |                  |
| Drug Name                             |            |                                               | Temozolomide     |
| Start (months from initial diagnosis) |            |                                               | 36               |
| Dosage                                |            |                                               | 125mg            |
| End (months from initial diagnosis)   |            |                                               | 36               |
| Description                           |            |                                               | everyday for 21d |
| <b>Medication 6</b>                   |            |                                               |                  |
| Drug Name                             |            |                                               | Temozolomide     |
| Start (months from initial diagnosis) |            |                                               | 37               |
| Dosage                                |            |                                               | 125mg            |
| End (months from initial diagnosis)   |            |                                               | 38               |
| Description                           |            |                                               | everyday for 21d |
| <b>Medication 7</b>                   |            |                                               |                  |
| Drug Name                             |            |                                               | Etoposide        |
| Start (months from initial diagnosis) |            |                                               | 40               |
| Dosage                                |            |                                               | 100mg daily oral |

|                                       |            |                                                    |                 |
|---------------------------------------|------------|----------------------------------------------------|-----------------|
| End (months from initial diagnosis)   |            |                                                    | 44              |
| Description                           |            |                                                    | at bedtime      |
| <b>Medication 8</b>                   |            |                                                    |                 |
| Drug Name                             |            |                                                    | Etoposide       |
| Start (months from initial diagnosis) |            |                                                    | 44              |
| Dosage                                |            |                                                    | 50mg daily oral |
| End (months from initial diagnosis)   |            |                                                    | 45              |
| Description                           |            |                                                    | at bedtime      |
| <b>Medication 9</b>                   |            |                                                    |                 |
| Drug Name                             |            |                                                    | Avastin         |
| Start (months from initial diagnosis) |            |                                                    | 46              |
| Dosage                                |            |                                                    | 665-700mg IV    |
| End (months from initial diagnosis)   |            |                                                    | 54              |
| Description                           |            |                                                    | every 2 weeks   |
| <b>Radiation Therapy</b>              |            |                                                    |                 |
| <b>Medication 1</b>                   |            |                                                    |                 |
| Type                                  | IMRT       | IMRT                                               | IMRT            |
| Start (months from initial diagnosis) | 1          | 0                                                  | 0               |
| Dosage                                | 4600 cGy   | 4500cGy                                            | 4600cGy         |
| End (months from initial diagnosis)   | 2          | 1                                                  | 1               |
| Description                           | Concurrent | To treat the tumor bed in the right temporal fossa | Concurrent      |
| Fraction                              | 23         | 25                                                 | 23              |
| <b>Medication 2</b>                   |            |                                                    |                 |
| Type                                  | IMRT       | IMRT                                               | IMRT            |
| Start (months from initial diagnosis) | 2          | 1                                                  | 1               |
| Dosage                                | 1400 cGy   | 1260cGy                                            | 1400cGy         |
| End (months from initial diagnosis)   | 2          | 2                                                  | 2               |
| Description                           | Boost      | Boost                                              | Boost           |
| Fraction                              | 7          | 7                                                  | 7               |
| <b>Medication 3</b>                   |            |                                                    |                 |
| Type                                  |            | Stereotactic                                       | ?               |
| Start (months from initial diagnosis) |            | 3                                                  | 27              |
| Dosage                                |            | 1000cGy                                            | 1500cGy         |
| End (months from initial diagnosis)   |            |                                                    | 27              |

|                                                   |                        |                                   |                                               |
|---------------------------------------------------|------------------------|-----------------------------------|-----------------------------------------------|
| Description                                       |                        | Cyberknife                        | //                                            |
| Fraction                                          |                        | 1                                 | 5                                             |
| <b>Medication 4</b>                               |                        |                                   |                                               |
| Type                                              |                        | Stereotactic                      |                                               |
| Start (months from initial diagnosis)             |                        | 9                                 |                                               |
| Dosage                                            |                        | 1000cGy                           |                                               |
| End (months from initial diagnosis)               |                        |                                   |                                               |
| Description                                       |                        | Cyberknife                        |                                               |
| Fraction                                          |                        | 1                                 |                                               |
| <b>Pathology</b>                                  |                        |                                   |                                               |
| <b>Surgery 1</b>                                  |                        |                                   |                                               |
| Date Of Report<br>(months from initial diagnosis) |                        | 12                                | 0                                             |
| <b>Report</b>                                     |                        |                                   |                                               |
| Location                                          |                        | Tissue: W21-1-1, SN217            | Tissue: W22-1-1, SN218                        |
| Histopathology                                    |                        | Glioblastoma                      | Edematous glioma                              |
| 1p19q_deletion                                    |                        | Negative                          | Negative                                      |
| EGFR                                              |                        | amplification in small population | amplification                                 |
| PTEN                                              |                        | loss                              | loss                                          |
| MGMT PCR                                          |                        | unmethylated                      | methylated                                    |
| MGMT IHC                                          |                        | 50%                               | 20%                                           |
| MGMT MS-MLPA:R1                                   |                        | unmethylated (0.23)               | unmethylated (0.22)                           |
| MGMT MS-MLPA:R2                                   |                        | unmethylated (0.03)               | unmethylated (0.00)                           |
| MGMT MS-MLPA:R3                                   |                        | unmethylated (0.02)               | methylated (0.67)                             |
| IDH1 mutation                                     |                        | wildtype                          | wildtype                                      |
| EGFR vIII                                         |                        | not detected                      | detected                                      |
| <b>Surgery 2</b>                                  |                        |                                   |                                               |
| Date Of Report<br>(months from initial diagnosis) | 6                      |                                   | 25                                            |
| <b>Report</b>                                     |                        |                                   |                                               |
| Location                                          | Tissue: W20-2-1, SN215 |                                   | Tissue: W22-2-1, SN319                        |
| Histopathology                                    | recurrent glioblastoma |                                   | Anaplastic astrocytoma,<br>WHO grade III / IV |

|                                               |                     |                                 |                      |
|-----------------------------------------------|---------------------|---------------------------------|----------------------|
| 1p19q_deletion                                | negative            |                                 | Negative             |
| EGFR                                          | gain                |                                 | amplification        |
| PTEN                                          | gain                |                                 | loss                 |
| MGMT PCR                                      | unmethylated        |                                 |                      |
| MGMT IHC                                      | 80%                 |                                 |                      |
| MGMT MS-MLPA:R1                               | methylated (0.5)    |                                 | unmethylated ()      |
| MGMT MS-MLPA:R2                               | unmethylated (0.05) |                                 | unmethylated ()      |
| MGMT MS-MLPA:R3                               | unmethylated (0.02) |                                 | unmethylated ()      |
| IDH1 mutation                                 | wildtype            |                                 |                      |
| EGFR vIII                                     | not detected        |                                 |                      |
| <b>Follow-up Clinic Visit</b>                 |                     |                                 |                      |
| <b>Visit 1</b>                                |                     |                                 |                      |
| Date of Visit (months from initial diagnosis) | 1                   | 0                               | 0                    |
| KPS                                           | 100                 | 90                              | 100                  |
| Mini Mental Status Exam Score                 |                     |                                 |                      |
| History of seizures since last visit          | No                  | No                              | No                   |
| Neurologic Deficit                            | No                  | No                              | No                   |
| Symptoms Notes                                | n/a                 | Blurred vision after diagnosis. | n/a. Chemo planning. |
| <b>Visit 2</b>                                |                     |                                 |                      |
| Date of Visit (months from initial diagnosis) | 2                   | 1                               | 3                    |
| KPS                                           | 100                 | 90                              | 100                  |
| Mini Mental Status Exam Score                 |                     |                                 |                      |
| History of seizures since last visit          | No                  | No                              | No                   |
| Neurologic Deficit                            | No                  | No                              | No                   |
| Symptoms Notes                                | //                  | n/a                             | n/a                  |
| <b>Visit 3</b>                                |                     |                                 |                      |
| Date of Visit (months from initial diagnosis) | 3                   | 1                               | 6                    |
| KPS                                           |                     | 90                              | 100                  |
| Mini Mental Status Exam Score                 | 29                  |                                 |                      |
| History of seizures since last visit          | No                  | No                              | No                   |

|                                               |                                                            |     |                                   |
|-----------------------------------------------|------------------------------------------------------------|-----|-----------------------------------|
| Neurologic Deficit                            | No                                                         | No  | No                                |
| Symptoms Notes                                | //                                                         | n/a | n/a                               |
| <b>Visit 4</b>                                |                                                            |     |                                   |
| Date of Visit (months from initial diagnosis) | 3                                                          | 1   | 12                                |
| KPS                                           |                                                            | 90  | 90                                |
| Mini Mental Status Exam Score                 | 30                                                         |     |                                   |
| History of seizures since last visit          | No                                                         | No  | Yes                               |
| Neurologic Deficit                            | No                                                         | No  | No                                |
| Symptoms Notes                                | Slight imbalance when walking.                             | n/a | n/a. MRI followup.                |
| <b>Visit 5</b>                                |                                                            |     |                                   |
| Date of Visit (months from initial diagnosis) | 4                                                          | 2   | 13                                |
| KPS                                           | 90                                                         | 90  | 90                                |
| Mini Mental Status Exam Score                 |                                                            |     |                                   |
| History of seizures since last visit          | Yes                                                        | No  | No                                |
| Neurologic Deficit                            | No                                                         | No  | No                                |
| Symptoms Notes                                | The Novacure device has caused some slight burns on scalp. | n/a | n/a. Post maint. Chemo. Followup. |
| <b>Visit 6</b>                                |                                                            |     |                                   |
| Date of Visit (months from initial diagnosis) | 5                                                          | 3   | 16                                |
| KPS                                           |                                                            | 80  | 90                                |
| Mini Mental Status Exam Score                 | 30                                                         |     |                                   |
| History of seizures since last visit          | No                                                         | No  | No                                |
| Neurologic Deficit                            | No                                                         | No  | No                                |
| Symptoms Notes                                | n/a                                                        | n/a | n/a. Post chemo MRI followup.     |
| <b>Visit 7</b>                                |                                                            |     |                                   |
| Date of Visit (months from initial diaonosis) | 5                                                          | 3   | 18                                |

|                                               |                                                                                                                                                                                                                                                                                     |     |                                                                                                                                                                       |
|-----------------------------------------------|-------------------------------------------------------------------------------------------------------------------------------------------------------------------------------------------------------------------------------------------------------------------------------------|-----|-----------------------------------------------------------------------------------------------------------------------------------------------------------------------|
| KPS                                           | 90                                                                                                                                                                                                                                                                                  | 80  | 90                                                                                                                                                                    |
| Mini Mental Status Exam Score                 |                                                                                                                                                                                                                                                                                     |     |                                                                                                                                                                       |
| History of seizures since last visit          | No                                                                                                                                                                                                                                                                                  | No  | No                                                                                                                                                                    |
| Neurologic Deficit                            | No                                                                                                                                                                                                                                                                                  | No  | No                                                                                                                                                                    |
| Symptoms Notes                                |                                                                                                                                                                                                                                                                                     | n/a | n/a. Post chemo MRI followup.                                                                                                                                         |
| <b>Visit 8</b>                                |                                                                                                                                                                                                                                                                                     |     |                                                                                                                                                                       |
| Date of Visit (months from initial diagnosis) | 6                                                                                                                                                                                                                                                                                   | 4   | 21                                                                                                                                                                    |
| KPS                                           |                                                                                                                                                                                                                                                                                     | 80  | 80                                                                                                                                                                    |
| Mini Mental Status Exam Score                 | 30                                                                                                                                                                                                                                                                                  |     |                                                                                                                                                                       |
| History of seizures since last visit          | Yes                                                                                                                                                                                                                                                                                 | No  | No                                                                                                                                                                    |
| Neurologic Deficit                            | No                                                                                                                                                                                                                                                                                  | No  | No                                                                                                                                                                    |
| Symptoms Notes                                | Increased headaches.                                                                                                                                                                                                                                                                | n/a | Some occasions where memory does not seem perfect. Post chemo MRI followup.                                                                                           |
| <b>Visit 9</b>                                |                                                                                                                                                                                                                                                                                     |     |                                                                                                                                                                       |
| Date of Visit (months from initial diagnosis) | 7                                                                                                                                                                                                                                                                                   | 4   | 24                                                                                                                                                                    |
| KPS                                           | 80                                                                                                                                                                                                                                                                                  | 80  | 80                                                                                                                                                                    |
| Mini Mental Status Exam Score                 |                                                                                                                                                                                                                                                                                     |     |                                                                                                                                                                       |
| History of seizures since last visit          | No                                                                                                                                                                                                                                                                                  | No  | No                                                                                                                                                                    |
| Neurologic Deficit                            | No                                                                                                                                                                                                                                                                                  | No  | No                                                                                                                                                                    |
| Symptoms Notes                                | Pleasant, awake, alert, cooperative, but markedly worse than when seen last. He presented 3 weeks ago with headaches and increasing psudeomeningocele over his craniotomy flap. Reports memory changes postop. He has a significant left vision field cut but otherwise feels well. | n/a | Deterioration in spontaneous language, word finding problems; mri shows signs of progressive disease.<br><br>planned: repeat craniotomy, Avastin, CCNU. MRI followup. |



|                                               |                                                                                                |     |                                                                                                             |
|-----------------------------------------------|------------------------------------------------------------------------------------------------|-----|-------------------------------------------------------------------------------------------------------------|
| <b>Visit 10</b>                               |                                                                                                |     |                                                                                                             |
| Date of Visit (months from initial diagnosis) | 8                                                                                              | 4   | 26                                                                                                          |
| KPS                                           | 70                                                                                             | 80  | 70                                                                                                          |
| Mini Mental Status Exam Score                 |                                                                                                |     |                                                                                                             |
| History of seizures since last visit          | No                                                                                             | No  | No                                                                                                          |
| Neurologic Deficit                            | Yes. Left sided weakness.                                                                      | No  | No                                                                                                          |
| Symptoms Notes                                | Increased confusion, increased left sided weakness.                                            | n/a | Difficulty in occasional word finding problems. vision deterioration. start TMZ 21 day cycle. MRI followup. |
| <b>Visit 11</b>                               |                                                                                                |     |                                                                                                             |
| Date of Visit (months from initial diagnosis) | 9                                                                                              | 5   | 32                                                                                                          |
| KPS                                           | 60                                                                                             | 80  | 80                                                                                                          |
| Mini Mental Status Exam Score                 |                                                                                                |     |                                                                                                             |
| History of seizures since last visit          | Yes                                                                                            | No  | No                                                                                                          |
| Neurologic Deficit                            | No                                                                                             | No  | No                                                                                                          |
| Symptoms Notes                                | Entered ER for altered mental status and seizure. Continuation of avastin depends on next MRI. | n/a | Is doing well from both clinical and radiographic standpoints                                               |
| <b>Visit 12</b>                               |                                                                                                |     |                                                                                                             |
| Date of Visit (months from initial diagnosis) | 10                                                                                             | 5   | 34                                                                                                          |
| KPS                                           | 70                                                                                             | 80  | 80                                                                                                          |
| Mini Mental Status Exam Score                 |                                                                                                |     |                                                                                                             |
| History of seizures since last visit          | No                                                                                             | No  | No                                                                                                          |
| Neurologic Deficit                            | No                                                                                             | No  | No                                                                                                          |

|                                               |     |                                                                                |                                                                                                                                                                                                                                                                                           |
|-----------------------------------------------|-----|--------------------------------------------------------------------------------|-------------------------------------------------------------------------------------------------------------------------------------------------------------------------------------------------------------------------------------------------------------------------------------------|
| Symptoms Notes                                | n/a | n/a                                                                            | Is now able to report the vision problem she has with reading. She describes a line of blurred vision across both eyes when she tries to focus on words. She denies diplopia. Her last vision exam was about 6 months ago. She feels her vision has no changed since her initial surgery. |
| <b>Visit 13</b>                               |     |                                                                                |                                                                                                                                                                                                                                                                                           |
| Date of Visit (months from initial diagnosis) |     | 6                                                                              | 36                                                                                                                                                                                                                                                                                        |
| KPS                                           |     | 80                                                                             | 80                                                                                                                                                                                                                                                                                        |
| Mini Mental Status Exam Score                 |     |                                                                                |                                                                                                                                                                                                                                                                                           |
| History of seizures since last visit          |     | No                                                                             | No                                                                                                                                                                                                                                                                                        |
| Neurologic Deficit                            |     | No                                                                             | No                                                                                                                                                                                                                                                                                        |
| Symptoms Notes                                |     | //                                                                             | Doing well, no new problems, no seizures                                                                                                                                                                                                                                                  |
| <b>Visit 14</b>                               |     |                                                                                |                                                                                                                                                                                                                                                                                           |
| Date of Visit (months from initial diagnosis) |     | 6                                                                              | 36                                                                                                                                                                                                                                                                                        |
| KPS                                           |     | 80                                                                             | 70                                                                                                                                                                                                                                                                                        |
| Mini Mental Status Exam Score                 |     |                                                                                |                                                                                                                                                                                                                                                                                           |
| History of seizures since last visit          |     | Yes                                                                            | No                                                                                                                                                                                                                                                                                        |
| Neurologic Deficit                            |     | Yes. Left upper lip numbness and droop.                                        | No                                                                                                                                                                                                                                                                                        |
| Symptoms Notes                                |     | One episode of left upper lip numbness and droop several days prior, resolved. | Replace with a new follow-up visit                                                                                                                                                                                                                                                        |
| <b>Visit 15</b>                               |     |                                                                                |                                                                                                                                                                                                                                                                                           |
| Date of Visit (months from initial diagnosis) |     | 8                                                                              | 38                                                                                                                                                                                                                                                                                        |
| KPS                                           |     | 70                                                                             | 80                                                                                                                                                                                                                                                                                        |
| Mini Mental Status Exam Score                 |     |                                                                                |                                                                                                                                                                                                                                                                                           |
| History of seizures since last visit          |     | No                                                                             | No                                                                                                                                                                                                                                                                                        |

|                                               |  |                                                      |                                                                                                                                                                                                                                                                                                                                                                                                                                                                      |
|-----------------------------------------------|--|------------------------------------------------------|----------------------------------------------------------------------------------------------------------------------------------------------------------------------------------------------------------------------------------------------------------------------------------------------------------------------------------------------------------------------------------------------------------------------------------------------------------------------|
| Neurologic Deficit                            |  | Yes. Left facial droop.                              | No                                                                                                                                                                                                                                                                                                                                                                                                                                                                   |
| Symptoms Notes                                |  | MRI shows disease progression; hold avastin and TMZ. | She has done very well and other than continued problems with speech which is unchanged, she has had no new or progressive symptoms                                                                                                                                                                                                                                                                                                                                  |
| <b>Visit 16</b>                               |  |                                                      |                                                                                                                                                                                                                                                                                                                                                                                                                                                                      |
| Date of Visit (months from initial diagnosis) |  | 9                                                    | 40                                                                                                                                                                                                                                                                                                                                                                                                                                                                   |
| KPS                                           |  | 70                                                   | 80                                                                                                                                                                                                                                                                                                                                                                                                                                                                   |
| Mini Mental Status Exam Score                 |  |                                                      |                                                                                                                                                                                                                                                                                                                                                                                                                                                                      |
| History of seizures since last visit          |  | No                                                   | No                                                                                                                                                                                                                                                                                                                                                                                                                                                                   |
| Neurologic Deficit                            |  | Yes. Left facial droop.                              | No                                                                                                                                                                                                                                                                                                                                                                                                                                                                   |
| Symptoms Notes                                |  | Restart Avastin and TMZ.                             | She denies changes in weight or appetite. she denies fever, chills or signs of infection. HEENT: she denies changes in vision or hearing. NEURO: she denies headaches, seizures or confusion. Strength and balance are unchanged. RESP/CV: she denies cough, shortness of breath, chest pain or swelling of the arms/ legs. GI: she denies nausea, vomiting, diarrhea or constipation. HEM: she denies unusual bleed or bruising. INTEG: she denies rash or lesions. |
| <b>Visit 17</b>                               |  |                                                      |                                                                                                                                                                                                                                                                                                                                                                                                                                                                      |
| Date of Visit (months from initial diagnosis) |  | 11                                                   | 41                                                                                                                                                                                                                                                                                                                                                                                                                                                                   |
| KPS                                           |  | 50                                                   | 80                                                                                                                                                                                                                                                                                                                                                                                                                                                                   |

|                                               |  |                                                                                   |                                                                                                                                                                                                                                                                                                                                                    |
|-----------------------------------------------|--|-----------------------------------------------------------------------------------|----------------------------------------------------------------------------------------------------------------------------------------------------------------------------------------------------------------------------------------------------------------------------------------------------------------------------------------------------|
| Mini Mental Status Exam Score                 |  |                                                                                   |                                                                                                                                                                                                                                                                                                                                                    |
| History of seizures since last visit          |  | No                                                                                | No                                                                                                                                                                                                                                                                                                                                                 |
| Neurologic Deficit                            |  | Yes. Left facial droop.                                                           | No                                                                                                                                                                                                                                                                                                                                                 |
| Symptoms Notes                                |  | Difficulty dressing self, difficulty in vision increased, increased facial droop. | She reports significant fatigue and bone pain with the VP 16 which has improved since she stopped taking the medication. We had also started her on Ritalin which has helped her day time fatigue. She feels good now and has no concerns or complaints. She denies headaches and has had no seizures. She denies any new or progressive symptoms. |
| <b>Visit 18</b>                               |  |                                                                                   |                                                                                                                                                                                                                                                                                                                                                    |
| Date of Visit (months from initial diagnosis) |  |                                                                                   | 43                                                                                                                                                                                                                                                                                                                                                 |
| KPS                                           |  |                                                                                   | 80                                                                                                                                                                                                                                                                                                                                                 |
| Mini Mental Status Exam Score                 |  |                                                                                   |                                                                                                                                                                                                                                                                                                                                                    |
| History of seizures since last visit          |  |                                                                                   | No                                                                                                                                                                                                                                                                                                                                                 |
| Neurologic Deficit                            |  |                                                                                   | No                                                                                                                                                                                                                                                                                                                                                 |
| Symptoms Notes                                |  |                                                                                   | On examination, alert and oriented with clear and fluent speech.                                                                                                                                                                                                                                                                                   |
| <b>Visit 19</b>                               |  |                                                                                   |                                                                                                                                                                                                                                                                                                                                                    |
| Date of Visit (months from initial diagnosis) |  |                                                                                   | 44                                                                                                                                                                                                                                                                                                                                                 |
| KPS                                           |  |                                                                                   | 80                                                                                                                                                                                                                                                                                                                                                 |
| Mini Mental Status Exam Score                 |  |                                                                                   |                                                                                                                                                                                                                                                                                                                                                    |
| History of seizures since last visit          |  |                                                                                   | No                                                                                                                                                                                                                                                                                                                                                 |
| Neurologic Deficit                            |  |                                                                                   | No                                                                                                                                                                                                                                                                                                                                                 |

|                                               |  |  |                                                                                                                                                                                                                                                                                                       |
|-----------------------------------------------|--|--|-------------------------------------------------------------------------------------------------------------------------------------------------------------------------------------------------------------------------------------------------------------------------------------------------------|
| Symptoms Notes                                |  |  | She is doing well and has no new concerns or complaints. She is taking Ritalin once daily with improvement in speech and energy. She has occasional headaches. She reports intermittent bilateral wrist pain with certain activities. She has had no seizures and denies any new neurologic symptoms. |
| <b>Visit 20</b>                               |  |  |                                                                                                                                                                                                                                                                                                       |
| Date of Visit (months from initial diagnosis) |  |  | 46                                                                                                                                                                                                                                                                                                    |
| KPS                                           |  |  | 80                                                                                                                                                                                                                                                                                                    |
| Mini Mental Status Exam Score                 |  |  |                                                                                                                                                                                                                                                                                                       |
| History of seizures since last visit          |  |  | No                                                                                                                                                                                                                                                                                                    |
| Neurologic Deficit                            |  |  | No                                                                                                                                                                                                                                                                                                    |
| Symptoms Notes                                |  |  | Is here for a routine visit. She is currently receiving Avastin monotherapy for a progressing left temporal GBM. She is doing very well and tolerating Aatin without any problems. She denies headaches, seizures, CP, SOB, calf or leg pain and she has had no new neurologic symptoms.              |
| <b>Visit 21</b>                               |  |  |                                                                                                                                                                                                                                                                                                       |
| Date of Visit (months from initial diagnosis) |  |  | 46                                                                                                                                                                                                                                                                                                    |
| KPS                                           |  |  | 80                                                                                                                                                                                                                                                                                                    |
| Mini Mental Status Exam Score                 |  |  |                                                                                                                                                                                                                                                                                                       |
| History of seizures since last visit          |  |  | No                                                                                                                                                                                                                                                                                                    |

|                                               |  |  |                                                                                                                                                                                                                        |
|-----------------------------------------------|--|--|------------------------------------------------------------------------------------------------------------------------------------------------------------------------------------------------------------------------|
| Neurologic Deficit                            |  |  | No                                                                                                                                                                                                                     |
| Symptoms Notes                                |  |  | She is doing well and has no new concerns or complaints. She is taking Ritalin once daily with improvement in speech and energy. She denies headaches. She has had no seizures and denies any new neurologic symptoms. |
| <b>Visit 22</b>                               |  |  |                                                                                                                                                                                                                        |
| Date of Visit (months from initial diagnosis) |  |  | 48                                                                                                                                                                                                                     |
| KPS                                           |  |  | 80                                                                                                                                                                                                                     |
| Mini Mental Status Exam Score                 |  |  |                                                                                                                                                                                                                        |
| History of seizures since last visit          |  |  | No                                                                                                                                                                                                                     |
| Neurologic Deficit                            |  |  | No                                                                                                                                                                                                                     |
| Symptoms Notes                                |  |  | Doing well, no new problems, no sz. Meds: reviewed, no changes.<br>Exam: Alert, fluent in Espaniol (accd to daughter), no drift, gait ok. No new imaging today.                                                        |
| <b>Visit 23</b>                               |  |  |                                                                                                                                                                                                                        |
| Date of Visit (months from initial diagnosis) |  |  | 49                                                                                                                                                                                                                     |
| KPS                                           |  |  | 80                                                                                                                                                                                                                     |
| Mini Mental Status Exam Score                 |  |  |                                                                                                                                                                                                                        |
| History of seizures since last visit          |  |  | No                                                                                                                                                                                                                     |
| Neurologic Deficit                            |  |  | No                                                                                                                                                                                                                     |
| Symptoms Notes                                |  |  | Doing well on single agent Avastin. Continue q 2 wk infusions. RTC 4 weeks and MRI/visit in 8 weeks.                                                                                                                   |

|                                               |    |    |                                                                                                                                                                                                                                                                                                                           |
|-----------------------------------------------|----|----|---------------------------------------------------------------------------------------------------------------------------------------------------------------------------------------------------------------------------------------------------------------------------------------------------------------------------|
| <b>Visit 24</b>                               |    |    |                                                                                                                                                                                                                                                                                                                           |
| Date of Visit (months from initial diagnosis) |    |    | 51                                                                                                                                                                                                                                                                                                                        |
| KPS                                           |    |    | 80                                                                                                                                                                                                                                                                                                                        |
| Mini Mental Status Exam Score                 |    |    |                                                                                                                                                                                                                                                                                                                           |
| History of seizures since last visit          |    |    | No                                                                                                                                                                                                                                                                                                                        |
| Neurologic Deficit                            |    |    | No                                                                                                                                                                                                                                                                                                                        |
| Symptoms Notes                                |    |    | Status post resection of left temporal glioblastoma, as before. Faint enhancement anterior to the resection cavity and surrounding FLAIR hyperintensity are stable compared to the 2 months ago exam but slightly decreased in extent compared to the 5 months ago exam, consistent with response to therapy. New doctor. |
| <b>Visit 25</b>                               |    |    |                                                                                                                                                                                                                                                                                                                           |
| Date of Visit (months from initial diagnosis) |    |    | 53                                                                                                                                                                                                                                                                                                                        |
| KPS                                           |    |    | 70                                                                                                                                                                                                                                                                                                                        |
| Mini Mental Status Exam Score                 |    |    |                                                                                                                                                                                                                                                                                                                           |
| History of seizures since last visit          |    |    | No                                                                                                                                                                                                                                                                                                                        |
| Neurologic Deficit                            |    |    | No                                                                                                                                                                                                                                                                                                                        |
| Symptoms Notes                                |    |    | She is with a left temporal glioblastoma, currently on Avastin monotherapy since a half a year ago, who presents for interval follow-up MRI. She continues to have stable difficulty with word-finding. Denies new or progressive symptoms.                                                                               |
| <b>Clinical Trials</b>                        |    |    |                                                                                                                                                                                                                                                                                                                           |
| 1                                             | // | // | //                                                                                                                                                                                                                                                                                                                        |

| Patient ID                            | W26-1-1                   | W27-2-1                   | W28-1-1                           |
|---------------------------------------|---------------------------|---------------------------|-----------------------------------|
| <b>Patient Information</b>            |                           |                           |                                   |
| Gender                                | Female                    | Male                      | Male                              |
| Age at Initial Diagnosis              | 58                        | 65                        | 69                                |
| Weight                                | 48.6 kg                   | 88.5 kg                   | 71.5 kg                           |
| Height                                | 148 cm                    | 186 cm                    | 172 cm                            |
| KPS                                   | 100 (?)                   | 90 (?)                    | 100 (?)                           |
| Mini Mental Status Exam Score         | 30                        | 30                        | 30                                |
| History of Seizures Since Last Visit  | Yes                       | Yes                       | No                                |
| Neurologic Deficit                    | No                        | No                        | Yes. Left homonymous hemianopsia. |
| Presentation Symptoms                 | Seizure                   | Seizures.                 | Headache.                         |
| Time to Progression                   | 1005 days                 | 26 days                   | NA                                |
| Overall Survival                      | 1293 days                 | 72 days                   | 300 days                          |
| Time to Last Follow-up                | NA                        | NA                        | NA                                |
| Cause Of Death                        | Tumor progression         | Tumor progression         | Tumor progression                 |
| <b>Tumor Information</b>              |                           |                           |                                   |
| <b>Tumor 1</b>                        |                           |                           |                                   |
| Date (months from initial diagnosis)  | 0                         | 0                         | 0                                 |
| Diagnosis                             | Astrocytic tumor          | Astrocytic tumor          | Astrocytic tumor                  |
| Grade                                 | Glioblastoma WHO grade IV | Glioblastoma WHO grade IV | Glioblastoma WHO grade IV         |
| Location                              | Right parietal-temporal   | Right Occipital-Temporal  | Right Occipital-Parietal          |
| <b>Medications</b>                    |                           |                           |                                   |
| <b>Medication 1</b>                   |                           |                           |                                   |
| Category                              | Anti-epileptic            | Anti-epileptic            | //                                |
| Drug Name                             | Phenytoin                 | Kepra                     |                                   |
| Start (months from initial diagnosis) | 0                         | -22                       |                                   |
| Total Daily Dosage                    | 200mg PO q12hr            | 500mg BID                 |                                   |
| End (months from initial diagnosis)   | 0                         | //                        |                                   |
| <b>Medication 2</b>                   |                           |                           |                                   |
| Category                              | Steroids                  | Steroids                  |                                   |
| Drug Name                             | Dexamethasone             | Dexamethasone             |                                   |
| Start (months from initial diagnosis) | 0                         | -1                        |                                   |
| Total Daily Dosage                    | 4mg PO q 6hr              | 10mg IV                   |                                   |



|                                       |                   |               |  |
|---------------------------------------|-------------------|---------------|--|
| End (months from initial diagnosis)   | 0                 | -1            |  |
| <b>Medication 3</b>                   |                   |               |  |
| Category                              | Steroids          | Steroids      |  |
| Drug Name                             | Dexamethasone     | Dexamethasone |  |
| Start (months from initial diagnosis) | 0                 | -1            |  |
| Total Daily Dosage                    | 10mg IV           | 6mg IV BID    |  |
| End (months from initial diagnosis)   | 0                 | -1            |  |
| <b>Medication 4</b>                   |                   |               |  |
| Category                              | Steroids          | Steroids      |  |
| Drug Name                             | Dexamethasone     | Dexamethasone |  |
| Start (months from initial diagnosis) | 0                 | -1            |  |
| Total Daily Dosage                    | 4mg IV            | 2mg IV QD     |  |
| End (months from initial diagnosis)   | 0                 | -1            |  |
| <b>Medication 5</b>                   |                   |               |  |
| Category                              | Anti-epileptic    | Steroids      |  |
| Drug Name                             | KEPPRA            | Dexamethasone |  |
| Start (months from initial diagnosis) | 32                | -1            |  |
| Total Daily Dosage                    | 500mg 2x/d oral   | 6mg IV        |  |
| End (months from initial diagnosis)   | 34                | -1            |  |
| <b>Medication 6</b>                   |                   |               |  |
| Category                              | Anti-hypertensive | Steroids      |  |
| Drug Name                             | Lisinopril        | Dexamethasone |  |
| Start (months from initial diagnosis) | 33                | -1            |  |
| Total Daily Dosage                    | 20mg daily oral   | 2mg PO BID    |  |
| End (months from initial diagnosis)   | 33                | //            |  |
| <b>Medication 7</b>                   |                   |               |  |
| Category                              | Anti-epileptic    |               |  |
| Drug Name                             | KEPPRA            |               |  |
| Start (months from initial diagnosis) | 34                |               |  |
| Total Daily Dosage                    | 250mg 3x/d oral   |               |  |
| End (months from initial diagnosis)   | 39                |               |  |
| <b>Medication 8</b>                   |                   |               |  |
| Category                              | Steroids          |               |  |
| Drug Name                             | Dexamethasone     |               |  |
| Start (months from initial diagnosis) | 39                |               |  |

|                                                 |                                                    |                           |                           |
|-------------------------------------------------|----------------------------------------------------|---------------------------|---------------------------|
| Total Daily Dosage                              | 4mg daily oral                                     |                           |                           |
| End (months from initial diagnosis)             | 40                                                 |                           |                           |
| <b>Surgery</b>                                  |                                                    |                           |                           |
| <b>Surgery 1</b>                                |                                                    |                           |                           |
| Date of Surgery (months from initial diagnosis) | 0                                                  | 0                         | 0                         |
| Gliadel                                         | No                                                 | No                        | No                        |
| Awake mapping                                   | Yes                                                | No                        | No                        |
| Stealth scan                                    | Yes                                                | Yes                       | Yes                       |
| <b>Tissue Diagnosis</b>                         |                                                    |                           |                           |
| <b>Tissue 1</b>                                 |                                                    |                           |                           |
| Serial Number                                   | W26-1-1, SN228                                     | W27-2-1, SN233            | W28-1-1, SN234            |
| Diagnosis                                       | Glioblastoma WHO grade IV                          | Glioblastoma WHO grade IV | Glioblastoma WHO grade IV |
| Location                                        | Right Parietal-Temporal                            | Right Occipital-Temporal  | Right Occipital-Parietal  |
| Extent                                          | Complete resection                                 | Complete resection        | Subtotal resection 90%    |
| MRI confirmation                                | Yes                                                | Yes                       | Yes                       |
| <b>Chemotherapy</b>                             |                                                    |                           |                           |
| <b>Medication 1</b>                             |                                                    |                           |                           |
| Drug Name                                       | Temozolomide                                       | Temozolomide              | //                        |
| Start (months from initial diagnosis)           | 33                                                 | -21                       |                           |
| Dosage                                          | 65mg                                               | 75mg/m2                   |                           |
| End (months from initial diagnosis)             | 37                                                 | -20                       |                           |
| Description                                     | daily oral                                         | Concurrent                |                           |
| <b>Medication 2</b>                             |                                                    |                           |                           |
| Drug Name                                       | Avastin                                            | Temozolomide              |                           |
| Start (months from initial diagnosis)           | 38                                                 | -19                       |                           |
| Dosage                                          | 411-390mg in NS<br>(0.9%NaCl) IV solution<br>100mg | 100mg/m2                  |                           |
| End (months from initial diagnosis)             | 39                                                 | -19                       |                           |
| Description                                     | once every 2 weeks                                 | maintenance               |                           |
| <b>Radiation Therapy</b>                        |                                                    |                           |                           |
| <b>Medication 1</b>                             |                                                    |                           |                           |

|                                                   |                        |                           |                           |
|---------------------------------------------------|------------------------|---------------------------|---------------------------|
| Type                                              | //                     | IMRT                      | //                        |
| Start (months from initial diagnosis)             |                        | -21                       |                           |
| Dosage                                            |                        | 4600cGy                   |                           |
| End (months from initial diagnosis)               |                        | -20                       |                           |
| Description                                       |                        | Concurrent                |                           |
| Fraction                                          |                        | 6                         |                           |
| <b>Medication 2</b>                               |                        |                           |                           |
| Type                                              |                        | IMRT                      |                           |
| Start (months from initial diagnosis)             |                        | -20                       |                           |
| Dosage                                            |                        | 1400cGy                   |                           |
| End (months from initial diagnosis)               |                        | -20                       |                           |
| Description                                       |                        | Boost                     |                           |
| Fraction                                          |                        | 7                         |                           |
| <b>Pathology</b>                                  |                        |                           |                           |
| <b>Surgery 1</b>                                  |                        |                           |                           |
| Date Of Report<br>(months from initial diagnosis) | 0                      | //                        | //                        |
| <b>Report</b>                                     |                        |                           |                           |
| Location                                          | Tissue: W26-1-1, SN228 | Tissue: W27-2-1, SN233    | Tissue: W28-1-1, SN234    |
| Histopathology                                    | Glioblastoma           | Glioblastoma WHO grade IV | Glioblastoma WHO grade IV |
| 1p19q_deletion                                    |                        |                           |                           |
| EGFR                                              |                        |                           |                           |
| PTEN                                              |                        |                           |                           |
| MGMT PCR                                          |                        |                           |                           |
| MGMT IHC                                          |                        |                           |                           |
| MGMT MS-MLPA:R1                                   | methyated (0.45)       | unmethyated (0.24)        | methyated (0.53)          |
| MGMT MS-MLPA:R2                                   | methyated (0.40)       | unmethyated (0.06)        | unmethyated (0.09)        |
| MGMT MS-MLPA:R3                                   | methyated (0.30)       | unmethyated (0.07)        | unmethyated (0.08)        |
| IDH1 mutation                                     | wildtype               | wildtype                  | wildtype                  |
| EGFR vIII                                         |                        | not detected              | not detected              |
| <b>Follow-up Clinic Visit</b>                     |                        |                           |                           |
| <b>Visit 1</b>                                    |                        |                           |                           |
| Date of Visit (months from initial diagnosis)     | 32                     | 1                         | 0                         |

|                                               |                                                                                                                                                                                                                                                                                                                                                                                                                                                                 |                                                                                                      |    |
|-----------------------------------------------|-----------------------------------------------------------------------------------------------------------------------------------------------------------------------------------------------------------------------------------------------------------------------------------------------------------------------------------------------------------------------------------------------------------------------------------------------------------------|------------------------------------------------------------------------------------------------------|----|
| KPS                                           | 60                                                                                                                                                                                                                                                                                                                                                                                                                                                              | 90                                                                                                   | 80 |
| Mini Mental Status Exam Score                 |                                                                                                                                                                                                                                                                                                                                                                                                                                                                 |                                                                                                      |    |
| History of seizures since last visit          | No                                                                                                                                                                                                                                                                                                                                                                                                                                                              | Yes                                                                                                  | No |
| Neurologic Deficit                            | No                                                                                                                                                                                                                                                                                                                                                                                                                                                              | Yes. Left neglect.                                                                                   | No |
| Symptoms Notes                                | I discussed with her the possible options at this point. I told her that surgical resection is probably not going to give her any clear likelihood of improved survival. If we do surgery I would want functional MRI and I would like to do the surgery with brain mapping. She is going to be seen by Dr. Bankers today and these options will be further discussed and we can make recommendations as to whether or not she should proceed with the surgery. | Moderate to severe headaches despite increasing pain medication.                                     | // |
| <b>Visit 2</b>                                |                                                                                                                                                                                                                                                                                                                                                                                                                                                                 |                                                                                                      |    |
| Date of Visit (months from initial diagnosis) | 32                                                                                                                                                                                                                                                                                                                                                                                                                                                              | 1                                                                                                    |    |
| KPS                                           | 60                                                                                                                                                                                                                                                                                                                                                                                                                                                              | 70                                                                                                   |    |
| Mini Mental Status Exam Score                 |                                                                                                                                                                                                                                                                                                                                                                                                                                                                 |                                                                                                      |    |
| History of seizures since last visit          | Yes                                                                                                                                                                                                                                                                                                                                                                                                                                                             | No                                                                                                   |    |
| Neurologic Deficit                            | No                                                                                                                                                                                                                                                                                                                                                                                                                                                              | Yes. Left neglect.                                                                                   |    |
| Symptoms Notes                                | Denies any new or progressive symptoms.                                                                                                                                                                                                                                                                                                                                                                                                                         | Hospitalization for severe headaches, draining wound, and concern about infection at operative site. |    |
| <b>Visit 3</b>                                |                                                                                                                                                                                                                                                                                                                                                                                                                                                                 |                                                                                                      |    |
| Date of Visit (months from initial diagnosis) | 33                                                                                                                                                                                                                                                                                                                                                                                                                                                              | 1                                                                                                    |    |
| KPS                                           | 60                                                                                                                                                                                                                                                                                                                                                                                                                                                              | 60                                                                                                   |    |
| Mini Mental Status Exam Score                 |                                                                                                                                                                                                                                                                                                                                                                                                                                                                 |                                                                                                      |    |

|                                               |                                         |                                                |  |
|-----------------------------------------------|-----------------------------------------|------------------------------------------------|--|
| History of seizures since last visit          | Yes                                     | No                                             |  |
| Neurologic Deficit                            | No                                      | Yes. Left neglect.                             |  |
| Symptoms Notes                                | Denies any new or progressive symptoms. | Increase in episodic escalations of headaches. |  |
| <b>Visit 4</b>                                |                                         |                                                |  |
| Date of Visit (months from initial diagnosis) | 34                                      |                                                |  |
| KPS                                           | 60                                      |                                                |  |
| Mini Mental Status Exam Score                 |                                         |                                                |  |
| History of seizures since last visit          | No                                      |                                                |  |
| Neurologic Deficit                            | No                                      |                                                |  |
| Symptoms Notes                                | Denies any new or progressive simptoms. |                                                |  |
| <b>Visit 5</b>                                |                                         |                                                |  |
| Date of Visit (months from initial diagnosis) | 35                                      |                                                |  |
| KPS                                           | 60                                      |                                                |  |
| Mini Mental Status Exam Score                 |                                         |                                                |  |
| History of seizures since last visit          | Yes                                     |                                                |  |
| Neurologic Deficit                            | Yes. Left-sided weakness.               |                                                |  |
| Symptoms Notes                                | Denies any new or progressive symptoms. |                                                |  |
| <b>Visit 6</b>                                |                                         |                                                |  |
| Date of Visit (months from initial diagnosis) | 37                                      |                                                |  |
| KPS                                           | 60                                      |                                                |  |
| Mini Mental Status Exam Score                 |                                         |                                                |  |
| History of seizures since last visit          | No                                      |                                                |  |
| Neurologic Deficit                            | No                                      |                                                |  |

|                                               |                                                                                                                                                                                                                |  |  |
|-----------------------------------------------|----------------------------------------------------------------------------------------------------------------------------------------------------------------------------------------------------------------|--|--|
| Symptoms Notes                                | She has continued cooking and working around the house, however over the past month, has noted increasing fatigue, and some cognitive decline as well as new falls with some increased difficulty in mobility. |  |  |
| <b>Visit 7</b>                                |                                                                                                                                                                                                                |  |  |
| Date of Visit (months from initial diagnosis) | 38                                                                                                                                                                                                             |  |  |
| KPS                                           | 50                                                                                                                                                                                                             |  |  |
| Mini Mental Status Exam Score                 |                                                                                                                                                                                                                |  |  |
| History of seizures since last visit          | No                                                                                                                                                                                                             |  |  |
| Neurologic Deficit                            | No                                                                                                                                                                                                             |  |  |
| Symptoms Notes                                | Over the past month, she has continued to decline markedly at home and is no longer able to tend to daily activities. She is now more reliant on the wheelchair.                                               |  |  |
| <b>Visit 8</b>                                |                                                                                                                                                                                                                |  |  |
| Date of Visit (months from initial diagnosis) | 39                                                                                                                                                                                                             |  |  |
| KPS                                           | 50                                                                                                                                                                                                             |  |  |
| Mini Mental Status Exam Score                 |                                                                                                                                                                                                                |  |  |
| History of seizures since last visit          | No                                                                                                                                                                                                             |  |  |
| Neurologic Deficit                            | No                                                                                                                                                                                                             |  |  |

|                                               |                                                                                                                                                                                                                                                                                                                              |    |    |
|-----------------------------------------------|------------------------------------------------------------------------------------------------------------------------------------------------------------------------------------------------------------------------------------------------------------------------------------------------------------------------------|----|----|
| Symptoms Notes                                | Over the past few weeks, she has become more fatigued with progressive left-sided weakness and neglect. She is now more dependent on the wheelchair. She denies any further seizures. She has decided to move forward with radiation with continuation of Avastin and consideration of Hospice should her symptoms progress. |    |    |
| <b>Visit 9</b>                                |                                                                                                                                                                                                                                                                                                                              |    |    |
| Date of Visit (months from initial diagnosis) | 40                                                                                                                                                                                                                                                                                                                           |    |    |
| KPS                                           |                                                                                                                                                                                                                                                                                                                              |    |    |
| Mini Mental Status Exam Score                 |                                                                                                                                                                                                                                                                                                                              |    |    |
| History of seizures since last visit          | No                                                                                                                                                                                                                                                                                                                           |    |    |
| Neurologic Deficit                            | No                                                                                                                                                                                                                                                                                                                           |    |    |
| Symptoms Notes                                | //                                                                                                                                                                                                                                                                                                                           |    |    |
| <b>Clinical Trials</b>                        |                                                                                                                                                                                                                                                                                                                              |    |    |
| 1                                             | //                                                                                                                                                                                                                                                                                                                           | // | // |

| Patient ID                           | W29-1-1    | W31-1-1 | W32-1-1 |
|--------------------------------------|------------|---------|---------|
| <b>Patient Information</b>           |            |         |         |
| Gender                               | Male       | Male    | Male    |
| Age at Initial Diagnosis             | 74         | 18      | 57      |
| Weight                               | 89.54 kg   | 179 cm  | 91.3 kg |
| Height                               | 179 cm     | 76.7 kg | 183 cm  |
| KPS                                  | 100 (?)    | 90 (?)  | 90 (?)  |
| Mini Mental Status Exam Score        | n/d        | 27      | 30      |
| History of Seizures Since Last Visit | No         | Yes     | Yes     |
| Neurologic Deficit                   | Yes. Left. | No      | No      |

|                                       |                                                                                                   |                                                                                                |                                                         |
|---------------------------------------|---------------------------------------------------------------------------------------------------|------------------------------------------------------------------------------------------------|---------------------------------------------------------|
| Presentation Symptoms                 | Decreased balance, occasional tingling in the tips of digits on left hand, dragging of left foot. | History of multiple seizures and migraine headaches which had been going on for about 2 weeks. | Headaches for 1 month and worsening confusion. Has DVT. |
| Time to Progression                   | 246 days                                                                                          | 312 days                                                                                       | NA                                                      |
| Overall Survival                      | 260 days                                                                                          | 871 days                                                                                       | NA                                                      |
| Time to Last Follow-up                | NA                                                                                                | NA                                                                                             | 1484 days                                               |
| Cause Of Death                        | Tumor progression                                                                                 | Tumor progression                                                                              | //                                                      |
| <b>Tumor Information</b>              |                                                                                                   |                                                                                                |                                                         |
| <b>Tumor 1</b>                        |                                                                                                   |                                                                                                |                                                         |
| Date (months from initial diagnosis)  | 0                                                                                                 | 0                                                                                              | 0                                                       |
| Diagnosis                             | Astrocytic tumor                                                                                  | Astrocytic tumor                                                                               | Astrocytic tumor                                        |
| Grade                                 | Glioblastoma WHO grade IV                                                                         | Glioblastoma WHO grade IV                                                                      | Glioblastoma WHO grade IV                               |
| Location                              | Right Parietal                                                                                    | Left Frontal                                                                                   | Right Frontal                                           |
| <b>Medications</b>                    |                                                                                                   |                                                                                                |                                                         |
| <b>Medication 1</b>                   |                                                                                                   |                                                                                                |                                                         |
| Category                              | Steroids                                                                                          | Anti-epileptic                                                                                 | Anti-epileptic                                          |
| Drug Name                             | Dexamethasone                                                                                     | Phenytoin                                                                                      | KEPPRA                                                  |
| Start (months from initial diagnosis) | 0                                                                                                 | -1                                                                                             | 0                                                       |
| Total Daily Dosage                    | 4mg QID decrease to 1mg QD                                                                        | 1000mg in NS(0.9% NaCl) IV solution 50mg once a day                                            | 750 mg twice a day oral                                 |
| End (months from initial diagnosis)   | 8                                                                                                 | 0                                                                                              | 0                                                       |
| <b>Medication 2</b>                   |                                                                                                   |                                                                                                |                                                         |
| Category                              | Anti-epileptic                                                                                    | Steroids                                                                                       | Anti-epileptic                                          |
| Drug Name                             | KEPPRA                                                                                            | Dexamethasone                                                                                  | Fosphenytoin (CEREBYX)                                  |
| Start (months from initial diagnosis) | 0                                                                                                 | 0                                                                                              | 0                                                       |
| Total Daily Dosage                    | 1000mg in NS(0.9% NaCl) IV solution 100ml                                                         | 4mg QID taper to 1mg QD                                                                        | 1000 mg in NS(0.9% NaCl) IV solution 100 mg once        |
| End (months from initial diagnosis)   | 0                                                                                                 | 0                                                                                              |                                                         |
| <b>Medication 3</b>                   |                                                                                                   |                                                                                                |                                                         |
| Category                              | Anti-epileptic                                                                                    | Anti-epileptic                                                                                 | Steroids                                                |
| Drug Name                             | KEPPRA                                                                                            | KEPPRA                                                                                         | Dexamethasone                                           |
| Start (months from initial diagnosis) | 0                                                                                                 | 0                                                                                              | 0                                                       |



|                                       |                       |                                                    |                                                                                                               |
|---------------------------------------|-----------------------|----------------------------------------------------|---------------------------------------------------------------------------------------------------------------|
| Total Daily Dosage                    | 500mgx2caps 2x/d oral | 1000mg BID decrease to 750mg BID                   | 4mg/1mL injection 4mg 4 times a day, 3mg 4 times a day, 2mg 4 times a day, 2mg 3 times a day, 2mg twice a day |
| End (months from initial diagnosis)   | 2                     | 1                                                  | 0                                                                                                             |
| <b>Medication 4</b>                   |                       |                                                    |                                                                                                               |
| Category                              | Anti-epileptic        | Anti-epileptic                                     | Anti-epileptic                                                                                                |
| Drug Name                             | KEPPRA                | Phenytoin                                          | KEPPRA                                                                                                        |
| Start (months from initial diagnosis) | 2                     | 1                                                  | 0                                                                                                             |
| Total Daily Dosage                    | 500mg oral daily      | 300mg QD                                           | 1000 mg in NS(0.9% NaCl) IV solution 100 mg twice a day                                                       |
| End (months from initial diagnosis)   | 3                     | 3                                                  | 0                                                                                                             |
| <b>Medication 5</b>                   |                       |                                                    |                                                                                                               |
| Category                              | Multi-vitamin         | Multi-vitamin                                      | Anti-epileptic                                                                                                |
| Drug Name                             |                       | //                                                 | KEPPRA                                                                                                        |
| Start (months from initial diagnosis) | 4                     | 1                                                  | 0                                                                                                             |
| Total Daily Dosage                    | 1 cap daily oral      | 1 cap daily oral                                   | 1000 mg twice a day oral                                                                                      |
| End (months from initial diagnosis)   | 5                     | 8                                                  | 0                                                                                                             |
| <b>Medication 6</b>                   |                       |                                                    |                                                                                                               |
| Category                              |                       | Anti-epileptic                                     | Steroids                                                                                                      |
| Drug Name                             |                       | Fosphenytoin (CEREBYX)                             | Dexamethasone                                                                                                 |
| Start (months from initial diagnosis) |                       | 16                                                 | 0                                                                                                             |
| Total Daily Dosage                    |                       | 100mg PE injection 3x/d                            | 1 mg twice a day, 1mg daily oral                                                                              |
| End (months from initial diagnosis)   |                       | 16                                                 | 0                                                                                                             |
| <b>Medication 7</b>                   |                       |                                                    |                                                                                                               |
| Category                              |                       | Steroids                                           | Anti-epileptic                                                                                                |
| Drug Name                             |                       | Dexamethasone                                      | KEPPRA                                                                                                        |
| Start (months from initial diagnosis) |                       | 16                                                 | 0                                                                                                             |
| Total Daily Dosage                    |                       | 4mg/1mL injection 4mg 4 times a day, 3 times a day | 1500 mg twice a day oral                                                                                      |
| End (months from initial diagnosis)   |                       | 16                                                 | 11                                                                                                            |
| <b>Medication 8</b>                   |                       |                                                    |                                                                                                               |
| Category                              |                       | Anti-epileptic                                     | Anti-epileptic                                                                                                |
| Drug Name                             |                       | Phenytoin                                          | KEPPRA XR                                                                                                     |

|                                       |  |                                                                                                                                      |                                                      |
|---------------------------------------|--|--------------------------------------------------------------------------------------------------------------------------------------|------------------------------------------------------|
| Start (months from initial diagnosis) |  | 16                                                                                                                                   | 11                                                   |
| Total Daily Dosage                    |  | 300 mg at bedtime oral                                                                                                               | 1500 mg every morning and 1000 mg every evening oral |
| End (months from initial diagnosis)   |  | 16                                                                                                                                   | 14                                                   |
| <b>Medication 9</b>                   |  |                                                                                                                                      |                                                      |
| Category                              |  | Steroids                                                                                                                             | Anti-epileptic                                       |
| Drug Name                             |  | Dexamethasone                                                                                                                        | KEPPRA XR                                            |
| Start (months from initial diagnosis) |  | 16                                                                                                                                   | 14                                                   |
| Total Daily Dosage                    |  | 4 mg 4 times a day, 4mg 3times a day, 3mg 3 times a day, 2mg twice a day oral, 3mg 3 times a day, 2mg 3 times a day, 2mg twice a day | 1000 mg twice a day oral                             |
| End (months from initial diagnosis)   |  | 16                                                                                                                                   | 27                                                   |
| <b>Medication 10</b>                  |  |                                                                                                                                      |                                                      |
| Category                              |  | Anti-epileptic                                                                                                                       | Anti-epileptic                                       |
| Drug Name                             |  | KEPPRA                                                                                                                               | KEPPRA XR                                            |
| Start (months from initial diagnosis) |  | 21                                                                                                                                   | 39                                                   |
| Total Daily Dosage                    |  | 500 mg twice a day oral                                                                                                              | 1000 mg twice a day oral                             |
| End (months from initial diagnosis)   |  | 21                                                                                                                                   | 42                                                   |
| <b>Medication 11</b>                  |  |                                                                                                                                      |                                                      |
| Category                              |  | Anti-epileptic                                                                                                                       |                                                      |
| Drug Name                             |  | KEPPRA                                                                                                                               |                                                      |
| Start (months from initial diagnosis) |  | 21                                                                                                                                   |                                                      |
| Total Daily Dosage                    |  | 1000 mg twice a day oral                                                                                                             |                                                      |
| End (months from initial diagnosis)   |  | 22                                                                                                                                   |                                                      |
| <b>Medication 12</b>                  |  |                                                                                                                                      |                                                      |
| Category                              |  | Anti-epileptic                                                                                                                       |                                                      |
| Drug Name                             |  | KEPPRA XR                                                                                                                            |                                                      |
| Start (months from initial diagnosis) |  | 23                                                                                                                                   |                                                      |
| Total Daily Dosage                    |  | 1000 mg twice a day oral                                                                                                             |                                                      |
| End (months from initial diagnosis)   |  | 27                                                                                                                                   |                                                      |
| <b>Medication 13</b>                  |  |                                                                                                                                      |                                                      |
| Category                              |  | Steroids                                                                                                                             |                                                      |
| Drug Name                             |  | Dexamethasone                                                                                                                        |                                                      |

|                                                 |                           |                                 |                           |
|-------------------------------------------------|---------------------------|---------------------------------|---------------------------|
| Start (months from initial diagnosis)           |                           | 26                              |                           |
| Total Daily Dosage                              |                           | 4mg/1mL injection 4mg 4<br>once |                           |
| End (months from initial diagnosis)             |                           | //                              |                           |
| <b>Medication 14</b>                            |                           |                                 |                           |
| Category                                        |                           | Steroids                        |                           |
| Drug Name                                       |                           | Dexamethasone                   |                           |
| Start (months from initial diagnosis)           |                           | 27                              |                           |
| Total Daily Dosage                              |                           | 4mg/1mL injection 10mg          |                           |
| End (months from initial diagnosis)             |                           | //                              |                           |
| <b>Surgery</b>                                  |                           |                                 |                           |
| <b>Surgery 1</b>                                |                           |                                 |                           |
| Date of Surgery (months from initial diagnosis) | 0                         | 0                               | 0                         |
| Gliadel                                         | No                        | No                              | No                        |
| Awake mapping                                   | No                        | No                              | No                        |
| Stealth scan                                    | Yes                       | Yes                             | Yes                       |
| <b>Surgery 2</b>                                |                           |                                 |                           |
| Date of Surgery (months from initial diagnosis) |                           | 16                              |                           |
| Gliadel                                         |                           | No                              |                           |
| Awake mapping                                   |                           | Yes                             |                           |
| Stealth scan                                    |                           | Yes                             |                           |
| <b>Tissue Diagnosis</b>                         |                           |                                 |                           |
| <b>Tissue 1</b>                                 |                           |                                 |                           |
| Serial Number                                   | W29-1-1, SN235            | W31-1-1, SN242                  | W32-1-1, SN243            |
| Diagnosis                                       | Glioblastoma WHO grade IV | Glioblastoma WHO grade IV       | Glioblastoma WHO grade IV |
| Location                                        | Right Parietal            | Left Frontal                    | Right Frontal             |
| Extent                                          | Complete resection        | Complete resection              | Complete resection        |
| MRI confirmation                                | Yes                       | Yes                             | Yes                       |
| Notes                                           |                           | //                              | //                        |
| <b>Chemotherapy</b>                             |                           |                                 |                           |
| <b>Medication 1</b>                             |                           |                                 |                           |
| Drug Name                                       | Temozolomide              | Temozolomide                    | Temozolomide              |

|                                       |                    |                                                        |                     |
|---------------------------------------|--------------------|--------------------------------------------------------|---------------------|
| Start (months from initial diagnosis) | 0                  | 0                                                      | 0                   |
| Dosage                                | 140mg              | 140mg                                                  | 160mg               |
| End (months from initial diagnosis)   | 2                  | 3                                                      | 2                   |
| Description                           | concurrent         | daily oral                                             | concurrent          |
| <b>Medication 2</b>                   |                    |                                                        |                     |
| Drug Name                             | Temozolomide       | Temozolomide                                           | Temozolomide        |
| Start (months from initial diagnosis) | 3                  | 4                                                      | 2                   |
| Dosage                                | 400mg              | 400mg                                                  | 400mg               |
| End (months from initial diagnosis)   | 4                  | 11                                                     | 11                  |
| Description                           | maintenance 5x/mo  | every 4 weeks for 5d oral                              | maintenance 5x/mo.  |
| <b>Medication 3</b>                   |                    |                                                        |                     |
| Drug Name                             | Temozolomide       | Temozolomide                                           | Temozolomide        |
| Start (months from initial diagnosis) | 5                  | 11                                                     | 11                  |
| Dosage                                | 150mg              | 150mg                                                  | 160mg               |
| End (months from initial diagnosis)   | 8                  | 16                                                     | 13                  |
| Description                           | maintenance 21x/mo | daily oral                                             | maintenance 21x/mo. |
| <b>Medication 4</b>                   |                    |                                                        |                     |
| Drug Name                             |                    | Lomustine                                              | Temozolomide        |
| Start (months from initial diagnosis) |                    | 16                                                     | 13                  |
| Dosage                                |                    | 220mg                                                  | 400mg               |
| End (months from initial diagnosis)   |                    | 21                                                     | 15                  |
| Description                           |                    | maintenance 1x/6wks                                    | maintenance 5x/mo.  |
| <b>Medication 5</b>                   |                    |                                                        |                     |
| Drug Name                             |                    | Avastin                                                |                     |
| Start (months from initial diagnosis) |                    | 17                                                     |                     |
| Dosage                                |                    | 820 mg in NS(0.9% NaCl) IV solution 100 mg twice a day |                     |
| End (months from initial diagnosis)   |                    | 27                                                     |                     |
| Description                           |                    | maintenance 1x/2wks                                    |                     |
| <b>Radiation Therapy</b>              |                    |                                                        |                     |
| <b>Medication 1</b>                   |                    |                                                        |                     |
| Type                                  | IMRT               | IMRT                                                   | IMRT                |

|                                                   |                        |                            |                            |
|---------------------------------------------------|------------------------|----------------------------|----------------------------|
| Start (months from initial diagnosis)             | 0                      | 0                          | 0                          |
| Dosage                                            | 4500cGy                | 4500cGy                    | 4140cGy                    |
| End (months from initial diagnosis)               | 2                      | 1                          | 1                          |
| Description                                       | Concurrent             | Concurrent                 | Concurrent                 |
| Fraction                                          | 25                     | 25                         | 23                         |
| <b>Medication 2</b>                               |                        |                            |                            |
| Type                                              | IMRT                   | IMRT                       | IMRT                       |
| Start (months from initial diagnosis)             | 2                      | 1                          | 1                          |
| Dosage                                            | 1800cGy                | 1440cGy                    | 1800cGy                    |
| End (months from initial diagnosis)               | 2                      | 2                          | 2                          |
| Description                                       | Boost                  | Boost                      | Boost                      |
| Fraction                                          | 10                     | 8                          | 10                         |
| <b>Medication 3</b>                               |                        |                            |                            |
| Type                                              | Stereotactic           | Stereotactic               |                            |
| Start (months from initial diagnosis)             | 5                      | 10                         |                            |
| Dosage                                            | 20Gy                   | 1800cGy                    |                            |
| End (months from initial diagnosis)               | 5                      |                            |                            |
| Description                                       | Gamma Knife            | Cyberknife                 |                            |
| Fraction                                          | 1                      | 1                          |                            |
| <b>Pathology</b>                                  |                        |                            |                            |
| <b>Surgery 1</b>                                  |                        |                            |                            |
| Date Of Report<br>(months from initial diagnosis) | 0                      | 0                          | 0                          |
| <b>Report</b>                                     |                        |                            |                            |
| Location                                          | Tissue: W29-1-1, SN235 | Tissue: W31-1-1, SN242     | Tissue: W32-1-1, SN243     |
| Histopathology                                    | Glioblastoma           | Glioblastoma, WHO grade IV | Glioblastoma, WHO grade IV |
| 1p19q_deletion                                    | Negative               | Positive                   | Negative                   |
| EGFR                                              | amplification          | gain                       | gain                       |
| PTEN                                              | deletion               | deletion                   | gain                       |
| MGMT PCR                                          | unmethylated           | unmethylated               | methylated                 |
| MGMT IHC                                          | 10%-15%                | 75%                        | negative                   |
| MGMT MS-MLPA:R1                                   | methylated (0.41)      | unmethylated (0.22)        | methylated (0.85)          |
| MGMT MS-MLPA:R2                                   | unmethylated (0.06)    | unmethylated (0.05)        | unmethylated (0.00)        |

|                                               |                                                                            |                                                             |                                                                                  |
|-----------------------------------------------|----------------------------------------------------------------------------|-------------------------------------------------------------|----------------------------------------------------------------------------------|
| MGMT MS-MLPA:R3                               | unmethylated (0.05)                                                        | unmethylated (0.03)                                         | methylated (1.02)                                                                |
| IDH1 mutation                                 | wildtype                                                                   | R132H                                                       | wildtype                                                                         |
| EGFR vIII                                     | detected                                                                   | not detected                                                | not detected                                                                     |
| <b>Follow-up Clinic Visit</b>                 |                                                                            |                                                             |                                                                                  |
| <b>Visit 1</b>                                |                                                                            |                                                             |                                                                                  |
| Date of Visit (months from initial diagnosis) | 0                                                                          | 0                                                           | 0                                                                                |
| KPS                                           | 90                                                                         |                                                             |                                                                                  |
| Mini Mental Status Exam Score                 |                                                                            | 27                                                          | 30                                                                               |
| History of seizures since last visit          | No                                                                         | No                                                          | No                                                                               |
| Neurologic Deficit                            | Yes. Left leg weakness.                                                    | No                                                          | No                                                                               |
| Symptoms Notes                                | Left leg weakness, balance problems. Suture removal.                       | Mild difficulty with short-term memory. Post-operative MRI. | Taking hot shower when two generalized seizures occurred, taken to ER. ER visit. |
| <b>Visit 2</b>                                |                                                                            |                                                             |                                                                                  |
| Date of Visit (months from initial diagnosis) | 2                                                                          | 0                                                           | 0                                                                                |
| KPS                                           | 80                                                                         | 90                                                          | 100                                                                              |
| Mini Mental Status Exam Score                 |                                                                            |                                                             |                                                                                  |
| History of seizures since last visit          | No                                                                         | No                                                          | No                                                                               |
| Neurologic Deficit                            | Yes. Left leg weakness.                                                    | No                                                          | No                                                                               |
| Symptoms Notes                                | Placement of a subdural to peritoneal shunt due to hydrocephalus. Surgery. | n/a. Suture removal.                                        | Extreme right leg pain. ER visit.                                                |
| <b>Visit 3</b>                                |                                                                            |                                                             |                                                                                  |
| Date of Visit (months from initial diagnosis) | 3                                                                          | 1                                                           | 0                                                                                |
| KPS                                           |                                                                            | 90                                                          | 100                                                                              |
| Mini Mental Status Exam Score                 | 28                                                                         |                                                             |                                                                                  |
| History of seizures since last visit          | No                                                                         | No                                                          | No                                                                               |
| Neurologic Deficit                            | Yes. Left leg weakness.                                                    | No                                                          | No                                                                               |

|                                               |                                                                                                            |                                                                                                                              |                                                          |
|-----------------------------------------------|------------------------------------------------------------------------------------------------------------|------------------------------------------------------------------------------------------------------------------------------|----------------------------------------------------------|
| Symptoms Notes                                | Maintenance TMZ planning                                                                                   | n/a. Mid radiation followup.                                                                                                 | n/a. Suture removal.                                     |
| <b>Visit 4</b>                                |                                                                                                            |                                                                                                                              |                                                          |
| Date of Visit (months from initial diagnosis) | 4                                                                                                          | 2                                                                                                                            | 1                                                        |
| KPS                                           | 70                                                                                                         | 90                                                                                                                           | 90                                                       |
| Mini Mental Status Exam Score                 |                                                                                                            |                                                                                                                              |                                                          |
| History of seizures since last visit          | Yes                                                                                                        | No                                                                                                                           | No                                                       |
| Neurologic Deficit                            | No                                                                                                         | No                                                                                                                           | No                                                       |
| Symptoms Notes                                | Rapid deterioration in gait and memory. Hold TMZ temporarily. MRI followup.                                | n/a. Post radiation followup.                                                                                                | Patient feels twisting/ripping in his abdomen. ER visit. |
| <b>Visit 5</b>                                |                                                                                                            |                                                                                                                              |                                                          |
| Date of Visit (months from initial diagnosis) | 5                                                                                                          | 3                                                                                                                            | 2                                                        |
| KPS                                           | 70                                                                                                         | 90                                                                                                                           | 90                                                       |
| Mini Mental Status Exam Score                 |                                                                                                            |                                                                                                                              |                                                          |
| History of seizures since last visit          | No                                                                                                         | No                                                                                                                           | No                                                       |
| Neurologic Deficit                            | Yes. Left-sided weakness.                                                                                  | No                                                                                                                           | No                                                       |
| Symptoms Notes                                | Substantial improvement in cognitive function and gait, worsening of left arm/shoulder pain. MRI followup. | Patient unintentionally started TMZ today instead of 4 wks ago, due to miscommunication/confusion. Maintenance TMZ followup. | Fairly significant fatigue. Maintenance TMZ planning.    |
| <b>Visit 6</b>                                |                                                                                                            |                                                                                                                              |                                                          |
| Date of Visit (months from initial diagnosis) |                                                                                                            | 4                                                                                                                            | 5                                                        |
| KPS                                           |                                                                                                            | 90                                                                                                                           | 90                                                       |
| Mini Mental Status Exam Score                 |                                                                                                            |                                                                                                                              |                                                          |
| History of seizures since last visit          |                                                                                                            | No                                                                                                                           | No                                                       |
| Neurologic Deficit                            |                                                                                                            | No                                                                                                                           | No                                                       |

|                                               |  |                                                                   |                                                                                 |
|-----------------------------------------------|--|-------------------------------------------------------------------|---------------------------------------------------------------------------------|
| Symptoms Notes                                |  | n/a. MRI scan followup.                                           | ER visit for syncopal episodes, most consistent with bradyarrhythmia. ER visit. |
| <b>Visit 7</b>                                |  |                                                                   |                                                                                 |
| Date of Visit (months from initial diagnosis) |  | 5                                                                 | 5                                                                               |
| KPS                                           |  | 90                                                                | 90                                                                              |
| Mini Mental Status Exam Score                 |  |                                                                   |                                                                                 |
| History of seizures since last visit          |  | Yes                                                               | No                                                                              |
| Neurologic Deficit                            |  | No                                                                | No                                                                              |
| Symptoms Notes                                |  | Took 300mg of TMZ instead of 400 mg TMZ. Neuro oncology followup. | n/a. MRI followup.                                                              |
| <b>Visit 8</b>                                |  |                                                                   |                                                                                 |
| Date of Visit (months from initial diagnosis) |  | 6                                                                 | 7                                                                               |
| KPS                                           |  | 90                                                                | 100                                                                             |
| Mini Mental Status Exam Score                 |  |                                                                   |                                                                                 |
| History of seizures since last visit          |  | No                                                                | No                                                                              |
| Neurologic Deficit                            |  | No                                                                | No                                                                              |
| Symptoms Notes                                |  | n/a. Neuro oncology followup.                                     | Mild fatigue, constipation, brief episode of near-syncope. MRI followup.        |
| <b>Visit 9</b>                                |  |                                                                   |                                                                                 |
| Date of Visit (months from initial diagnosis) |  | 7                                                                 | 9                                                                               |
| KPS                                           |  | 90                                                                | 90                                                                              |
| Mini Mental Status Exam Score                 |  |                                                                   |                                                                                 |
| History of seizures since last visit          |  | No                                                                | No                                                                              |
| Neurologic Deficit                            |  | No                                                                | No                                                                              |



|                                               |  |                                                                                                      |                                                                                                                     |
|-----------------------------------------------|--|------------------------------------------------------------------------------------------------------|---------------------------------------------------------------------------------------------------------------------|
| Symptoms Notes                                |  | n/a. Neuro oncology followup.                                                                        | n/a. MRI followup.                                                                                                  |
| <b>Visit 10</b>                               |  |                                                                                                      |                                                                                                                     |
| Date of Visit (months from initial diagnosis) |  | 8                                                                                                    | 11                                                                                                                  |
| KPS                                           |  | 90                                                                                                   | 90                                                                                                                  |
| Mini Mental Status Exam Score                 |  |                                                                                                      |                                                                                                                     |
| History of seizures since last visit          |  | No                                                                                                   | No                                                                                                                  |
| Neurologic Deficit                            |  | No                                                                                                   | No                                                                                                                  |
| Symptoms Notes                                |  | n/a. MRI followup.                                                                                   | Gradual increase in T2 signal is of unclear cause, changing treatment regimen from 5 to 21 day cycle. MRI followup. |
| <b>Visit 11</b>                               |  |                                                                                                      |                                                                                                                     |
| Date of Visit (months from initial diagnosis) |  | 10                                                                                                   | 13                                                                                                                  |
| KPS                                           |  | 80                                                                                                   | 90                                                                                                                  |
| Mini Mental Status Exam Score                 |  |                                                                                                      |                                                                                                                     |
| History of seizures since last visit          |  | No                                                                                                   | No                                                                                                                  |
| Neurologic Deficit                            |  | No                                                                                                   | No                                                                                                                  |
| Symptoms Notes                                |  | New MRI scan concerning for progressive disease, switching TMZ to 21 day regimen. MRI scan followup. | More difficulty in terms of prolonged fatigue, switching back to 5 day regimen. MRI followup.                       |
| <b>Visit 12</b>                               |  |                                                                                                      |                                                                                                                     |
| Date of Visit (months from initial diagnosis) |  | 11                                                                                                   | 15                                                                                                                  |
| KPS                                           |  | 80                                                                                                   |                                                                                                                     |
| Mini Mental Status Exam Score                 |  |                                                                                                      | 30                                                                                                                  |
| History of seizures since last visit          |  | No                                                                                                   | No                                                                                                                  |
| Neurologic Deficit                            |  | No                                                                                                   | No                                                                                                                  |

|                                               |  |                                                                       |                                                                                                  |
|-----------------------------------------------|--|-----------------------------------------------------------------------|--------------------------------------------------------------------------------------------------|
| Symptoms Notes                                |  | n/a. MRI followup.                                                    | n/a. MRI followup.                                                                               |
| <b>Visit 13</b>                               |  |                                                                       |                                                                                                  |
| Date of Visit (months from initial diagnosis) |  | 12                                                                    | 17                                                                                               |
| KPS                                           |  | 80                                                                    | 90                                                                                               |
| Mini Mental Status Exam Score                 |  |                                                                       |                                                                                                  |
| History of seizures since last visit          |  | No                                                                    | No                                                                                               |
| Neurologic Deficit                            |  | No                                                                    | No                                                                                               |
| Symptoms Notes                                |  | n/a. MRI followup.                                                    | n/a. Post-radiation followup.                                                                    |
| <b>Visit 14</b>                               |  |                                                                       |                                                                                                  |
| Date of Visit (months from initial diagnosis) |  | 14                                                                    | 19                                                                                               |
| KPS                                           |  | 80                                                                    | 80                                                                                               |
| Mini Mental Status Exam Score                 |  |                                                                       |                                                                                                  |
| History of seizures since last visit          |  | No                                                                    | Yes                                                                                              |
| Neurologic Deficit                            |  | No                                                                    | No                                                                                               |
| Symptoms Notes                                |  | Increasing enhancement worrisome for tumor progression. MRI followup. | Fatigue, some mild cognitive slowing. Drinks substantial amounts of alcohol daily. MRI followup. |
| <b>Visit 15</b>                               |  |                                                                       |                                                                                                  |
| Date of Visit (months from initial diagnosis) |  | 16                                                                    | 21                                                                                               |
| KPS                                           |  | 70                                                                    | 90                                                                                               |
| Mini Mental Status Exam Score                 |  |                                                                       |                                                                                                  |
| History of seizures since last visit          |  | No                                                                    | No                                                                                               |
| Neurologic Deficit                            |  | No                                                                    | No                                                                                               |
| Symptoms Notes                                |  | Progressive disease evident. MRI followup.                            | Continues to do reasonably well from clinical standpoint and the MRI scan is stable.             |

| <b>Visit 16</b>                               |  |                                                                                           |                                                                                                                   |
|-----------------------------------------------|--|-------------------------------------------------------------------------------------------|-------------------------------------------------------------------------------------------------------------------|
| Date of Visit (months from initial diagnosis) |  | 16                                                                                        | 23                                                                                                                |
| KPS                                           |  | 80                                                                                        | 80                                                                                                                |
| Mini Mental Status Exam Score                 |  |                                                                                           |                                                                                                                   |
| History of seizures since last visit          |  | Yes                                                                                       | No                                                                                                                |
| Neurologic Deficit                            |  | No                                                                                        | No                                                                                                                |
| Symptoms Notes                                |  | n/a. Begin CCNU the following week, then Avastin the week after. post surg. mri followup. | New MRI scan of the brain shows no change compared to prior studies. This is consistent with stable disease.      |
| <b>Visit 17</b>                               |  |                                                                                           |                                                                                                                   |
| Date of Visit (months from initial diagnosis) |  | 18                                                                                        | 26                                                                                                                |
| KPS                                           |  | 80                                                                                        | 90                                                                                                                |
| Mini Mental Status Exam Score                 |  |                                                                                           |                                                                                                                   |
| History of seizures since last visit          |  | No                                                                                        | No                                                                                                                |
| Neurologic Deficit                            |  | No                                                                                        | No                                                                                                                |
| Symptoms Notes                                |  | n/a. MRI followup.                                                                        | New MRI scan of the brain shows no changes compared to prior studies. There is no evidence for recurrent disease. |
| <b>Visit 18</b>                               |  |                                                                                           |                                                                                                                   |
| Date of Visit (months from initial diagnosis) |  | 20                                                                                        | 28                                                                                                                |
| KPS                                           |  | 70                                                                                        | 90                                                                                                                |
| Mini Mental Status Exam Score                 |  |                                                                                           |                                                                                                                   |
| History of seizures since last visit          |  | Yes                                                                                       | No                                                                                                                |
| Neurologic Deficit                            |  | No                                                                                        | No                                                                                                                |

|                                               |  |                                                                                                                                                                                                        |                                                                                                                                                                   |
|-----------------------------------------------|--|--------------------------------------------------------------------------------------------------------------------------------------------------------------------------------------------------------|-------------------------------------------------------------------------------------------------------------------------------------------------------------------|
| Symptoms Notes                                |  | Hypotension; found diaphoretic and unresponsive. ER visit.                                                                                                                                             | No new issues. No seizures. He is getting minimal exercise.                                                                                                       |
| <b>Visit 19</b>                               |  |                                                                                                                                                                                                        |                                                                                                                                                                   |
| Date of Visit (months from initial diagnosis) |  | 24                                                                                                                                                                                                     | 30                                                                                                                                                                |
| KPS                                           |  | 80                                                                                                                                                                                                     | 80                                                                                                                                                                |
| Mini Mental Status Exam Score                 |  |                                                                                                                                                                                                        |                                                                                                                                                                   |
| History of seizures since last visit          |  | No                                                                                                                                                                                                     | No                                                                                                                                                                |
| Neurologic Deficit                            |  | No                                                                                                                                                                                                     | No                                                                                                                                                                |
| Symptoms Notes                                |  | New MRI scan of the brain shows marked improvement with complete resolution of abnormal contrast enhancement in bilateral frontal and colossal regions.                                                | Doing well except for daytime fatigue and sleepiness. Continues to do well from clinical and radiographic standpoints.                                            |
| <b>Visit 20</b>                               |  |                                                                                                                                                                                                        |                                                                                                                                                                   |
| Date of Visit (months from initial diagnosis) |  | 27                                                                                                                                                                                                     | 32                                                                                                                                                                |
| KPS                                           |  | 60                                                                                                                                                                                                     | 80                                                                                                                                                                |
| Mini Mental Status Exam Score                 |  |                                                                                                                                                                                                        |                                                                                                                                                                   |
| History of seizures since last visit          |  | No                                                                                                                                                                                                     | No                                                                                                                                                                |
| Neurologic Deficit                            |  | No                                                                                                                                                                                                     | No                                                                                                                                                                |
| Symptoms Notes                                |  | GBM with subsequent development of hydrocephalus s/p VP shunt placement. He has seen a progressive decline over the past two weeks which is concerning for tumor progression and/or shunt malfunction. | He is doing well and has no new concerns or complaints. He continues to struggle with daytime fatigue despite Nuvigil. He denies any new or progressive symptoms. |
| <b>Visit 21</b>                               |  |                                                                                                                                                                                                        |                                                                                                                                                                   |

|                                               |  |  |                                                                                                                                      |
|-----------------------------------------------|--|--|--------------------------------------------------------------------------------------------------------------------------------------|
| Date of Visit (months from initial diagnosis) |  |  | 34                                                                                                                                   |
| KPS                                           |  |  | 80                                                                                                                                   |
| Mini Mental Status Exam Score                 |  |  |                                                                                                                                      |
| History of seizures since last visit          |  |  | No                                                                                                                                   |
| Neurologic Deficit                            |  |  | No                                                                                                                                   |
| Symptoms Notes                                |  |  | No new problems. Still with fatigue. Doing well clinically and radiographically.                                                     |
| <b>Visit 22</b>                               |  |  |                                                                                                                                      |
| Date of Visit (months from initial diagnosis) |  |  | 36                                                                                                                                   |
| KPS                                           |  |  | 80                                                                                                                                   |
| Mini Mental Status Exam Score                 |  |  |                                                                                                                                      |
| History of seizures since last visit          |  |  | No                                                                                                                                   |
| Neurologic Deficit                            |  |  | No                                                                                                                                   |
| Symptoms Notes                                |  |  | Fatigue but no other new issues. Sleeping several hours during the day. No seizures or headaches. No evidence for progressive tumor. |
| <b>Visit 23</b>                               |  |  |                                                                                                                                      |
| Date of Visit (months from initial diagnosis) |  |  | 38                                                                                                                                   |
| KPS                                           |  |  | 80                                                                                                                                   |
| Mini Mental Status Exam Score                 |  |  |                                                                                                                                      |
| History of seizures since last visit          |  |  | No                                                                                                                                   |
| Neurologic Deficit                            |  |  | No                                                                                                                                   |
| Symptoms Notes                                |  |  | Follow up visit in 2 months with a new MRI scan prior.                                                                               |
| <b>Visit 24</b>                               |  |  |                                                                                                                                      |
| Date of Visit (months from initial diagnosis) |  |  | 40                                                                                                                                   |
| KPS                                           |  |  | 80                                                                                                                                   |
| Mini Mental Status Exam Score                 |  |  |                                                                                                                                      |

|                                               |  |  |                                                                     |
|-----------------------------------------------|--|--|---------------------------------------------------------------------|
| History of seizures since last visit          |  |  | No                                                                  |
| Neurologic Deficit                            |  |  | No                                                                  |
| Symptoms Notes                                |  |  | Excellent stable course from radiographic and clinical standpoints. |
| <b>Visit 25</b>                               |  |  |                                                                     |
| Date of Visit (months from initial diagnosis) |  |  | 42                                                                  |
| KPS                                           |  |  | 80                                                                  |
| Mini Mental Status Exam Score                 |  |  |                                                                     |
| History of seizures since last visit          |  |  | No                                                                  |
| Neurologic Deficit                            |  |  | No                                                                  |
| Symptoms Notes                                |  |  | No new problems. Previously noted fatigue. No seizures.             |
| <b>Visit 26</b>                               |  |  |                                                                     |
| Date of Visit (months from initial diagnosis) |  |  | 44                                                                  |
| KPS                                           |  |  | 80                                                                  |
| Mini Mental Status Exam Score                 |  |  |                                                                     |
| History of seizures since last visit          |  |  | No                                                                  |
| Neurologic Deficit                            |  |  | No                                                                  |
| Symptoms Notes                                |  |  | Follow up visit in 2 months with a new MRI scan prior.              |
| <b>Visit 27</b>                               |  |  |                                                                     |
| Date of Visit (months from initial diagnosis) |  |  | 46                                                                  |
| KPS                                           |  |  | 80                                                                  |
| Mini Mental Status Exam Score                 |  |  |                                                                     |
| History of seizures since last visit          |  |  | No                                                                  |
| Neurologic Deficit                            |  |  | No                                                                  |

|                                               |    |    |                                                                                                                                                                                                                                                                                               |
|-----------------------------------------------|----|----|-----------------------------------------------------------------------------------------------------------------------------------------------------------------------------------------------------------------------------------------------------------------------------------------------|
| Symptoms Notes                                |    |    | Presents for interval follow-up with surveillance MRI on observation, as a new patient to me.                                                                                                                                                                                                 |
| <b>Visit 28</b>                               |    |    |                                                                                                                                                                                                                                                                                               |
| Date of Visit (months from initial diagnosis) |    |    | 48                                                                                                                                                                                                                                                                                            |
| KPS                                           |    |    | 90                                                                                                                                                                                                                                                                                            |
| Mini Mental Status Exam Score                 |    |    |                                                                                                                                                                                                                                                                                               |
| History of seizures since last visit          |    |    | No                                                                                                                                                                                                                                                                                            |
| Neurologic Deficit                            |    |    | No                                                                                                                                                                                                                                                                                            |
| Symptoms Notes                                |    |    | Presents for interval follow-up with surveillance MRI on observation, now 4 years out from diagnosis, on observation since almost 3 years. Denies new or progressive symptoms. He remotely had one event consistent with possible seizure for which he as remained on Keppra for prophylaxis. |
| <b>Clinical Trials</b>                        |    |    |                                                                                                                                                                                                                                                                                               |
| 1                                             | // | // | NovoCure                                                                                                                                                                                                                                                                                      |

| Patient ID                           | W33-1-1 | W34-1-1 | W36-1-1 |
|--------------------------------------|---------|---------|---------|
| <b>Patient Information</b>           |         |         |         |
| Gender                               | Male    | Male    | Male    |
| Age at Initial Diagnosis             | 61      | 74      | 62      |
| Weight                               | 83.5 kg | 95.7 kg | 88.5 kg |
| Height                               | 183 cm  | 185 cm  | 178 cm  |
| KPS                                  | 80 (?)  | 90 (?)  | 80 (?)  |
| Mini Mental Status Exam Score        | 25      |         | 26      |
| History of Seizures Since Last Visit | No      | No      | No      |

| Neurologic Deficit                    | No                                                                                                        | Yes. Left/Right. Expressive speech problem.                                     | Yes. Right.                       |
|---------------------------------------|-----------------------------------------------------------------------------------------------------------|---------------------------------------------------------------------------------|-----------------------------------|
| Presentation Symptoms                 | Fell from bicycle recently. After the fall he had mild headache, confusion, and difficulty concentrating. | One week history of expressive speech problems following aortic root angiogram. | Blurry vision in in his right eye |
| Time to Progression                   | NA                                                                                                        | 170 days                                                                        | 241 days                          |
| Overall Survival                      | NA                                                                                                        | 351 days                                                                        | 544 days                          |
| Time to Last Follow-up                | 1315 days                                                                                                 | NA                                                                              | NA                                |
| Cause Of Death                        | //                                                                                                        | Tumor progression                                                               | Tumor progression                 |
| <b>Tumor Information</b>              |                                                                                                           |                                                                                 |                                   |
| <b>Tumor 1</b>                        |                                                                                                           |                                                                                 |                                   |
| Date (months from initial diagnosis)  | 0                                                                                                         | 0                                                                               | 0                                 |
| Diagnosis                             | Astrocytic tumor                                                                                          | Astrocytic tumor                                                                | Astrocytic tumor                  |
| Grade                                 | Glioblastoma WHO grade IV                                                                                 | Glioblastoma WHO grade IV                                                       | Glioblastoma WHO grade IV         |
| Location                              | Right Parietal                                                                                            | Left Temporal                                                                   | Left Parietal                     |
| <b>Medications</b>                    |                                                                                                           |                                                                                 |                                   |
| <b>Medication 1</b>                   |                                                                                                           |                                                                                 |                                   |
| Category                              | Antihypertensive                                                                                          | Antihypertensive                                                                | Cholesterol Lowering              |
| Drug Name                             | Hydrochlorothiazide                                                                                       | Losartan (COZAAR)                                                               | Atorvastatin                      |
| Start (months from initial diagnosis) | -1                                                                                                        | -1                                                                              | 0                                 |
| Total Daily Dosage                    | 25mg daily oral                                                                                           | 50 mg daily oral                                                                | 10mg QD                           |
| End (months from initial diagnosis)   | 4                                                                                                         | 0                                                                               | //                                |
| <b>Medication 2</b>                   |                                                                                                           |                                                                                 |                                   |
| Category                              | Steroids                                                                                                  | Multi-vitamin                                                                   | Steroids                          |
| Drug Name                             | Dexamethasone                                                                                             |                                                                                 | Dexamethasone                     |
| Start (months from initial diagnosis) | 0                                                                                                         | -1                                                                              | 0                                 |
| Total Daily Dosage                    | 4mg QID taper to 1mg QD                                                                                   | 1 cap daily                                                                     | 4mg QID taper to 1mg QD           |
| End (months from initial diagnosis)   | 2                                                                                                         | 2                                                                               | 1                                 |
| <b>Medication 3</b>                   |                                                                                                           |                                                                                 |                                   |
| Category                              | Anti-epileptic                                                                                            | Steroids                                                                        | Antihypertensive                  |
| Drug Name                             | KEPPRA                                                                                                    | Dexamethasone                                                                   | Metoprolol XL (TOPROL XL)         |
| Start (months from initial diagnosis) | 0                                                                                                         | -1                                                                              | 0                                 |



|                                       |                                  |                                                                                                          |                         |
|---------------------------------------|----------------------------------|----------------------------------------------------------------------------------------------------------|-------------------------|
| Total Daily Dosage                    | 1000mg BID decrease to 500mg BID | 4mg/mL intravenous 4 times a day                                                                         | 50mg QD                 |
| End (months from initial diagnosis)   | 3                                | 0                                                                                                        | 1                       |
| <b>Medication 4</b>                   |                                  |                                                                                                          |                         |
| Category                              | Cholesterol Lowering             | Anti-epileptic                                                                                           | Anti-depressant         |
| Drug Name                             | Simvastatin                      | KEPPRA                                                                                                   | Sertraline              |
| Start (months from initial diagnosis) | 0                                | -1                                                                                                       | 0                       |
| Total Daily Dosage                    | 40mg QD                          | 500 mg x 2caps twice a day oral                                                                          | 50mg QD                 |
| End (months from initial diagnosis)   | 0                                | 8                                                                                                        | 1                       |
| <b>Medication 5</b>                   |                                  |                                                                                                          |                         |
| Category                              | Multi-vitamin                    | Steroids                                                                                                 | Anti-epileptic          |
| Drug Name                             |                                  | Dexamethasone                                                                                            | Rosuvastatin (CRESTOR)  |
| Start (months from initial diagnosis) | 3                                | 0                                                                                                        | 0                       |
| Total Daily Dosage                    | 1 cap daily oral                 | 4mg 3 times a day, 3mg 3 times a day, 3mg twice a day, 2mg twice a day, 1mg twice a day, 1 mg daily oral | 10 mg daily oral        |
| End (months from initial diagnosis)   | 4                                | 0                                                                                                        | 0                       |
| <b>Medication 6</b>                   |                                  |                                                                                                          |                         |
| Category                              | Cholesterol Lowering             | Antihypertensive                                                                                         | Anti-epileptic          |
| Drug Name                             | Simvastatin                      | Metoprolol (LOPRESSOR)                                                                                   | KEPPRA                  |
| Start (months from initial diagnosis) | 4                                | 0                                                                                                        | 0                       |
| Total Daily Dosage                    | 40 mg daily oral                 | 25 mg twice a day for 7 days then 50 mg twice a day oral                                                 | 1000mg twice a day oral |
| End (months from initial diagnosis)   | 4                                | 2                                                                                                        | 15                      |
| <b>Medication 7</b>                   |                                  |                                                                                                          |                         |
| Category                              | Antihypertensive                 | Steroids                                                                                                 | Multi-vitamin           |
| Drug Name                             | Hydrochlorothiazide              | Dexamethasone                                                                                            | ONE-A-DAY               |
| Start (months from initial diagnosis) | 9                                | 2                                                                                                        | 1                       |
| Total Daily Dosage                    | 25mg daily oral                  | 2 mg oral twice a day                                                                                    | 1 cap daily oral        |
| End (months from initial diagnosis)   | 10                               | 3                                                                                                        | 1                       |
| <b>Medication 8</b>                   |                                  |                                                                                                          |                         |
| Category                              | Anti-epileptic                   | Steroids                                                                                                 | Antihypertensive        |
| Drug Name                             | Gabapentin                       | Prednisone                                                                                               | Verapamil (ISOPTIN)     |
| Start (months from initial diagnosis) | 11                               | 4                                                                                                        | 1                       |

|                                       |                                                      |                                      |                  |
|---------------------------------------|------------------------------------------------------|--------------------------------------|------------------|
| Total Daily Dosage                    | 300 mg 3 times a day, 300 mg twice a day oral        | 10 mg twice a day oral               | 2.5 mg injection |
| End (months from initial diagnosis)   | 17                                                   | 6                                    | //               |
| <b>Medication 9</b>                   |                                                      |                                      |                  |
| Category                              | Anti-epileptic                                       | Steroids                             | Cardiotonic      |
| Drug Name                             | Gabapentin                                           | Dexamethasone                        | Clopidogrel      |
| Start (months from initial diagnosis) | 17                                                   | 6                                    | 1                |
| Total Daily Dosage                    | 300 mg in the morning and 400 mg in the evening oral | 4 mg twice a day till 0.5 daily oral | 75mg QD          |
| End (months from initial diagnosis)   | 19                                                   | 7                                    | //               |
| <b>Medication 10</b>                  |                                                      |                                      |                  |
| Category                              | Anti-epileptic                                       | Antihypertensive                     |                  |
| Drug Name                             | Gabapentin                                           | Amlodipine (NORVASC)                 |                  |
| Start (months from initial diagnosis) | 19                                                   | 8                                    |                  |
| Total Daily Dosage                    | 100 mg in the morning and 400 mg in the evening oral | 2.5 mg daily oral                    |                  |
| End (months from initial diagnosis)   | 27                                                   | 9                                    |                  |
| <b>Medication 11</b>                  |                                                      |                                      |                  |
| Category                              | Anti-depressant                                      |                                      |                  |
| Drug Name                             | Citalopram (CELEXA)                                  |                                      |                  |
| Start (months from initial diagnosis) | 21                                                   |                                      |                  |
| Total Daily Dosage                    | 20 mg at bedtime oral                                |                                      |                  |
| End (months from initial diagnosis)   | 44                                                   |                                      |                  |
| <b>Medication 12</b>                  |                                                      |                                      |                  |
| Category                              | Anti-epileptic                                       |                                      |                  |
| Drug Name                             | KEPPRA                                               |                                      |                  |
| Start (months from initial diagnosis) | 27                                                   |                                      |                  |
| Total Daily Dosage                    | 500 mg twice a day oral                              |                                      |                  |
| End (months from initial diagnosis)   | 28                                                   |                                      |                  |
| <b>Medication 13</b>                  |                                                      |                                      |                  |
| Category                              | Anti-epileptic                                       |                                      |                  |
| Drug Name                             | KEPPRA                                               |                                      |                  |
| Start (months from initial diagnosis) | 29                                                   |                                      |                  |
| Total Daily Dosage                    | 1000 mg twice a day oral                             |                                      |                  |
| End (months from initial diagnosis)   | 30                                                   |                                      |                  |
| <b>Medication 14</b>                  |                                                      |                                      |                  |

|                                                 |                                |                           |                           |
|-------------------------------------------------|--------------------------------|---------------------------|---------------------------|
| Category                                        | Anti-epileptic                 |                           |                           |
| Drug Name                                       | KEPPRA                         |                           |                           |
| Start (months from initial diagnosis)           | 32                             |                           |                           |
| Total Daily Dosage                              | 1000 mg twice daily oral       |                           |                           |
| End (months from initial diagnosis)             | 34                             |                           |                           |
| <b>Medication 15</b>                            |                                |                           |                           |
| Category                                        | Anti-epileptic                 |                           |                           |
| Drug Name                                       | KEPPRA                         |                           |                           |
| Start (months from initial diagnosis)           | 34                             |                           |                           |
| Total Daily Dosage                              | 1000 mg AM and 1500 mg PM oral |                           |                           |
| End (months from initial diagnosis)             | 40                             |                           |                           |
| <b>Medication 16</b>                            |                                |                           |                           |
| Category                                        | Anti-epileptic                 |                           |                           |
| Drug Name                                       | KEPPRA                         |                           |                           |
| Start (months from initial diagnosis)           | 40                             |                           |                           |
| Total Daily Dosage                              | 1500 mg twice a day oral       |                           |                           |
| End (months from initial diagnosis)             | 44                             |                           |                           |
| <b>Surgery</b>                                  |                                |                           |                           |
| <b>Surgery 1</b>                                |                                |                           |                           |
| Date of Surgery (months from initial diagnosis) | 0                              | 0                         | 0                         |
| Gliadel                                         | No                             | No                        | No                        |
| Awake mapping                                   | No                             | Yes                       | Yes                       |
| Stealth scan                                    | Yes                            | Yes                       | Yes                       |
| <b>Tissue Diagnosis</b>                         |                                |                           |                           |
| <b>Tissue 1</b>                                 |                                |                           |                           |
| Serial Number                                   | W33-1-1, SN245                 | W34-1-1, SN248            | W36-1-1, SN250            |
| Diagnosis                                       | Glioblastoma WHO grade IV      | Glioblastoma WHO grade IV | Glioblastoma WHO grade IV |
| Location                                        | Right Parietal                 | Left Temporal             | Left Parietal             |
| Extent                                          | Complete resection             | Complete resection        | Subtotal resection 90%    |
| MRI confirmation                                | Yes                            | Yes                       | Yes                       |
| <b>Chemotherapy</b>                             |                                |                           |                           |
| <b>Medication 1</b>                             |                                |                           |                           |

|                                       |                                       |                                 |                        |
|---------------------------------------|---------------------------------------|---------------------------------|------------------------|
| Drug Name                             | Temozolomide                          | Temozolomide                    | Temozolomide           |
| Start (months from initial diagnosis) | 0                                     | 0                               | 0                      |
| Dosage                                | 140mg QD                              | 150mg                           | 140mg QD               |
| End (months from initial diagnosis)   | 2                                     | 2                               | 2                      |
| Description                           | Concurrent                            | Concurrent                      | Concurrent             |
| <b>Medication 2</b>                   |                                       |                                 |                        |
| Drug Name                             | Temozolomide                          | Temozolomide                    | Temozolomide           |
| Start (months from initial diagnosis) | 2                                     | 3                               | 3                      |
| Dosage                                | 300mg QD increase to<br>360mg QD      | 300mg                           | 140-280mg              |
| End (months from initial diagnosis)   | 15                                    | 3                               | 15                     |
| Description                           | maintenance once a month<br>5d cycles | maintenance 5x/mo.              | maintenance x4/28 days |
| <b>Medication 3</b>                   |                                       |                                 |                        |
| Drug Name                             |                                       | Temozolomide                    | Avastin                |
| Start (months from initial diagnosis) |                                       | 3                               | 8                      |
| Dosage                                |                                       | 360mg                           | 10mg/kg (735mg)        |
| End (months from initial diagnosis)   |                                       | 6                               | 12                     |
| Description                           |                                       | maintenance 5x/mo.              | x1 / 14 days           |
| <b>Medication 4</b>                   |                                       |                                 |                        |
| Drug Name                             |                                       | Temozolomide                    | Avastin                |
| Start (months from initial diagnosis) |                                       | 6                               | 13                     |
| Dosage                                |                                       | 140mg                           | 10 mg/kg               |
| End (months from initial diagnosis)   |                                       | 7                               | 17                     |
| Description                           |                                       | concurrent w/ cyberknife,<br>QD | x1 / 21 days           |
| <b>Medication 5</b>                   |                                       |                                 |                        |
| Drug Name                             |                                       | Avastin                         | Lomustine              |
| Start (months from initial diagnosis) |                                       | 6                               | 13                     |
| Dosage                                |                                       | 1000mg                          | 210mg                  |
| End (months from initial diagnosis)   |                                       |                                 | 14                     |
| Description                           |                                       | maintenance 1x/14 days          | x1 / 42 days           |
| <b>Medication 6</b>                   |                                       |                                 |                        |

|                                                   |                            |                            |                            |
|---------------------------------------------------|----------------------------|----------------------------|----------------------------|
| Drug Name                                         |                            | Temozolomide               | Etoposide                  |
| Start (months from initial diagnosis)             |                            | 7                          | 14                         |
| Dosage                                            |                            | 280mg                      | 1600mg                     |
| End (months from initial diagnosis)               |                            |                            | 15                         |
| Description                                       |                            | maintenance 5x/28 days     | 21x/ 28 days               |
| <b>Radiation Therapy</b>                          |                            |                            |                            |
| <b>Medication 1</b>                               |                            |                            |                            |
| Type                                              | IMRT                       | IMRT                       | IMRT                       |
| Start (months from initial diagnosis)             | 0                          | 0                          | 0                          |
| Dosage                                            | 4600cGy                    | 6000cGy                    | 46Gy                       |
| End (months from initial diagnosis)               | 1                          | 2                          | 1                          |
| Description                                       |                            | Concurrent                 |                            |
| Fraction                                          | 23                         |                            | 23                         |
| <b>Medication 2</b>                               |                            |                            |                            |
| Type                                              | IMRT                       | Stereotactic               | IMRT                       |
| Start (months from initial diagnosis)             | 1                          | 6                          | 1                          |
| Dosage                                            | 1400cGy                    | 2400cGy                    | 14Gy                       |
| End (months from initial diagnosis)               | 2                          | 6                          | 2                          |
| Description                                       | Boost                      | Cyberknife                 | Boost                      |
| Fraction                                          | 7                          | 3                          | 7                          |
| <b>Pathology</b>                                  |                            |                            |                            |
| <b>Surgery 1</b>                                  |                            |                            |                            |
| Date Of Report<br>(months from initial diagnosis) | 0                          | 0                          | 0                          |
| <b>Report</b>                                     |                            |                            |                            |
| Location                                          | Tissue: W33-1-1, SN245     | Tissue: W34-1-1, SN248     | Tissue: W36-1-1, SN250     |
| Histopathology                                    | Glioblastoma, WHO grade IV | Glioblastoma, WHO grade IV | Glioblastoma, WHO grade IV |
| 1p19q_deletion                                    | Negative                   | Negative                   | Negative                   |
| EGFR                                              | amplification              | gain                       | gain                       |
| PTEN                                              | loss                       | deletion                   | gain                       |
| MGMT PCR                                          | methylated                 | unmethylated               | unmethylated               |
| MGMT IHC                                          | 25%                        | 50%                        | 70%                        |
| MGMT MS-MLPA:R1                                   | methylated (0.51)          | unmethylated (0.29)        | methylated (0.33)          |

|                                               |                                                                                                                 |                                                     |                                                                                             |
|-----------------------------------------------|-----------------------------------------------------------------------------------------------------------------|-----------------------------------------------------|---------------------------------------------------------------------------------------------|
| MGMT MS-MLPA:R2                               | unmethylated (0.13)                                                                                             | unmethylated (0.05)                                 | unmethylated (0.04)                                                                         |
| MGMT MS-MLPA:R3                               | methylated (0.32)                                                                                               | unmethylated (0.03)                                 | unmethylated (0.03)                                                                         |
| IDH1 mutation                                 | wildtype                                                                                                        | wildtype                                            | wildtype                                                                                    |
| EGFR vIII                                     | not detected                                                                                                    | not detected                                        | not detected                                                                                |
| <b>Follow-up Clinic Visit</b>                 |                                                                                                                 |                                                     |                                                                                             |
| <b>Visit 1</b>                                |                                                                                                                 |                                                     |                                                                                             |
| Date of Visit (months from initial diagnosis) | 0                                                                                                               | 0                                                   | 0                                                                                           |
| KPS                                           |                                                                                                                 | 90                                                  | 90                                                                                          |
| Mini Mental Status Exam Score                 | 25                                                                                                              |                                                     |                                                                                             |
| History of seizures since last visit          | No                                                                                                              | No                                                  | No                                                                                          |
| Neurologic Deficit                            | Yes. Left. Difficulty with left-sided vision.                                                                   | No. Expressive aphasia.                             | No                                                                                          |
| Symptoms Notes                                | Post surgery followup.                                                                                          | Expressive aphasia improvng. Post surgery followup. | Chronic back pain, difficulty in cognitive retention and reading words. Radiation planning. |
| <b>Visit 2</b>                                |                                                                                                                 |                                                     |                                                                                             |
| Date of Visit (months from initial diagnosis) | 2                                                                                                               | 0                                                   | 2                                                                                           |
| KPS                                           | 90                                                                                                              | 90                                                  | 90                                                                                          |
| Mini Mental Status Exam Score                 |                                                                                                                 |                                                     |                                                                                             |
| History of seizures since last visit          | Yes                                                                                                             | No                                                  | No                                                                                          |
| Neurologic Deficit                            | Yes. Left. Difficulty with left-sided vision.                                                                   | No. Expressive aphasia.                             | No                                                                                          |
| Symptoms Notes                                | Other than fatigue, anorexia, and constipation, patient tolerated the treatments well. Post radiation followup. | n/a. Chemoradiation planning.                       | Poor cognitive function. Chemotherapy planning.                                             |
| <b>Visit 3</b>                                |                                                                                                                 |                                                     |                                                                                             |
| Date of Visit (months from initial diagnosis) | 4                                                                                                               | 1                                                   | 3                                                                                           |
| KPS                                           | 80                                                                                                              | 90                                                  | 80                                                                                          |
| Mini Mental Status Exam Score                 |                                                                                                                 |                                                     |                                                                                             |
| History of seizures since last visit          | No                                                                                                              | No                                                  | No                                                                                          |
| Neurologic Deficit                            | Yes. Left. Difficulty with left-sided vision.                                                                   | No. Expressive aphasia.                             | Yes. Left.                                                                                  |

|                                               |                                                                                                                                                                                                            |                                                                                                                                                                      |                                                          |
|-----------------------------------------------|------------------------------------------------------------------------------------------------------------------------------------------------------------------------------------------------------------|----------------------------------------------------------------------------------------------------------------------------------------------------------------------|----------------------------------------------------------|
| Symptoms Notes                                | Gradually progressive neurologic symptoms. Continues to be plagued by fatigue, anorexia, occasional nausea with vomiting, some urinary urgency, and unsteadiness on his feet. Has hydrocephalus. MRI scan. | Speech has been gradually improving. Chemoradiation followup.                                                                                                        | Difficulties with word finding skills, left eye fatigue. |
| <b>Visit 4</b>                                |                                                                                                                                                                                                            |                                                                                                                                                                      |                                                          |
| Date of Visit (months from initial diagnosis) | 4                                                                                                                                                                                                          | 2                                                                                                                                                                    | 5                                                        |
| KPS                                           | 80                                                                                                                                                                                                         | 80                                                                                                                                                                   | 90                                                       |
| Mini Mental Status Exam Score                 |                                                                                                                                                                                                            |                                                                                                                                                                      |                                                          |
| History of seizures since last visit          | No                                                                                                                                                                                                         | No                                                                                                                                                                   | No                                                       |
| Neurologic Deficit                            | Yes. Left. Difficulty with left-sided vision.                                                                                                                                                              | No. Expressive aphasia.                                                                                                                                              | No. Expressive dysphasia.                                |
| Symptoms Notes                                | Complains of fatigue, gait disturbance, urinary incontinence, and occasional nausea. Proceeded with left ventriculoperitoneal shunt placement for hydrocephalus.                                           | ER hospitalization for about a week due to imbalance, hypotension, development of pneumonia, and overall failure to thrive; initiated dexamethasone taper. ER visit. |                                                          |
| <b>Visit 5</b>                                |                                                                                                                                                                                                            |                                                                                                                                                                      |                                                          |
| Date of Visit (months from initial diagnosis) | 6                                                                                                                                                                                                          | 2                                                                                                                                                                    | 5                                                        |
| KPS                                           | 90                                                                                                                                                                                                         | 90                                                                                                                                                                   | 90                                                       |
| Mini Mental Status Exam Score                 |                                                                                                                                                                                                            |                                                                                                                                                                      |                                                          |
| History of seizures since last visit          | No                                                                                                                                                                                                         | No                                                                                                                                                                   | No                                                       |
| Neurologic Deficit                            | Yes. Left. Difficulty with left-sided vision.                                                                                                                                                              | No. Expressive aphasia.                                                                                                                                              | No. Expressive dysphasia.                                |

|                                               |                                                                                                                    |                                                                                                                         |                                                                                  |
|-----------------------------------------------|--------------------------------------------------------------------------------------------------------------------|-------------------------------------------------------------------------------------------------------------------------|----------------------------------------------------------------------------------|
| Symptoms Notes                                | Marked decrease in size of the ventricular system after placement of the posterior left-sided shunt. MRI followup. | Speech gradually improving. Radiation followup.                                                                         | Lower back pain.                                                                 |
| <b>Visit 6</b>                                |                                                                                                                    |                                                                                                                         |                                                                                  |
| Date of Visit (months from initial diagnosis) | 7                                                                                                                  | 2                                                                                                                       | 7                                                                                |
| KPS                                           | 80                                                                                                                 | 80                                                                                                                      |                                                                                  |
| Mini Mental Status Exam Score                 |                                                                                                                    |                                                                                                                         | 26                                                                               |
| History of seizures since last visit          | No                                                                                                                 | No                                                                                                                      | No                                                                               |
| Neurologic Deficit                            | Yes. Left eye difficulty.                                                                                          | No. Expressive aphasia.                                                                                                 | No                                                                               |
| Symptoms Notes                                | Slight itching, nausea, and chills.                                                                                | Admitted to hospital with progressive weakness and dizziness, intermittent loss of hearing in left ear. Hospital visit. | Constipation after TMZ cycle causes near debilitating low back pain. MRI review. |
| <b>Visit 7</b>                                |                                                                                                                    |                                                                                                                         |                                                                                  |
| Date of Visit (months from initial diagnosis) | 7                                                                                                                  | 3                                                                                                                       | 7                                                                                |
| KPS                                           | 90                                                                                                                 | 80                                                                                                                      | 80                                                                               |
| Mini Mental Status Exam Score                 |                                                                                                                    |                                                                                                                         |                                                                                  |
| History of seizures since last visit          | No                                                                                                                 | No                                                                                                                      | No                                                                               |
| Neurologic Deficit                            | Yes. Left eye difficulty.                                                                                          | No. Expressive aphasia.                                                                                                 | No                                                                               |
| Symptoms Notes                                | Once per day, patient has 1-2 min episode of moving visual phenomenon in both visual fields. MRI followup.         | n/a. Radiation followup.                                                                                                | Progressive disease. MRI scan.                                                   |
| <b>Visit 8</b>                                |                                                                                                                    |                                                                                                                         |                                                                                  |
| Date of Visit (months from initial diagnosis) | 9                                                                                                                  | 3                                                                                                                       | 8                                                                                |
| KPS                                           | 90                                                                                                                 | 90                                                                                                                      | 80                                                                               |
| Mini Mental Status Exam Score                 |                                                                                                                    |                                                                                                                         |                                                                                  |



|                                               |                                                                                       |                                                      |                                                                                              |
|-----------------------------------------------|---------------------------------------------------------------------------------------|------------------------------------------------------|----------------------------------------------------------------------------------------------|
| History of seizures since last visit          | No                                                                                    | No                                                   | Yes                                                                                          |
| Neurologic Deficit                            | Yes. Left eye difficulty.                                                             | No. Expressive aphasia.                              | No                                                                                           |
| Symptoms Notes                                | Dark-colored rash over his right shoulder and right back, 1 brief hive. MRI followup. | Patient doing well, increasing TMZ dosage to 360 mg. | Surgeon decided not to subject the patient to repeat craniotomy, started on Avastin instead. |
| <b>Visit 9</b>                                |                                                                                       |                                                      |                                                                                              |
| Date of Visit (months from initial diagnosis) | 11                                                                                    | 4                                                    | 9                                                                                            |
| KPS                                           | 80                                                                                    | 90                                                   | 80                                                                                           |
| Mini Mental Status Exam Score                 |                                                                                       |                                                      |                                                                                              |
| History of seizures since last visit          | No                                                                                    | No                                                   | No                                                                                           |
| Neurologic Deficit                            | Yes. Left eye difficulty.                                                             | No. Expressive aphasia.                              | No                                                                                           |
| Symptoms Notes                                | Restless leg syndrome (left leg) more noticeable recently. MRI followup.              | n/a. Maintenance TMZ followup.                       | Scan shows marked interval reduction in abnormal enhancement around his tumor.               |
| <b>Visit 10</b>                               |                                                                                       |                                                      |                                                                                              |
| Date of Visit (months from initial diagnosis) | 13                                                                                    | 6                                                    | 11                                                                                           |
| KPS                                           | 90                                                                                    | 80                                                   | 80                                                                                           |
| Mini Mental Status Exam Score                 |                                                                                       |                                                      |                                                                                              |
| History of seizures since last visit          | No                                                                                    | No                                                   | No                                                                                           |
| Neurologic Deficit                            | Yes. Left eye difficulty.                                                             | No. Expressive aphasia.                              | No                                                                                           |
| Symptoms Notes                                | n/a. MRI followup.                                                                    | Worsening of tumor, worsening weakness.              | No change in the enhancing nature of the lesion.                                             |
| <b>Visit 11</b>                               |                                                                                       |                                                      |                                                                                              |
| Date of Visit (months from initial diagnosis) | 15                                                                                    | 7                                                    | 12                                                                                           |
| KPS                                           | 90                                                                                    | 70                                                   | 80                                                                                           |
| Mini Mental Status Exam Score                 |                                                                                       |                                                      |                                                                                              |
| History of seizures since last visit          | No                                                                                    | No                                                   | No                                                                                           |

|                                               |                                                                                                                     |                                                           |                                                              |
|-----------------------------------------------|---------------------------------------------------------------------------------------------------------------------|-----------------------------------------------------------|--------------------------------------------------------------|
| Neurologic Deficit                            | Yes. Left eye difficulty.                                                                                           | No. Expressive aphasia.                                   | No                                                           |
| Symptoms Notes                                | n/a. MRI followup.                                                                                                  | Feels weak. Post Cyberknife followup.                     | Cognitive function has slowed slightly; progressive disease. |
| <b>Visit 12</b>                               |                                                                                                                     |                                                           |                                                              |
| Date of Visit (months from initial diagnosis) | 17                                                                                                                  | 8                                                         | 14                                                           |
| KPS                                           | 80                                                                                                                  | 70                                                        | 80                                                           |
| Mini Mental Status Exam Score                 |                                                                                                                     |                                                           |                                                              |
| History of seizures since last visit          | No                                                                                                                  | No                                                        | No                                                           |
| Neurologic Deficit                            | Yes. Left eye difficulty.                                                                                           | No. Expressive aphasia.                                   | No                                                           |
| Symptoms Notes                                | Lower abdominal pain, perhaps chronic prostatitis. MRI followup.                                                    | Trouble with memory and communication. MRI scan followup. | Further clear increase in tumor size.                        |
| <b>Visit 13</b>                               |                                                                                                                     |                                                           |                                                              |
| Date of Visit (months from initial diagnosis) | 19                                                                                                                  | 9                                                         | 15                                                           |
| KPS                                           | 80                                                                                                                  | 60                                                        | 70                                                           |
| Mini Mental Status Exam Score                 |                                                                                                                     |                                                           |                                                              |
| History of seizures since last visit          | No                                                                                                                  | No                                                        | No                                                           |
| Neurologic Deficit                            | Yes. Left eye difficulty.                                                                                           | No. Expressive aphasia.                                   | No                                                           |
| Symptoms Notes                                | Graying over of his vision especially under fluorescent lighting, perhaps ocular seizures. Neuro-oncology followup. | n/a. MRI followup.                                        | Clinical deterioration, GI toxicity from the VP-16.          |
| <b>Visit 14</b>                               |                                                                                                                     |                                                           |                                                              |
| Date of Visit (months from initial diagnosis) | 25                                                                                                                  | 10                                                        |                                                              |
| KPS                                           | 90                                                                                                                  | 50                                                        |                                                              |
| Mini Mental Status Exam Score                 |                                                                                                                     |                                                           |                                                              |
| History of seizures since last visit          | No                                                                                                                  | Yes                                                       |                                                              |

|                                               |                                                                                                                                                                                                                                                                                                                                                     |                                                                                   |  |
|-----------------------------------------------|-----------------------------------------------------------------------------------------------------------------------------------------------------------------------------------------------------------------------------------------------------------------------------------------------------------------------------------------------------|-----------------------------------------------------------------------------------|--|
| Neurologic Deficit                            | No                                                                                                                                                                                                                                                                                                                                                  | Yes. Left. Expressive aphasia, left sided weakness.                               |  |
| Symptoms Notes                                | Right parietal glioblastoma (MGMT methylated), status post gross total resection, placement of a VP shunt, and completion of chemoradiation and 12 cycles of adjuvant temozolomide, dose reduced for myelosuppression. Clinically he is doing well on observation since a year ago and radiographically there is no evidence for recurrent disease. | Rapidly worsening neurological symptoms with worsening weakness on the left side. |  |
| <b>Visit 15</b>                               |                                                                                                                                                                                                                                                                                                                                                     |                                                                                   |  |
| Date of Visit (months from initial diagnosis) | 27                                                                                                                                                                                                                                                                                                                                                  |                                                                                   |  |
| KPS                                           | 90                                                                                                                                                                                                                                                                                                                                                  |                                                                                   |  |
| Mini Mental Status Exam Score                 |                                                                                                                                                                                                                                                                                                                                                     |                                                                                   |  |
| History of seizures since last visit          | No                                                                                                                                                                                                                                                                                                                                                  |                                                                                   |  |
| Neurologic Deficit                            | No                                                                                                                                                                                                                                                                                                                                                  |                                                                                   |  |
| Symptoms Notes                                | Clinically he is doing well on observation since a year ago, and radiographically there is no evidence for recurrent disease.                                                                                                                                                                                                                       |                                                                                   |  |
| <b>Visit 16</b>                               |                                                                                                                                                                                                                                                                                                                                                     |                                                                                   |  |
| Date of Visit (months from initial diagnosis) | 29                                                                                                                                                                                                                                                                                                                                                  |                                                                                   |  |
| KPS                                           | 90                                                                                                                                                                                                                                                                                                                                                  |                                                                                   |  |
| Mini Mental Status Exam Score                 |                                                                                                                                                                                                                                                                                                                                                     |                                                                                   |  |
| History of seizures since last visit          | Yes                                                                                                                                                                                                                                                                                                                                                 |                                                                                   |  |

|                                               |                                                                                                                                                                                                                                                                                                                                                                     |  |  |
|-----------------------------------------------|---------------------------------------------------------------------------------------------------------------------------------------------------------------------------------------------------------------------------------------------------------------------------------------------------------------------------------------------------------------------|--|--|
| Neurologic Deficit                            | Yes. Left. History of intermittent visual field impairment.                                                                                                                                                                                                                                                                                                         |  |  |
| Symptoms Notes                                | He states that he is doing well without significant deficit nor new or progressive symptoms. Clinically he has a stable left visual field deficit. He remains active walking 4 miles a day. He continues on a regimen of herbal supplementation including mushrooms. Denies headache, numbness, weakness, gait impairment.                                          |  |  |
| <b>Visit 17</b>                               |                                                                                                                                                                                                                                                                                                                                                                     |  |  |
| Date of Visit (months from initial diagnosis) | 32                                                                                                                                                                                                                                                                                                                                                                  |  |  |
| KPS                                           | 90                                                                                                                                                                                                                                                                                                                                                                  |  |  |
| Mini Mental Status Exam Score                 |                                                                                                                                                                                                                                                                                                                                                                     |  |  |
| History of seizures since last visit          | No                                                                                                                                                                                                                                                                                                                                                                  |  |  |
| Neurologic Deficit                            | No                                                                                                                                                                                                                                                                                                                                                                  |  |  |
| Symptoms Notes                                | He is doing well without significant deficit nor new or progressive symptoms. He has not had any recurrent seizures since restarting Keppra 1000 mg BID. His previous history of intermittent visual field impairment have decreased significantly, his last visual aura according approximately 2 weeks ago. Clinically he has a stable left visual field deficit. |  |  |

|                                               |                                                                                                                                                                                                                                                                                                                                                               |  |  |
|-----------------------------------------------|---------------------------------------------------------------------------------------------------------------------------------------------------------------------------------------------------------------------------------------------------------------------------------------------------------------------------------------------------------------|--|--|
| <b>Visit 18</b>                               |                                                                                                                                                                                                                                                                                                                                                               |  |  |
| Date of Visit (months from initial diagnosis) | 34                                                                                                                                                                                                                                                                                                                                                            |  |  |
| KPS                                           | 90                                                                                                                                                                                                                                                                                                                                                            |  |  |
| Mini Mental Status Exam Score                 |                                                                                                                                                                                                                                                                                                                                                               |  |  |
| History of seizures since last visit          | No                                                                                                                                                                                                                                                                                                                                                            |  |  |
| Neurologic Deficit                            | No                                                                                                                                                                                                                                                                                                                                                            |  |  |
| Symptoms Notes                                | <p>He is accompanied by his wife and states that he is doing well without significant deficit nor new symptoms. His wife has noted some slowly progressive confusion and memory difficulty. Also reports persistent, moderately bothersome fatigue for which he naps frequently throughout the day. Denies headache, numbness, weakness, gait impairment.</p> |  |  |
| <b>Visit 19</b>                               |                                                                                                                                                                                                                                                                                                                                                               |  |  |
| Date of Visit (months from initial diagnosis) | 37                                                                                                                                                                                                                                                                                                                                                            |  |  |
| KPS                                           | 90                                                                                                                                                                                                                                                                                                                                                            |  |  |
| Mini Mental Status Exam Score                 |                                                                                                                                                                                                                                                                                                                                                               |  |  |
| History of seizures since last visit          | No                                                                                                                                                                                                                                                                                                                                                            |  |  |
| Neurologic Deficit                            | No                                                                                                                                                                                                                                                                                                                                                            |  |  |

|                                               |                                                                                                                                                                                                                                                                                                                |  |  |
|-----------------------------------------------|----------------------------------------------------------------------------------------------------------------------------------------------------------------------------------------------------------------------------------------------------------------------------------------------------------------|--|--|
| Symptoms Notes                                | States that he is doing well without significant deficit nor new symptoms. Also reports persistent, moderately bothersome fatigue for which he naps frequently. Clinically, he has a stable left visual field deficit. He remains active walking daily. Reports some increasing left lower extremity weakness. |  |  |
| <b>Visit 20</b>                               |                                                                                                                                                                                                                                                                                                                |  |  |
| Date of Visit (months from initial diagnosis) | 40                                                                                                                                                                                                                                                                                                             |  |  |
| KPS                                           | 90                                                                                                                                                                                                                                                                                                             |  |  |
| Mini Mental Status Exam Score                 |                                                                                                                                                                                                                                                                                                                |  |  |
| History of seizures since last visit          | No                                                                                                                                                                                                                                                                                                             |  |  |
| Neurologic Deficit                            | No                                                                                                                                                                                                                                                                                                             |  |  |
| Symptoms Notes                                | He is doing well without significant deficit nor new symptoms.                                                                                                                                                                                                                                                 |  |  |
| <b>Visit 21</b>                               |                                                                                                                                                                                                                                                                                                                |  |  |
| Date of Visit (months from initial diagnosis) | 43                                                                                                                                                                                                                                                                                                             |  |  |
| KPS                                           | 90                                                                                                                                                                                                                                                                                                             |  |  |
| Mini Mental Status Exam Score                 |                                                                                                                                                                                                                                                                                                                |  |  |
| History of seizures since last visit          | No                                                                                                                                                                                                                                                                                                             |  |  |
| Neurologic Deficit                            | No                                                                                                                                                                                                                                                                                                             |  |  |
| Symptoms Notes                                | Clinically, he is doing well without new or progressive symptoms. He continues on Keppra 1500 mg BID with few ocular visual auras.                                                                                                                                                                             |  |  |

|                                               |                  |    |    |
|-----------------------------------------------|------------------|----|----|
| <b>Visit 22</b>                               |                  |    |    |
| Date of Visit (months from initial diagnosis) | 47               |    |    |
| KPS                                           |                  |    |    |
| Mini Mental Status Exam Score                 |                  |    |    |
| History of seizures since last visit          | No               |    |    |
| Neurologic Deficit                            | No               |    |    |
| Symptoms Notes                                | Follow-up visit. |    |    |
| <b>Clinical Trials</b>                        |                  |    |    |
| 1                                             | //               | // | // |

| <b>Patient ID</b>                    | <b>W38-1-1</b>                                                                                                               | <b>W39-1-1</b>       | <b>W40-1-1</b>                                                                                          |
|--------------------------------------|------------------------------------------------------------------------------------------------------------------------------|----------------------|---------------------------------------------------------------------------------------------------------|
| <b>Patient Information</b>           |                                                                                                                              |                      |                                                                                                         |
| Gender                               | Female                                                                                                                       | Female               | Male                                                                                                    |
| Age at Initial Diagnosis             | 65                                                                                                                           | 68                   | 65                                                                                                      |
| Weight                               | 63.5 kg                                                                                                                      | 68.4 kg              | 110.7 kg                                                                                                |
| Height                               | 170.2 cm                                                                                                                     | 152.4 cm             | 172.7 cm                                                                                                |
| KPS                                  | 70 (?)                                                                                                                       | 60 (?)               | 100 (?)                                                                                                 |
| Mini Mental Status Exam Score        | 26                                                                                                                           | n/d                  | n/d                                                                                                     |
| History of Seizures Since Last Visit | Yes                                                                                                                          | No                   | No                                                                                                      |
| Neurologic Deficit                   | Yes. Left double simultaneous extinction.                                                                                    | Yes. Left.           | No                                                                                                      |
| Presentation Symptoms                | Left visual field hallucinations, difficulty with mental processing and with completing tasks, headaches, trouble with gait. | Left-sided weakness. | History of increasing confusion, difficulty with numbers/letters, telling time, and difficulty reading. |
| Time to Progression                  | 236 days                                                                                                                     | 97 days              | NA                                                                                                      |
| Overall Survival                     | 311 days                                                                                                                     | 880 days             | 184 days                                                                                                |
| Time to Last Follow-up               | NA                                                                                                                           | NA                   | NA                                                                                                      |
| Cause Of Death                       | Tumor progression                                                                                                            | Tumor progression    | Tumor progression                                                                                       |
| <b>Tumor Information</b>             |                                                                                                                              |                      |                                                                                                         |
| <b>Tumor 1</b>                       |                                                                                                                              |                      |                                                                                                         |

|                                       |                           |                                     |                           |
|---------------------------------------|---------------------------|-------------------------------------|---------------------------|
| Date (months from initial diagnosis)  | 0                         | 0                                   | 0                         |
| Diagnosis                             | Astrocytic tumor          | Astrocytic tumor                    | Astrocytic tumor          |
| Grade                                 | Glioblastoma WHO grade IV | Glioblastoma WHO grade IV           | Glioblastoma WHO grade IV |
| Location                              | Righ temporal             | Right Frontal                       | Left Parietal             |
| <b>Medications</b>                    |                           |                                     |                           |
| <b>Medication 1</b>                   |                           |                                     |                           |
| Category                              | Anti-epileptic            | Anti-epileptic                      | Steroids                  |
| Drug Name                             | Phenytoin                 | KEPPRA                              | Dexamethasone             |
| Start (months from initial diagnosis) | -1                        | 0                                   | 0                         |
| Total Daily Dosage                    |                           | 750 mg twice a day oral             | 4 mg 4 times a day oral   |
| End (months from initial diagnosis)   |                           | 6                                   | 0                         |
| <b>Medication 2</b>                   |                           |                                     |                           |
| Category                              | Anti-epileptic            | Cholesterol Lowering                | Anti-epileptic            |
| Drug Name                             | KEPPRA                    | Simvastatin                         | KEPPRA                    |
| Start (months from initial diagnosis) | -1                        | 0                                   | 0                         |
| Total Daily Dosage                    | 750 mg oral twice a day   | 80 mg at bedtime oral               | 1000 mg twice a day oral  |
| End (months from initial diagnosis)   | 0                         | 0                                   | 0                         |
| <b>Medication 3</b>                   |                           |                                     |                           |
| Category                              | Cholesterol lowering      | Steroids                            | Cardiotonic               |
| Drug Name                             | Simvastatin               | Dexamethasone                       | Warfarin                  |
| Start (months from initial diagnosis) | -1                        | 0                                   | 0                         |
| Total Daily Dosage                    | 10 mg oral daily          | 4mg/1mL injection 4mg 4 times a day | 5 mg daily oral           |
| End (months from initial diagnosis)   | 1                         | 0                                   | 0                         |
| <b>Medication 4</b>                   |                           |                                     |                           |
| Category                              | Anti-depressant           | Antihypertensive                    | Antihypertensive          |
| Drug Name                             | Citalopram (CELEXA)       | Lisinopril                          | diltiazem                 |
| Start (months from initial diagnosis) | 0                         | 0                                   | 0                         |
| Total Daily Dosage                    | 10 mg oral daily          | 20 mg daily oral                    | 120 mg daily oral         |
| End (months from initial diagnosis)   | 0                         | 4                                   | 0                         |
| <b>Medication 5</b>                   |                           |                                     |                           |
| Category                              | Steroids                  | Steroids                            | Steroids                  |
| Drug Name                             | Dexamethasone             | Dexamethasone                       | Dexamethasone             |
| Start (months from initial diagnosis) | 0                         | 0                                   | 0                         |



|                                       |                                             |                                                             |                                                         |
|---------------------------------------|---------------------------------------------|-------------------------------------------------------------|---------------------------------------------------------|
| Total Daily Dosage                    | 4mg/1mL injection 4mg 4 times a day         | 4 mg 4 times a day, 2 mg 4 times a day till 1 mg daily oral | 4mg/1mL injection 4mg 4 times a day, 3 times a day      |
| End (months from initial diagnosis)   | 0                                           | 1                                                           | 0                                                       |
| <b>Medication 6</b>                   |                                             |                                                             |                                                         |
| Category                              | Anti-epileptic                              | Cholesterol Lowering                                        | Anti-epileptic                                          |
| Drug Name                             | KEPPRA                                      | Simvastatin                                                 | KEPPRA                                                  |
| Start (months from initial diagnosis) | 0                                           | 0                                                           | 0                                                       |
| Total Daily Dosage                    | 750 mg in NS (0.9% NaCl) IV solution 100 mL | 40 mg at bedtime oral                                       | 1000 mg in NS(0.9% NaCl) IV solution 100 mg twice a day |
| End (months from initial diagnosis)   | 0                                           | 5                                                           | 0                                                       |
| <b>Medication 7</b>                   |                                             |                                                             |                                                         |
| Category                              | Steroids                                    | Multi-vitamin                                               | Antihypertensive                                        |
| Drug Name                             | Dexamethasone                               | THERA MULTI-VITAMIN                                         | Diltiazem                                               |
| Start (months from initial diagnosis) | 0                                           | 4                                                           | 0                                                       |
| Total Daily Dosage                    | 4mg/1mL injection 10mg 4 times              | 5 ml daily oral                                             | 30 mg 4 times a day oral                                |
| End (months from initial diagnosis)   | 0                                           | 4                                                           | 0                                                       |
| <b>Medication 8</b>                   |                                             |                                                             |                                                         |
| Category                              | Steroids                                    | Anti-epileptic                                              | Antihypertensive                                        |
| Drug Name                             | Dexamethasone                               | KEPPRA                                                      | Diltiazem                                               |
| Start (months from initial diagnosis) | 0                                           | 6                                                           | 0                                                       |
| Total Daily Dosage                    | 4mg/1mL injection 6mg 4 times               | 100mg/mL 750 mg oral solution                               | 120 mg QPM oral                                         |
| End (months from initial diagnosis)   | 0                                           | 23                                                          | 0                                                       |
| <b>Medication 9</b>                   |                                             |                                                             |                                                         |
| Category                              | Steroids                                    | Cholesterol Lowering                                        |                                                         |
| Drug Name                             | Dexamethasone                               | Simvastatin                                                 |                                                         |
| Start (months from initial diagnosis) | 0                                           | 9                                                           |                                                         |
| Total Daily Dosage                    | 4mg/1mL injection 4mg 4 times a day         | 40 mg at bedtime oral                                       |                                                         |
| End (months from initial diagnosis)   | 0                                           | 13                                                          |                                                         |
| <b>Medication 10</b>                  |                                             |                                                             |                                                         |
| Category                              | Steroids                                    | Anti-epileptic                                              |                                                         |
| Drug Name                             | Dexamethasone                               | KEPPRA                                                      |                                                         |
| Start (months from initial diagnosis) | 0                                           | 23                                                          |                                                         |

|                                       |                                                                                                                                           |                                                             |  |
|---------------------------------------|-------------------------------------------------------------------------------------------------------------------------------------------|-------------------------------------------------------------|--|
| Total Daily Dosage                    | 4mg/1mL injection 2mg 4 times a day                                                                                                       | 750 mg twice a day oral                                     |  |
| End (months from initial diagnosis)   | 0                                                                                                                                         | 24                                                          |  |
| <b>Medication 11</b>                  |                                                                                                                                           |                                                             |  |
| Category                              | Anti-epileptic                                                                                                                            | Anti-epileptic                                              |  |
| Drug Name                             | KEPPRA                                                                                                                                    | KEPPRA                                                      |  |
| Start (months from initial diagnosis) | 0                                                                                                                                         | 24                                                          |  |
| Total Daily Dosage                    | 750 mg oral twice a day                                                                                                                   | 1000-750 mg in NS(0.9% NaCl) IV solution 100 mg twice a day |  |
| End (months from initial diagnosis)   | 0                                                                                                                                         | 24                                                          |  |
| <b>Medication 12</b>                  |                                                                                                                                           |                                                             |  |
| Category                              | Anti-epileptic                                                                                                                            | Anti-epileptic                                              |  |
| Drug Name                             | Clonazepam (KLONOPIN)                                                                                                                     | KEPPRA                                                      |  |
| Start (months from initial diagnosis) | 0                                                                                                                                         | 24                                                          |  |
| Total Daily Dosage                    | 0.5 mg daily oral                                                                                                                         | 1500 mg twice a day oral                                    |  |
| End (months from initial diagnosis)   | 2                                                                                                                                         | 27                                                          |  |
| <b>Medication 13</b>                  |                                                                                                                                           |                                                             |  |
| Category                              | Anti-depressant                                                                                                                           | Anti-epileptic                                              |  |
| Drug Name                             | Citalopram (CELEXA)                                                                                                                       | KEPPRA                                                      |  |
| Start (months from initial diagnosis) | 0                                                                                                                                         | 27                                                          |  |
| Total Daily Dosage                    | 30 mg oral daily                                                                                                                          | 1500 mg in AM and 2000 mg in PM oral                        |  |
| End (months from initial diagnosis)   | 1                                                                                                                                         | 28                                                          |  |
| <b>Medication 14</b>                  |                                                                                                                                           |                                                             |  |
| Category                              | Steroids                                                                                                                                  |                                                             |  |
| Drug Name                             | Dexamethasone                                                                                                                             |                                                             |  |
| Start (months from initial diagnosis) | 6                                                                                                                                         |                                                             |  |
| Total Daily Dosage                    | 4mg by mouth twice on the day of treatment. Then taper to 2mg two times a day for one day, then 1mg two times a day for one day then 1 mg |                                                             |  |
| End (months from initial diagnosis)   | 8                                                                                                                                         |                                                             |  |
| <b>Surgery</b>                        |                                                                                                                                           |                                                             |  |
| <b>Surgery 1</b>                      |                                                                                                                                           |                                                             |  |

|                                                 |                           |                           |                             |
|-------------------------------------------------|---------------------------|---------------------------|-----------------------------|
| Date of Surgery (months from initial diagnosis) | 0                         | 0                         | 0                           |
| Gliadel                                         | No                        | No                        | No                          |
| Awake mapping                                   | No                        | No                        | No                          |
| Stealth scan                                    | Yes                       | Yes                       | Yes                         |
| <b>Tissue Diagnosis</b>                         |                           |                           |                             |
| <b>Tissue 1</b>                                 |                           |                           |                             |
| Serial Number                                   | W38-1-1, SN254            | SN257, W39-1-1            | W40-1-1, SN263              |
| Diagnosis                                       | Glioblastoma WHO grade IV | Glioblastoma WHO grade IV | Glioblastoma WHO grade IV   |
| Location                                        | Right Temporal            | Right Frontal             | Left Parietal               |
| Extent                                          | Subtotal resection 90%    | Subtotal resection 90%    | Complete resection          |
| MRI confirmation                                | Yes                       | Yes                       | Yes                         |
| Notes                                           | //                        | 95+% resection            | //                          |
| <b>Chemotherapy</b>                             |                           |                           |                             |
| <b>Medication 1</b>                             |                           |                           |                             |
| Drug Name                                       | Temozolomide              | Temozolomide              | Temozolomide                |
| Start (months from initial diagnosis)           | 1                         | 0                         | 1                           |
| Dosage                                          | 120mg                     | 120mg                     |                             |
| End (months from initial diagnosis)             | 2                         | 2                         | 2                           |
| Description                                     | Concurrent                | Concurrent                | daily oral during radiation |
| <b>Medication 2</b>                             |                           |                           |                             |
| Drug Name                                       | Temozolomide              | Temozolomide              |                             |
| Start (months from initial diagnosis)           | 4                         | 3                         |                             |
| Dosage                                          | 270mg                     | 240mg                     |                             |
| End (months from initial diagnosis)             | 5                         | 4                         |                             |
| Description                                     | maintenance 5 day cycle   | maintenance 5 day cycle   |                             |
| <b>Medication 3</b>                             |                           |                           |                             |
| Drug Name                                       | Temozolomide              | Temozolomide              |                             |
| Start (months from initial diagnosis)           | 5                         | 5                         |                             |
| Dosage                                          | 350mg                     | 220mg                     |                             |

|                                       |                         |                                               |            |
|---------------------------------------|-------------------------|-----------------------------------------------|------------|
| End (months from initial diagnosis)   | 8                       | 9                                             |            |
| Description                           | maintenance 5 day cycle | maintenance 5 day cycle                       |            |
| <b>Medication 4</b>                   |                         |                                               |            |
| Drug Name                             | Avastin                 | Temozolomide                                  |            |
| Start (months from initial diagnosis) | 8                       | 9                                             |            |
| Dosage                                |                         | 210mg                                         |            |
| End (months from initial diagnosis)   | 8                       | 11                                            |            |
| Description                           | maintenance             | maintenance 5 day cycle                       |            |
| <b>Medication 5</b>                   |                         |                                               |            |
| Drug Name                             | Temozolomide            | Avastin                                       |            |
| Start (months from initial diagnosis) | 8                       | 23                                            |            |
| Dosage                                | 75mg                    | 525 mg in NS(0.9% NaCl)<br>IV solution 100 mg |            |
| End (months from initial diagnosis)   | 8                       | 27                                            |            |
| Description                           | maintenance 7 day cycle | intravenous every 2 weeks                     |            |
| <b>Radiation Therapy</b>              |                         |                                               |            |
| <b>Medication 1</b>                   |                         |                                               |            |
| Type                                  | IMRT                    | IMRT                                          | IMRT       |
| Start (months from initial diagnosis) | 1                       | 0                                             | 1          |
| Dosage                                | 4600cGy                 | 4600cGy                                       | 4600cGy    |
| End (months from initial diagnosis)   | 2                       | 1                                             | 2          |
| Description                           | Concurrent              | Adjuvant Radiation                            | Concurrent |
| Fraction                              | 23                      | 23                                            | //         |
| <b>Medication 2</b>                   |                         |                                               |            |
| Type                                  | IMRT                    | IMRT                                          | IMRT       |
| Start (months from initial diagnosis) | 2                       | 1                                             | 2          |
| Dosage                                | 1400cGy                 | 1400cGy                                       | 1400cGy    |
| End (months from initial diagnosis)   | 2                       | 2                                             | 2          |
| Description                           | Boost                   | Boost                                         | Boost      |
| Fraction                              | 7                       | 7                                             | //         |
| <b>Medication 3</b>                   |                         |                                               |            |
| Type                                  | Stereotactic            |                                               |            |
| Start (months from initial diagnosis) | 6                       |                                               |            |
| Dosage                                | 7500cGy                 |                                               |            |

|                                                |                                                                                                                                        |                                                                           |                                                                                              |
|------------------------------------------------|----------------------------------------------------------------------------------------------------------------------------------------|---------------------------------------------------------------------------|----------------------------------------------------------------------------------------------|
| End (months from initial diagnosis)            | 6                                                                                                                                      |                                                                           |                                                                                              |
| Description                                    | Cyberknife                                                                                                                             |                                                                           |                                                                                              |
| Fraction                                       | 5                                                                                                                                      |                                                                           |                                                                                              |
| <b>Pathology</b>                               |                                                                                                                                        |                                                                           |                                                                                              |
| <b>Surgery 1</b>                               |                                                                                                                                        |                                                                           |                                                                                              |
| Date Of Report (months from initial diagnosis) | 0                                                                                                                                      | 0                                                                         | 0                                                                                            |
| <b>Report</b>                                  |                                                                                                                                        |                                                                           |                                                                                              |
| Location                                       | Tissue: W38-1-1, SN254                                                                                                                 | Tissue: SN257, W39-1-1                                                    | Tissue: W40-1-1, SN263                                                                       |
| Histopathology                                 | Glioblastoma, WHO grade IV/IV                                                                                                          | Glioblastoma                                                              | Glioblastoma                                                                                 |
| 1p19q_deletion                                 | Negative                                                                                                                               | Negative                                                                  | Negative                                                                                     |
| EGFR                                           | gain                                                                                                                                   | amplification                                                             | gain                                                                                         |
| PTEN                                           | Normal                                                                                                                                 | loss                                                                      | loss                                                                                         |
| MGMT PCR                                       | methylated                                                                                                                             | methylated                                                                | unmethylated                                                                                 |
| MGMT IHC                                       | negative                                                                                                                               | 25%                                                                       | 40%                                                                                          |
| MGMT MS-MLPA:R1                                | methylated (0.82)                                                                                                                      | unmethylated (0.24)                                                       | methylated (0.53)                                                                            |
| MGMT MS-MLPA:R2                                | methylated (0.79)                                                                                                                      | unmethylated (0.00)                                                       | unmethylated (0.10)                                                                          |
| MGMT MS-MLPA:R3                                | methylated (0.79)                                                                                                                      | methylated (0.57)                                                         | unmethylated (0.00)                                                                          |
| IDH1 mutation                                  | wildtype                                                                                                                               | wildtype                                                                  | wildtype                                                                                     |
| EGFR vIII                                      | not detected                                                                                                                           |                                                                           | not detected                                                                                 |
| <b>Follow-up Clinic Visit</b>                  |                                                                                                                                        |                                                                           |                                                                                              |
| <b>Visit 1</b>                                 |                                                                                                                                        |                                                                           |                                                                                              |
| Date of Visit (months from initial diagnosis)  | 0                                                                                                                                      | 0                                                                         | 2                                                                                            |
| KPS                                            | 80                                                                                                                                     | 90                                                                        | 30                                                                                           |
| Mini Mental Status Exam Score                  |                                                                                                                                        |                                                                           |                                                                                              |
| History of seizures since last visit           | No                                                                                                                                     | No                                                                        | No                                                                                           |
| Neurologic Deficit                             | Yes. Left/Right. Left hemiparesis.                                                                                                     | Yes. Left sided weakness.                                                 | No                                                                                           |
| Symptoms Notes                                 | Left hemiparesis and left neglect, ptosis on the right, facial movement decreased on the right. Comprehensive rehabilitation followup. | Left sided weakness continues, but somewhat improved. Radiation planning. | They have decided to hold all the medical treatments and go with hospice care. Hospice care. |

|                                               |                                 |                                                                                                                                                           |  |
|-----------------------------------------------|---------------------------------|-----------------------------------------------------------------------------------------------------------------------------------------------------------|--|
| <b>Visit 2</b>                                |                                 |                                                                                                                                                           |  |
| Date of Visit (months from initial diagnosis) | 3                               | 3                                                                                                                                                         |  |
| KPS                                           | 70                              | 90                                                                                                                                                        |  |
| Mini Mental Status Exam Score                 | 26                              |                                                                                                                                                           |  |
| History of seizures since last visit          | No                              | No                                                                                                                                                        |  |
| Neurologic Deficit                            | Yes. Left hemiparesis.          | Yes. Left sided weakness.                                                                                                                                 |  |
| Symptoms Notes                                | Left hemiparesis. MRI followup. | Area of abnormal contrast enhancement in MRI scan. Radiation completion.                                                                                  |  |
| <b>Visit 3</b>                                |                                 |                                                                                                                                                           |  |
| Date of Visit (months from initial diagnosis) | 3                               | 4                                                                                                                                                         |  |
| KPS                                           |                                 | 80                                                                                                                                                        |  |
| Mini Mental Status Exam Score                 | 28                              |                                                                                                                                                           |  |
| History of seizures since last visit          | No                              | No                                                                                                                                                        |  |
| Neurologic Deficit                            | Yes. Left sided weakness.       | Yes. Left sided weakness.                                                                                                                                 |  |
| Symptoms Notes                                | DC Vax protocol, 1st injection. | Pneumonia, fairly significant mucositis. Delay Temodar for one month. Stable focus of abnormal contrast consistent with pseudo-progression. MRI followup. |  |
| <b>Visit 4</b>                                |                                 |                                                                                                                                                           |  |
| Date of Visit (months from initial diagnosis) | 4                               | 5                                                                                                                                                         |  |
| KPS                                           | 80                              | 80                                                                                                                                                        |  |
| Mini Mental Status Exam Score                 |                                 |                                                                                                                                                           |  |
| History of seizures since last visit          | No                              | No                                                                                                                                                        |  |
| Neurologic Deficit                            | Yes. Left sided weakness.       | Yes. Left sided weakness.                                                                                                                                 |  |
| Symptoms Notes                                | 3rd DC Vax injection.           | Cough worsened, developed bronchitis. Temodar cycle 2 delayed.                                                                                            |  |

|                                               |                                                                                           |                                                                                                 |  |
|-----------------------------------------------|-------------------------------------------------------------------------------------------|-------------------------------------------------------------------------------------------------|--|
| <b>Visit 5</b>                                |                                                                                           |                                                                                                 |  |
| Date of Visit (months from initial diagnosis) | 5                                                                                         | 5                                                                                               |  |
| KPS                                           | 70                                                                                        | 80                                                                                              |  |
| Mini Mental Status Exam Score                 |                                                                                           |                                                                                                 |  |
| History of seizures since last visit          | No                                                                                        | No                                                                                              |  |
| Neurologic Deficit                            | Yes. Left/Right. Left weakness, right ptosis.                                             | Yes. Left sided weakness.                                                                       |  |
| Symptoms Notes                                | New imaging findings are concerning for progressive disease. MRI followup.                | Significant improvement in coughing. Restart Temodar.                                           |  |
| <b>Visit 6</b>                                |                                                                                           |                                                                                                 |  |
| Date of Visit (months from initial diagnosis) | 5                                                                                         | 8                                                                                               |  |
| KPS                                           | 70                                                                                        | 70                                                                                              |  |
| Mini Mental Status Exam Score                 |                                                                                           |                                                                                                 |  |
| History of seizures since last visit          | No                                                                                        | Yes                                                                                             |  |
| Neurologic Deficit                            | No. Left sided weakness.                                                                  | Yes. Left sided weakness.                                                                       |  |
| Symptoms Notes                                | 4th DC Vax injection.                                                                     | Seizure 2 months ago, another episode of shingles, upper left extremity affected. MRI followup. |  |
| <b>Visit 7</b>                                |                                                                                           |                                                                                                 |  |
| Date of Visit (months from initial diagnosis) | 7                                                                                         | 9                                                                                               |  |
| KPS                                           | 60                                                                                        | 70                                                                                              |  |
| Mini Mental Status Exam Score                 |                                                                                           |                                                                                                 |  |
| History of seizures since last visit          | No                                                                                        | Yes                                                                                             |  |
| Neurologic Deficit                            | Yes. Left. Decline of left motor function.                                                | Yes. Left sided weakness.                                                                       |  |
| Symptoms Notes                                | Early progression of disease while on the DCVax protocol, decline of left motor function. | Some left handed swelling, mild abulia. MRI followup.                                           |  |

|                                               |                                                               |                                                                                                    |  |
|-----------------------------------------------|---------------------------------------------------------------|----------------------------------------------------------------------------------------------------|--|
| <b>Visit 8</b>                                |                                                               |                                                                                                    |  |
| Date of Visit (months from initial diagnosis) | 8                                                             | 11                                                                                                 |  |
| KPS                                           | 70                                                            | 70                                                                                                 |  |
| Mini Mental Status Exam Score                 |                                                               |                                                                                                    |  |
| History of seizures since last visit          | No                                                            | No                                                                                                 |  |
| Neurologic Deficit                            | Yes. Left weakness.                                           | Yes. Left sided weakness.                                                                          |  |
| Symptoms Notes                                | 5th DC Vax injection.                                         | Marked restriction on left shoulder movement, pruritic rash develops after each dosage of temodar. |  |
| <b>Visit 9</b>                                |                                                               |                                                                                                    |  |
| Date of Visit (months from initial diagnosis) | 8                                                             | 13                                                                                                 |  |
| KPS                                           | 60                                                            | 80                                                                                                 |  |
| Mini Mental Status Exam Score                 |                                                               |                                                                                                    |  |
| History of seizures since last visit          | No                                                            | Yes                                                                                                |  |
| Neurologic Deficit                            | Yes. Left sided weakness.                                     | Yes. Left sided weakness.                                                                          |  |
| Symptoms Notes                                | Suffering further deterioration of function on her left side. | Slight improvement of rash, although temodar will be discontinued. Routine followup.               |  |
| <b>Visit 10</b>                               |                                                               |                                                                                                    |  |
| Date of Visit (months from initial diagnosis) | 8                                                             | 14                                                                                                 |  |
| KPS                                           | 50                                                            | 80                                                                                                 |  |
| Mini Mental Status Exam Score                 |                                                               |                                                                                                    |  |
| History of seizures since last visit          | No                                                            | No                                                                                                 |  |
| Neurologic Deficit                            | Yes. Left sided weakness.                                     | No                                                                                                 |  |
| Symptoms Notes                                | Tumors continues to worsen despite Avastin treatment.         | Patient is doing reasonably well from a clinical standpoint and the MRI scan shows stable disease. |  |



|                                               |  |                                                                                                                                                        |  |
|-----------------------------------------------|--|--------------------------------------------------------------------------------------------------------------------------------------------------------|--|
| <b>Visit 11</b>                               |  |                                                                                                                                                        |  |
| Date of Visit (months from initial diagnosis) |  | 16                                                                                                                                                     |  |
| KPS                                           |  | 70                                                                                                                                                     |  |
| Mini Mental Status Exam Score                 |  |                                                                                                                                                        |  |
| History of seizures since last visit          |  | No                                                                                                                                                     |  |
| Neurologic Deficit                            |  | Yes. Left sided weakness.                                                                                                                              |  |
| Symptoms Notes                                |  | Marked decline in motory status, more confusion.                                                                                                       |  |
| <b>Visit 12</b>                               |  |                                                                                                                                                        |  |
| Date of Visit (months from initial diagnosis) |  | 18                                                                                                                                                     |  |
| KPS                                           |  | 60                                                                                                                                                     |  |
| Mini Mental Status Exam Score                 |  |                                                                                                                                                        |  |
| History of seizures since last visit          |  | No                                                                                                                                                     |  |
| Neurologic Deficit                            |  | No                                                                                                                                                     |  |
| Symptoms Notes                                |  | Has returned to baseline since treating her UTI. Repeat UA pending today, but preliminarily appears okay.                                              |  |
| <b>Visit 13</b>                               |  |                                                                                                                                                        |  |
| Date of Visit (months from initial diagnosis) |  | 21                                                                                                                                                     |  |
| KPS                                           |  | 60                                                                                                                                                     |  |
| Mini Mental Status Exam Score                 |  |                                                                                                                                                        |  |
| History of seizures since last visit          |  | No                                                                                                                                                     |  |
| Neurologic Deficit                            |  | No                                                                                                                                                     |  |
| Symptoms Notes                                |  | Stable neurological status; and if anything she is getting better. While there is a suggestion of progression on the most recent scan, this is subtle. |  |

|                                               |  |                                                                                                                                                                                                             |  |
|-----------------------------------------------|--|-------------------------------------------------------------------------------------------------------------------------------------------------------------------------------------------------------------|--|
| <b>Visit 14</b>                               |  |                                                                                                                                                                                                             |  |
| Date of Visit (months from initial diagnosis) |  | 23                                                                                                                                                                                                          |  |
| KPS                                           |  | 50                                                                                                                                                                                                          |  |
| Mini Mental Status Exam Score                 |  |                                                                                                                                                                                                             |  |
| History of seizures since last visit          |  | No                                                                                                                                                                                                          |  |
| Neurologic Deficit                            |  | No                                                                                                                                                                                                          |  |
| Symptoms Notes                                |  | Her functional status is impaired and her mobility over the past year seems to have been in a decline.                                                                                                      |  |
| <b>Visit 15</b>                               |  |                                                                                                                                                                                                             |  |
| Date of Visit (months from initial diagnosis) |  | 25                                                                                                                                                                                                          |  |
| KPS                                           |  | 50                                                                                                                                                                                                          |  |
| Mini Mental Status Exam Score                 |  |                                                                                                                                                                                                             |  |
| History of seizures since last visit          |  | No                                                                                                                                                                                                          |  |
| Neurologic Deficit                            |  | No                                                                                                                                                                                                          |  |
| Symptoms Notes                                |  | Clinically, she has remained stable, with baseline limited mobility. She has not had any further seizures since her Keppra was increased to 1500 mg BID. Denies any new or progressive neurologic symptoms. |  |
| <b>Visit 16</b>                               |  |                                                                                                                                                                                                             |  |
| Date of Visit (months from initial diagnosis) |  | 27                                                                                                                                                                                                          |  |
| KPS                                           |  | 50                                                                                                                                                                                                          |  |
| Mini Mental Status Exam Score                 |  |                                                                                                                                                                                                             |  |
| History of seizures since last visit          |  | Yes                                                                                                                                                                                                         |  |
| Neurologic Deficit                            |  | No                                                                                                                                                                                                          |  |

|                        |       |                                                                                                             |    |
|------------------------|-------|-------------------------------------------------------------------------------------------------------------|----|
| Symptoms Notes         |       | Clinically, she has been declining with respect to her mobility, cognition and ability to care for herself. |    |
| <b>Clinical Trials</b> |       |                                                                                                             |    |
| 1                      | DCVax | //                                                                                                          | // |

| Patient ID                           | W42-1-1                                                                                        | W43-1-1                                                                                                            | W48-1-1                       |
|--------------------------------------|------------------------------------------------------------------------------------------------|--------------------------------------------------------------------------------------------------------------------|-------------------------------|
| <b>Patient Information</b>           |                                                                                                |                                                                                                                    |                               |
| Gender                               | Female                                                                                         | Female                                                                                                             | Male                          |
| Age at Initial Diagnosis             | 60                                                                                             | 62                                                                                                                 | 52                            |
| Weight                               | 89.994 kg                                                                                      | 76.749 kg                                                                                                          | 87.8 kg                       |
| Height                               | 172.45 cm                                                                                      | 163.56 cm                                                                                                          | 177.8 cm                      |
| KPS                                  | 70 (?)                                                                                         | 90 (?)                                                                                                             | 80 (?)                        |
| Mini Mental Status Exam Score        |                                                                                                | 28                                                                                                                 | 26                            |
| History of Seizures Since Last Visit | No                                                                                             | No                                                                                                                 | No                            |
| Neurologic Deficit                   | No                                                                                             | Yes. Left/Right. Speech difficulty.                                                                                | No                            |
| Presentation Symptoms                | One-month history of fainting spells, visual distortions, and tremor in right upper extremity. | Two-week history of headaches, cognitive and speech difficulty, nausea, vomiting, falls associated with dizziness. | History of headaches, nausea. |
| Time to Progression                  | NA                                                                                             | 133 days                                                                                                           | 92 days                       |
| Overall Survival                     | 197 days                                                                                       | 300 days                                                                                                           | 456 days                      |
| Time to Last Follow-up               | NA                                                                                             | NA                                                                                                                 | NA                            |
| Cause Of Death                       | Tumor progression                                                                              | Tumor progression                                                                                                  | Tumor progression             |
| <b>Tumor Information</b>             |                                                                                                |                                                                                                                    |                               |
| <b>Tumor 1</b>                       |                                                                                                |                                                                                                                    |                               |
| Date (months from initial diagnosis) | 0                                                                                              | 0                                                                                                                  | 0                             |
| Diagnosis                            | Astrocytic tumor                                                                               | Astrocytic tumor                                                                                                   | Astrocytic tumor              |
| Grade                                | Glioblastoma WHO grade IV                                                                      | Glioblastoma WHO grade IV                                                                                          | Glioblastoma WHO grade IV     |
| Location                             | Right Frontal-Temporal                                                                         | Right Temporal                                                                                                     | Right Parietal                |
| <b>Tumor 2</b>                       |                                                                                                |                                                                                                                    |                               |

|                                       |                                                         |                                                                                 |                                           |
|---------------------------------------|---------------------------------------------------------|---------------------------------------------------------------------------------|-------------------------------------------|
| Date (months from initial diagnosis)  |                                                         |                                                                                 | 7                                         |
| Diagnosis                             |                                                         |                                                                                 | Astrocytic tumor                          |
| Grade                                 |                                                         |                                                                                 | Glioblastoma WHO grade IV                 |
| Location                              |                                                         |                                                                                 | Right Temporal                            |
| <b>Medications</b>                    |                                                         |                                                                                 |                                           |
| <b>Medication 1</b>                   |                                                         |                                                                                 |                                           |
| Category                              | Steroids                                                | Multi-vitamin                                                                   | Steroids                                  |
| Drug Name                             | Dexamethasone                                           | ONE-A-DAY                                                                       | Dexamethasone                             |
| Start (months from initial diagnosis) | -1                                                      | 0                                                                               | -1                                        |
| Total Daily Dosage                    | 4mg/mL intravenous 4 mg 4 times a day                   | 1 cap daily oral                                                                | 4mg/1mL injection 4mg 4 times a day       |
| End (months from initial diagnosis)   | -1                                                      | 0                                                                               | -1                                        |
| <b>Medication 2</b>                   |                                                         |                                                                                 |                                           |
| Category                              | Anti-epileptic                                          | Steroids                                                                        | Anti-epileptic                            |
| Drug Name                             | KEPPRA                                                  | Dexamethasone                                                                   | KEPPRA                                    |
| Start (months from initial diagnosis) | -1                                                      | 0                                                                               | -1                                        |
| Total Daily Dosage                    | 1000 mg in NS(0.9% NaCl) IV solution 100 mL twice a day | 6 mg 4 times a day, 4 mg 4 times a day, 3 mg 4 times a day till 1 mg daily oral | 750 mg in NS(0.9% NaCl) IV solution 100 m |
| End (months from initial diagnosis)   | -1                                                      | 1                                                                               | -1                                        |
| <b>Medication 3</b>                   |                                                         |                                                                                 |                                           |
| Category                              | Steroids                                                | Anti-epileptic                                                                  | Anti-epileptic                            |
| Drug Name                             | Dexamethasone                                           | KEPPRA                                                                          | KEPPRA                                    |
| Start (months from initial diagnosis) | -1                                                      | 0                                                                               | -1                                        |
| Total Daily Dosage                    | 4 mg twice a day oral                                   | 1000 mg twice a day oral                                                        | 1000 mg twice a day oral                  |
| End (months from initial diagnosis)   | 0                                                       | 0                                                                               | 0                                         |
| <b>Medication 4</b>                   |                                                         |                                                                                 |                                           |
| Category                              | Anti-epileptic                                          | Anti-epileptic                                                                  | Steroids                                  |
| Drug Name                             | KEPPRA                                                  | KEPPRA                                                                          | Dexamethasone                             |
| Start (months from initial diagnosis) | -1                                                      | 0                                                                               | -1                                        |
| Total Daily Dosage                    | 1000 mg twice a day oral                                | 1000 mg in NS(0.9% NaCl) IV solution 100 mg twice a day                         | 4 mg oral 4-3 times a day oral            |
| End (months from initial diagnosis)   | 0                                                       | 0                                                                               | 0                                         |
| <b>Medication 5</b>                   |                                                         |                                                                                 |                                           |
| Category                              |                                                         | Anti-epileptic                                                                  | Steroids                                  |

|                                       |  |                          |                                         |
|---------------------------------------|--|--------------------------|-----------------------------------------|
| Drug Name                             |  | KEPPRA                   | Dexamethasone                           |
| Start (months from initial diagnosis) |  | 0                        | 0                                       |
| Total Daily Dosage                    |  | 1000 mg twice a day oral | 1 mg 4 times a day oral                 |
| End (months from initial diagnosis)   |  | 7                        | 0                                       |
| <b>Medication 6</b>                   |  |                          |                                         |
| Category                              |  | Steroids                 | Steroids                                |
| Drug Name                             |  | Dexamethasone            | Dexamethasone                           |
| Start (months from initial diagnosis) |  | 5                        | 0                                       |
| Total Daily Dosage                    |  | 4 mg once oral           | 2-1 mg 3-2-1 times a day oral           |
| End (months from initial diagnosis)   |  | //                       | 0                                       |
| <b>Medication 7</b>                   |  |                          |                                         |
| Category                              |  | Steroids                 | Anti-epileptic                          |
| Drug Name                             |  | Dexamethasone            | KEPPRA XR                               |
| Start (months from initial diagnosis) |  | 7                        | 0                                       |
| Total Daily Dosage                    |  | 1 mg twice a day oral    | 1000 mg twice a day oral                |
| End (months from initial diagnosis)   |  | 8                        | 3                                       |
| <b>Medication 8</b>                   |  |                          |                                         |
| Category                              |  |                          | Steroids                                |
| Drug Name                             |  |                          | Dexamethasone                           |
| Start (months from initial diagnosis) |  |                          | 7                                       |
| Total Daily Dosage                    |  |                          | 2 mg 3 times a day oral                 |
| End (months from initial diagnosis)   |  |                          | 7                                       |
| <b>Medication 9</b>                   |  |                          |                                         |
| Category                              |  |                          | Anti-epileptic                          |
| Drug Name                             |  |                          | KEPPRA                                  |
| Start (months from initial diagnosis) |  |                          | 7                                       |
| Total Daily Dosage                    |  |                          | 1000 mg twice a day oral                |
| End (months from initial diagnosis)   |  |                          | 8                                       |
| <b>Medication 10</b>                  |  |                          |                                         |
| Category                              |  |                          | Steroids                                |
| Drug Name                             |  |                          | Dexamethasone                           |
| Start (months from initial diagnosis) |  |                          | 7                                       |
| Total Daily Dosage                    |  |                          | 4mg/1mL injection 2-4mg 3-4 times a day |
| End (months from initial diagnosis)   |  |                          | 7                                       |

|                                                 |     |     |                                                 |
|-------------------------------------------------|-----|-----|-------------------------------------------------|
| <b>Medication 11</b>                            |     |     |                                                 |
| Category                                        |     |     | Steroids                                        |
| Drug Name                                       |     |     | Dexamethasone                                   |
| Start (months from initial diagnosis)           |     |     | 7                                               |
| Total Daily Dosage                              |     |     | from 4 mg 3 times a day till<br>1 mg daily oral |
| End (months from initial diagnosis)             |     |     | 8                                               |
| <b>Medication 12</b>                            |     |     |                                                 |
| Category                                        |     |     | Steroids                                        |
| Drug Name                                       |     |     | Dexamethasone                                   |
| Start (months from initial diagnosis)           |     |     | 14                                              |
| Total Daily Dosage                              |     |     | 8mg twice a day oral                            |
| End (months from initial diagnosis)             |     |     | 15                                              |
| <b>Medication 13</b>                            |     |     |                                                 |
| Category                                        |     |     | Antihypertensive                                |
| Drug Name                                       |     |     | Lisinopril                                      |
| Start (months from initial diagnosis)           |     |     | 14                                              |
| Total Daily Dosage                              |     |     | 20 mg daily oral                                |
| End (months from initial diagnosis)             |     |     | 15                                              |
| <b>Medication 14</b>                            |     |     |                                                 |
| Category                                        |     |     | Anti-epileptic                                  |
| Drug Name                                       |     |     | KEPPRA                                          |
| Start (months from initial diagnosis)           |     |     | 14                                              |
| Total Daily Dosage                              |     |     | 500 mg twice a day oral                         |
| End (months from initial diagnosis)             |     |     | 15                                              |
| <b>Surgery</b>                                  |     |     |                                                 |
| <b>Surgery 1</b>                                |     |     |                                                 |
| Date of Surgery (months from initial diagnosis) | 0   | 0   | 0                                               |
| Gliadel                                         | No  | No  | No                                              |
| Awake mapping                                   | No  | No  | No                                              |
| Stealth scan                                    | Yes | Yes | Yes                                             |
| <b>Surgery 2</b>                                |     |     |                                                 |
| Date of Surgery (months from initial diagnosis) |     |     | 7                                               |
| Gliadel                                         |     |     | No                                              |

|                                       |                                                 |                                                                |                                                   |
|---------------------------------------|-------------------------------------------------|----------------------------------------------------------------|---------------------------------------------------|
| Awake mapping                         |                                                 |                                                                | No                                                |
| Stealth scan                          |                                                 |                                                                | Yes                                               |
| <b>Tissue Diagnosis</b>               |                                                 |                                                                |                                                   |
| <b>Tissue 1</b>                       |                                                 |                                                                |                                                   |
| Serial Number                         | W42-1-1, SN285                                  | W43-1-1, SN286                                                 | SN309, W48-1-1                                    |
| Diagnosis                             | Glioblastoma WHO grade IV                       | Glioblastoma WHO grade IV                                      | Glioblastoma WHO grade IV                         |
| Location                              | Right Frontal-Temporal                          | Right Temporal                                                 | Right Parietal                                    |
| Extent                                | Complete resection                              | Complete resection                                             | Complete resection                                |
| MRI confirmation                      | No                                              | Yes                                                            | Yes                                               |
| Notes                                 | Concerning for a small amount of residual tumor | No abnormal enhancement demonstrated to suggest residual tumor | Apparent gross total resection, no residual tumor |
| <b>Tissue 2</b>                       |                                                 |                                                                |                                                   |
| Serial Number                         |                                                 |                                                                | SN332, W48-2-1                                    |
| Diagnosis                             |                                                 |                                                                | Glioblastoma WHO grade IV                         |
| Location                              |                                                 |                                                                | Right Temporal                                    |
| Extent                                |                                                 |                                                                | Complete resection                                |
| MRI confirmation                      |                                                 |                                                                | Yes                                               |
| Notes                                 |                                                 |                                                                | //                                                |
| <b>Chemotherapy</b>                   |                                                 |                                                                |                                                   |
| <b>Medication 1</b>                   |                                                 |                                                                |                                                   |
| Drug Name                             | Temozolomide                                    | Temozolomide                                                   | Temozolomide                                      |
| Start (months from initial diagnosis) | 1                                               | 0                                                              | 1                                                 |
| Dosage                                | 150mg                                           | 140mg                                                          | 145mg                                             |
| End (months from initial diagnosis)   | 2                                               | 2                                                              | 2                                                 |
| Description                           | Concurrent                                      | concurrent                                                     | concurrent                                        |
| <b>Medication 2</b>                   |                                                 |                                                                |                                                   |
| Drug Name                             | Temozolomide                                    | Temozolomide                                                   | Temozolomide                                      |
| Start (months from initial diagnosis) | 3                                               | 2                                                              | 4                                                 |
| Dosage                                | 100mg                                           | 280mg                                                          | 290mg                                             |
| End (months from initial diagnosis)   |                                                 | 5                                                              | 4                                                 |

|                                       |                       |                           |                                               |
|---------------------------------------|-----------------------|---------------------------|-----------------------------------------------|
| Description                           | maintenance 5d cycles | maintenance 5 day cycle   | daily oral                                    |
| <b>Medication 3</b>                   |                       |                           |                                               |
| Drug Name                             |                       | Temozolomide              | Temozolomide                                  |
| Start (months from initial diagnosis) |                       | 5                         | 5                                             |
| Dosage                                |                       | 140mg                     | 400mg                                         |
| End (months from initial diagnosis)   |                       | 7                         | 7                                             |
| Description                           |                       | maintenance 21 day cycle  | daily oral                                    |
| <b>Medication 4</b>                   |                       |                           |                                               |
| Drug Name                             |                       | Avastin                   | Temozolomide                                  |
| Start (months from initial diagnosis) |                       | 7                         | 8                                             |
| Dosage                                |                       | //                        | 195mg                                         |
| End (months from initial diagnosis)   |                       | 8                         | 9                                             |
| Description                           |                       | intravenous every 2 weeks | daily oral                                    |
| <b>Medication 5</b>                   |                       |                           |                                               |
| Drug Name                             |                       |                           | Avastin                                       |
| Start (months from initial diagnosis) |                       |                           | 9                                             |
| Dosage                                |                       |                           | 753 mg in NS(0.9% NaCl)<br>IV solution 100 mL |
| End (months from initial diagnosis)   |                       |                           | 14                                            |
| Description                           |                       |                           | every 2 weeks                                 |
| <b>Medication 6</b>                   |                       |                           |                                               |
| Drug Name                             |                       |                           | Etoposide                                     |
| Start (months from initial diagnosis) |                       |                           | 12                                            |
| Dosage                                |                       |                           | 50mg                                          |
| End (months from initial diagnosis)   |                       |                           | 12                                            |
| Description                           |                       |                           | daily oral                                    |
| <b>Medication 7</b>                   |                       |                           |                                               |
| Drug Name                             |                       |                           | Etoposide                                     |
| Start (months from initial diagnosis) |                       |                           | 13                                            |
| Dosage                                |                       |                           | 100mg                                         |
| End (months from initial diagnosis)   |                       |                           | 14                                            |
| Description                           |                       |                           | daily oral                                    |
| <b>Radiation Therapy</b>              |                       |                           |                                               |



|                                                |                        |                        |                                                                                   |
|------------------------------------------------|------------------------|------------------------|-----------------------------------------------------------------------------------|
| <b>Medication 1</b>                            |                        |                        |                                                                                   |
| Type                                           | //                     | //                     | IMRT                                                                              |
| Start (months from initial diagnosis)          | 1                      | 0                      | 1                                                                                 |
| Dosage                                         | //                     | 6300cGy                | 6000cGy                                                                           |
| End (months from initial diagnosis)            | 2                      | 2                      | 2                                                                                 |
| Description                                    | //                     | //                     | The right parietal occipital tumor bed, was treated with a 5 field IMRT technique |
| Fraction                                       | //                     | //                     | 30                                                                                |
| <b>Medication 2</b>                            |                        |                        |                                                                                   |
| Type                                           |                        | Stereotactic           |                                                                                   |
| Start (months from initial diagnosis)          |                        | 7                      |                                                                                   |
| Dosage                                         |                        | 2400cGy                |                                                                                   |
| End (months from initial diagnosis)            |                        | 7                      |                                                                                   |
| Description                                    |                        | Cyberknife/Adjuvant    |                                                                                   |
| Fraction                                       |                        | 3                      |                                                                                   |
| <b>Pathology</b>                               |                        |                        |                                                                                   |
| <b>Surgery 1</b>                               |                        |                        |                                                                                   |
| Date Of Report (months from initial diagnosis) | 0                      | 0                      | 0                                                                                 |
| <b>Report</b>                                  |                        |                        |                                                                                   |
| Location                                       | Tissue: W42-1-1, SN285 | Tissue: W43-1-1, SN286 | Tissue: SN309, W48-1-1                                                            |
| Histopathology                                 | Glioblastoma           | Glioblastoma           | Glioblastoma                                                                      |
| 1p19q_deletion                                 |                        |                        |                                                                                   |
| EGFR                                           |                        |                        |                                                                                   |
| PTEN                                           |                        |                        |                                                                                   |
| MGMT PCR                                       |                        |                        |                                                                                   |
| MGMT IHC                                       |                        |                        |                                                                                   |
| MGMT MS-MLPA:R1                                | methylated (0.36)      | methylated (0.51)      | unmethylated (0.26)                                                               |
| MGMT MS-MLPA:R2                                | unmethylated (0.24)    | unmethylated (0.06)    | unmethylated (0.09)                                                               |
| MGMT MS-MLPA:R3                                | methylated (0.47)      | unmethylated (0.01)    | unmethylated (0.05)                                                               |
| IDH1 mutation                                  | wildtype               | wildtype               | R132G                                                                             |
| EGFR vIII                                      | detected               |                        | not detected                                                                      |

|                                                   |                 |                 |                                                                                                                            |
|---------------------------------------------------|-----------------|-----------------|----------------------------------------------------------------------------------------------------------------------------|
| <b>Surgery 2</b>                                  |                 |                 |                                                                                                                            |
| Date Of Report<br>(months from initial diagnosis) |                 |                 | 7                                                                                                                          |
| <b>Report</b>                                     |                 |                 |                                                                                                                            |
| Location                                          |                 |                 | Tissue: SN332, W48-2-1                                                                                                     |
| Histopathology                                    |                 |                 | Glioblastoma                                                                                                               |
| 1p19q_deletion                                    |                 |                 |                                                                                                                            |
| EGFR                                              |                 |                 |                                                                                                                            |
| PTEN                                              |                 |                 |                                                                                                                            |
| MGMT PCR                                          |                 |                 |                                                                                                                            |
| MGMT IHC                                          |                 |                 |                                                                                                                            |
| MGMT MS-MLPA:R1                                   |                 |                 | methyated (0.37)                                                                                                           |
| MGMT MS-MLPA:R2                                   |                 |                 | unmethyated (0.05)                                                                                                         |
| MGMT MS-MLPA:R3                                   |                 |                 | unmethyated (0.03)                                                                                                         |
| IDH1 mutation                                     |                 |                 | wildtype                                                                                                                   |
| EGFR vIII                                         |                 |                 | not detected                                                                                                               |
| <b>Follow-up Clinic Visit</b>                     |                 |                 |                                                                                                                            |
| <b>Visit 1</b>                                    |                 |                 |                                                                                                                            |
| Date of Visit (months from initial diagnosis)     | 0               | 0               | 0                                                                                                                          |
| KPS                                               | 90              |                 |                                                                                                                            |
| Mini Mental Status Exam Score                     |                 |                 |                                                                                                                            |
| History of seizures since last visit              | No              | No              | No                                                                                                                         |
| Neurologic Deficit                                | No              | No              | Yes. Left hemianopsia.                                                                                                     |
| Symptoms Notes                                    | Suture removal. | Suture removal. | Left hemianopsia,<br>occasionally hears a<br>"squeaky" noise inside his<br>head near the incision site.<br>Suture removal. |
| <b>Visit 2</b>                                    |                 |                 |                                                                                                                            |
| Date of Visit (months from initial diagnosis)     | 0               | 0               | 0                                                                                                                          |
| KPS                                               | 80              |                 |                                                                                                                            |
| Mini Mental Status Exam Score                     |                 | 28              | 26                                                                                                                         |

|                                               |                                                                                                                                                 |                       |                                                                                                   |
|-----------------------------------------------|-------------------------------------------------------------------------------------------------------------------------------------------------|-----------------------|---------------------------------------------------------------------------------------------------|
| History of seizures since last visit          | Yes                                                                                                                                             | No                    | No                                                                                                |
| Neurologic Deficit                            | Yes. Right arm tremor.                                                                                                                          | No                    | Yes. Left hemianopsia.                                                                            |
| Symptoms Notes                                | Seizures, trembling of the hand and arms (right), headaches, dizziness, fainting, numbness, tingling, trouble with balance. Radiation planning. | Radiation planning.   | Radiation planning.                                                                               |
| <b>Visit 3</b>                                |                                                                                                                                                 |                       |                                                                                                   |
| Date of Visit (months from initial diagnosis) | 1                                                                                                                                               | 1                     | 0                                                                                                 |
| KPS                                           | 80                                                                                                                                              | 90                    | 90                                                                                                |
| Mini Mental Status Exam Score                 |                                                                                                                                                 |                       |                                                                                                   |
| History of seizures since last visit          | Yes                                                                                                                                             | No                    | No                                                                                                |
| Neurologic Deficit                            | Yes. Right arm tremor.                                                                                                                          | No                    | Yes. Left hemianopsia.                                                                            |
| Symptoms Notes                                | Radiation evaluation.                                                                                                                           | Mid radiation visit.  | Left hemianopsia, very slight left lower extremity weakness. Radiation planning.                  |
| <b>Visit 4</b>                                |                                                                                                                                                 |                       |                                                                                                   |
| Date of Visit (months from initial diagnosis) | 3                                                                                                                                               | 2                     | 1                                                                                                 |
| KPS                                           | 70                                                                                                                                              | 90                    | 90                                                                                                |
| Mini Mental Status Exam Score                 |                                                                                                                                                 |                       |                                                                                                   |
| History of seizures since last visit          | No                                                                                                                                              | No                    | No                                                                                                |
| Neurologic Deficit                            | Yes. Right arm tremor.                                                                                                                          | No                    | Yes. Left hemianopsia.                                                                            |
| Symptoms Notes                                | Fatigue, right leg edema, right arm tremor. Post radiation.                                                                                     | Post radiation visit. | Occasional brief headaches. His left-sided visual problems have improved. Mid radiation followup. |
| <b>Visit 5</b>                                |                                                                                                                                                 |                       |                                                                                                   |
| Date of Visit (months from initial diagnosis) | 3                                                                                                                                               | 4                     | 3                                                                                                 |

|                                               |                                                                                                                                 |                                                                                                                                        |                                                                                         |
|-----------------------------------------------|---------------------------------------------------------------------------------------------------------------------------------|----------------------------------------------------------------------------------------------------------------------------------------|-----------------------------------------------------------------------------------------|
| KPS                                           | 60                                                                                                                              | 80                                                                                                                                     | 90                                                                                      |
| Mini Mental Status Exam Score                 |                                                                                                                                 |                                                                                                                                        |                                                                                         |
| History of seizures since last visit          | Yes                                                                                                                             | No                                                                                                                                     | No                                                                                      |
| Neurologic Deficit                            | Yes. Right arm tremor.                                                                                                          | No                                                                                                                                     | Yes. Left hemianopsia.                                                                  |
| Symptoms Notes                                | Fatigue, edema in right leg, headache, backache, nausea, vomiting. Symptoms concerning for progressive disease. TMZ evaluation. | Signs of tumor progression. MRI followup.                                                                                              | Patient discontinued keppra without being instructed to do so. Post radiation followup. |
| <b>Visit 6</b>                                |                                                                                                                                 |                                                                                                                                        |                                                                                         |
| Date of Visit (months from initial diagnosis) |                                                                                                                                 | 5                                                                                                                                      | 3                                                                                       |
| KPS                                           |                                                                                                                                 | 80                                                                                                                                     | 90                                                                                      |
| Mini Mental Status Exam Score                 |                                                                                                                                 |                                                                                                                                        |                                                                                         |
| History of seizures since last visit          |                                                                                                                                 | No                                                                                                                                     | No                                                                                      |
| Neurologic Deficit                            |                                                                                                                                 | No                                                                                                                                     | Yes. Left hemianopsia.                                                                  |
| Symptoms Notes                                |                                                                                                                                 | Increasing symptoms that reflect the worsening contrast enhancement. Switching from 5 day to 21 day Temodar regimen. Starting Avastin. | DC Vax protocol, 1st injection today.                                                   |
| <b>Visit 7</b>                                |                                                                                                                                 |                                                                                                                                        |                                                                                         |
| Date of Visit (months from initial diagnosis) |                                                                                                                                 | 7                                                                                                                                      | 3                                                                                       |
| KPS                                           |                                                                                                                                 | 90                                                                                                                                     | 90                                                                                      |
| Mini Mental Status Exam Score                 |                                                                                                                                 |                                                                                                                                        |                                                                                         |
| History of seizures since last visit          |                                                                                                                                 | Yes                                                                                                                                    | No                                                                                      |
| Neurologic Deficit                            |                                                                                                                                 | No                                                                                                                                     | No                                                                                      |
| Symptoms Notes                                |                                                                                                                                 | Drastic improvement of enhancement. 2 month followup.                                                                                  | No residual visual field cuts. Radiation Oncology followup.                             |

|                                               |  |                                                                                                         |                                                                                                 |
|-----------------------------------------------|--|---------------------------------------------------------------------------------------------------------|-------------------------------------------------------------------------------------------------|
| <b>Visit 8</b>                                |  |                                                                                                         |                                                                                                 |
| Date of Visit (months from initial diagnosis) |  | 8                                                                                                       | 9                                                                                               |
| KPS                                           |  | 70                                                                                                      | 90                                                                                              |
| Mini Mental Status Exam Score                 |  |                                                                                                         |                                                                                                 |
| History of seizures since last visit          |  | No                                                                                                      | No                                                                                              |
| Neurologic Deficit                            |  | No                                                                                                      | No                                                                                              |
| Symptoms Notes                                |  | Headaches, poor balance, numb feet, and drowsiness. Stopped Temodar after Cyberknife. 2 month followup. | Denies seizures, headache, cognitive changes, gait impairment.                                  |
| <b>Visit 9</b>                                |  |                                                                                                         |                                                                                                 |
| Date of Visit (months from initial diagnosis) |  |                                                                                                         | 10                                                                                              |
| KPS                                           |  |                                                                                                         | 90                                                                                              |
| Mini Mental Status Exam Score                 |  |                                                                                                         |                                                                                                 |
| History of seizures since last visit          |  |                                                                                                         | No                                                                                              |
| Neurologic Deficit                            |  |                                                                                                         | No                                                                                              |
| Symptoms Notes                                |  |                                                                                                         | Reports some memory loss, fatigue, depression, trouble sleeping, and anxiety.                   |
| <b>Visit 10</b>                               |  |                                                                                                         |                                                                                                 |
| Date of Visit (months from initial diagnosis) |  |                                                                                                         | 12                                                                                              |
| KPS                                           |  |                                                                                                         | 90                                                                                              |
| Mini Mental Status Exam Score                 |  |                                                                                                         |                                                                                                 |
| History of seizures since last visit          |  |                                                                                                         | No                                                                                              |
| Neurologic Deficit                            |  |                                                                                                         | No                                                                                              |
| Symptoms Notes                                |  |                                                                                                         | Returns today for surveillance scan and reports doing well without new or progressive symptoms. |

|                                               |    |    |                                                                                                                                                                                                                                       |
|-----------------------------------------------|----|----|---------------------------------------------------------------------------------------------------------------------------------------------------------------------------------------------------------------------------------------|
| <b>Visit 11</b>                               |    |    |                                                                                                                                                                                                                                       |
| Date of Visit (months from initial diagnosis) |    |    | 14                                                                                                                                                                                                                                    |
| KPS                                           |    |    | 70                                                                                                                                                                                                                                    |
| Mini Mental Status Exam Score                 |    |    |                                                                                                                                                                                                                                       |
| History of seizures since last visit          |    |    | No                                                                                                                                                                                                                                    |
| Neurologic Deficit                            |    |    | Yes. Left.                                                                                                                                                                                                                            |
| Symptoms Notes                                |    |    | Clinically, he continues to have a left hemiparesis which is modestly more apparent compared to a few weeks ago. He denies headaches and is able to ambulate independently with some unsteadiness. He denies any history of seizures. |
| <b>Clinical Trials</b>                        |    |    |                                                                                                                                                                                                                                       |
| 1                                             | // | // | DCVax - 1st injection in 3 months from initial diagnosis.                                                                                                                                                                             |

| <b>Patient ID</b>                    | <b>W53-1-1</b> | <b>W54-1-1</b> | <b>W55-1-1</b> |
|--------------------------------------|----------------|----------------|----------------|
| <b>Patient Information</b>           |                |                |                |
| Gender                               | Male           | Male           | Male           |
| Age at Initial Diagnosis             | 55             | 58             | 53             |
| Weight                               | 69.673 kg      | 154 kg         | 95 kg          |
| Height                               | 171.5 cm       | 178 cm         | 185 cm         |
| KPS                                  | 90 (?)         | 70 (?)         | 100 (?)        |
| Mini Mental Status Exam Score        |                |                |                |
| History of Seizures Since Last Visit | No             | Yes            | No             |
| Neurologic Deficit                   | No             | No             | No             |

|                                       |                                                   |                                                         |                                              |
|---------------------------------------|---------------------------------------------------|---------------------------------------------------------|----------------------------------------------|
| Presentation Symptoms                 | Three month history of word finding difficulties. | Three week history of headaches and expressive aphasia. | Mild headaches, memory loss.                 |
| Time to Progression                   | 312 days                                          | NA                                                      | NA                                           |
| Overall Survival                      | NA                                                | 62 days                                                 | NA                                           |
| Time to Last Follow-up                | 652 days                                          | NA                                                      | 2 days                                       |
| Cause Of Death                        | //                                                | Tumor progression                                       | //                                           |
| <b>Tumor Information</b>              |                                                   |                                                         |                                              |
| <b>Tumor 1</b>                        |                                                   |                                                         |                                              |
| Date (months from initial diagnosis)  | 0                                                 | 0                                                       | 0                                            |
| Diagnosis                             | Astrocytic tumor                                  | Astrocytic tumor                                        | Astrocytic tumor                             |
| Grade                                 | Glioblastoma WHO grade IV                         | Glioblastoma WHO grade IV                               | Glioblastoma WHO grade IV                    |
| Location                              | Left Temporal                                     | Left Temporal                                           | Right Temporal                               |
| <b>Medications</b>                    |                                                   |                                                         |                                              |
| <b>Medication 1</b>                   |                                                   |                                                         |                                              |
| Category                              | Anti-epileptic                                    | Steroids                                                | Steroids                                     |
| Drug Name                             | KEPPRA                                            | Dexamethasone                                           | Dexamethasone                                |
| Start (months from initial diagnosis) | 0                                                 | 0                                                       | 0                                            |
| Total Daily Dosage                    | 1000 mg twice a day oral                          | from 4 mg twice a day till 1 mg daily oral              | 4mg/1mL injection 4mg 4 times a day          |
| End (months from initial diagnosis)   | 1                                                 | 1                                                       | 0                                            |
| <b>Medication 2</b>                   |                                                   |                                                         |                                              |
| Category                              | Steroids                                          | Antihypertensive                                        | Steroids                                     |
| Drug Name                             | Dexamethasone                                     | Lisinopril                                              | Dexamethasone                                |
| Start (months from initial diagnosis) | 0                                                 | 0                                                       | 0                                            |
| Total Daily Dosage                    | 2 mg twice a day oral                             | 10 mg daily oral                                        | 4 mg 4 times a day oral                      |
| End (months from initial diagnosis)   | 1                                                 | 1                                                       | 0                                            |
| <b>Medication 3</b>                   |                                                   |                                                         |                                              |
| Category                              | Anti-epileptic                                    | Anti-depressant                                         | Steroids                                     |
| Drug Name                             | KEPPRA                                            | Quetiapine                                              | Dexamethasone                                |
| Start (months from initial diagnosis) | 1                                                 | 0                                                       | 0                                            |
| Total Daily Dosage                    | 500 mg twice a day oral                           | 50 mg twice a day oral                                  | from 3 mg 3 times a day till 2 mg daily oral |
| End (months from initial diagnosis)   | 3                                                 | 1                                                       | 0                                            |

|                                                 |                           |                           |                           |
|-------------------------------------------------|---------------------------|---------------------------|---------------------------|
| <b>Medication 4</b>                             |                           |                           |                           |
| Category                                        | Anti-epileptic            | Antihypertensive          |                           |
| Drug Name                                       | KEPPRA                    | Lisinopril                |                           |
| Start (months from initial diagnosis)           | 14                        | 1                         |                           |
| Total Daily Dosage                              | 1000 mg once oral         | 20 mg daily oral          |                           |
| End (months from initial diagnosis)             | //                        | 1                         |                           |
| <b>Surgery</b>                                  |                           |                           |                           |
| <b>Surgery 1</b>                                |                           |                           |                           |
| Date of Surgery (months from initial diagnosis) | 0                         | 0                         | 0                         |
| Gliadel                                         | //                        | No                        | No                        |
| Awake mapping                                   | //                        | No                        | No                        |
| Stealth scan                                    | //                        | No                        | Yes                       |
| <b>Tissue Diagnosis</b>                         |                           |                           |                           |
| <b>Tissue 1</b>                                 |                           |                           |                           |
| Serial Number                                   | W53-1-1, SN331            | W54-1-1, SN347            | W55-1-1, SN357            |
| Diagnosis                                       | Glioblastoma WHO grade IV | Glioblastoma WHO grade IV | Glioblastoma WHO grade IV |
| Location                                        | Left Temporal             | Left Temporal             | Right Temporal            |
| Extent                                          | Complete resection        | Complete resection        | Complete resection        |
| MRI confirmation                                | Yes                       | //                        | Yes                       |
| <b>Chemotherapy</b>                             |                           |                           |                           |
| <b>Medication 1</b>                             |                           |                           |                           |
| Drug Name                                       | Temozolomide              | //                        | //                        |
| Start (months from initial diagnosis)           | 1                         |                           |                           |
| Dosage                                          | 140mg                     |                           |                           |
| End (months from initial diagnosis)             | 2                         |                           |                           |
| Description                                     | daily oral                |                           |                           |
| <b>Medication 2</b>                             |                           |                           |                           |
| Drug Name                                       | Temozolomide              |                           |                           |
| Start (months from initial diagnosis)           | 4                         |                           |                           |
| Dosage                                          | 340mg                     |                           |                           |
| End (months from initial diagnosis)             | 9                         |                           |                           |



|                                       |                               |    |         |
|---------------------------------------|-------------------------------|----|---------|
| Description                           | every 2 weeks for 5 days oral |    |         |
| <b>Medication 3</b>                   |                               |    |         |
| Drug Name                             | Temozolomide                  |    |         |
| Start (months from initial diagnosis) | 9                             |    |         |
| Dosage                                | 140mg                         |    |         |
| End (months from initial diagnosis)   | 10                            |    |         |
| Description                           | everyday for 21 days oral     |    |         |
| <b>Medication 4</b>                   |                               |    |         |
| Drug Name                             | Etoposide                     |    |         |
| Start (months from initial diagnosis) | 12                            |    |         |
| Dosage                                | 100mg                         |    |         |
| End (months from initial diagnosis)   | 19                            |    |         |
| Description                           | daily oral                    |    |         |
| <b>Medication 5</b>                   |                               |    |         |
| Drug Name                             | Etoposide                     |    |         |
| Start (months from initial diagnosis) | 19                            |    |         |
| Dosage                                | 100mg                         |    |         |
| End (months from initial diagnosis)   | 22                            |    |         |
| Description                           | daily oral                    |    |         |
| <b>Medication 6</b>                   |                               |    |         |
| Drug Name                             | Etoposide                     |    |         |
| Start (months from initial diagnosis) | 22                            |    |         |
| Dosage                                | 100mg                         |    |         |
| End (months from initial diagnosis)   | 22                            |    |         |
| Description                           | daily oral                    |    |         |
| <b>Radiation Therapy</b>              |                               |    |         |
| <b>Medication 1</b>                   |                               |    |         |
| Type                                  | IMRT                          | // | IMRT    |
| Start (months from initial diagnosis) | 1                             |    | 0       |
| Dosage                                | 4600cGy                       |    | 4500cGy |
| End (months from initial diagnosis)   | 2                             |    | 2       |

|                                                |                                              |                           |                           |
|------------------------------------------------|----------------------------------------------|---------------------------|---------------------------|
| Description                                    | to the temporal lobe tumor bed               |                           | GBM                       |
| Fraction                                       | 23                                           |                           | 25                        |
| <b>Medication 2</b>                            |                                              |                           |                           |
| Type                                           | IMRT                                         |                           | IMRT                      |
| Start (months from initial diagnosis)          | 2                                            |                           | 2                         |
| Dosage                                         | 1400cGy                                      |                           | 1620cGy                   |
| End (months from initial diagnosis)            | 2                                            |                           | 2                         |
| Description                                    | Boost                                        |                           | GBM boost                 |
| Fraction                                       | 7                                            |                           | 9                         |
| <b>Medication 3</b>                            |                                              |                           |                           |
| Type                                           | IMRT                                         |                           |                           |
| Start (months from initial diagnosis)          | 10                                           |                           |                           |
| Dosage                                         | 21Gy                                         |                           |                           |
| End (months from initial diagnosis)            | //                                           |                           |                           |
| Description                                    | L medial / inferior temporal lobe recurrence |                           |                           |
| Fraction                                       | 1 for medial, and 1 for inferior             |                           |                           |
| <b>Pathology</b>                               |                                              |                           |                           |
| <b>Surgery 1</b>                               |                                              |                           |                           |
| Date Of Report (months from initial diagnosis) | 0                                            | 0                         | 0                         |
| <b>Report</b>                                  |                                              |                           |                           |
| Location                                       | Tissue: W53-1-1, SN331                       | Tissue: W54-1-1, SN347    | Tissue: W55-1-1, SN357    |
| Histopathology                                 | Glioblastoma WHO grade IV                    | Glioblastoma WHO grade IV | Glioblastoma WHO grade IV |
| 1p19q_deletion                                 |                                              |                           |                           |
| EGFR                                           |                                              |                           |                           |
| PTEN                                           |                                              |                           |                           |
| MGMT PCR                                       |                                              | unmethylated              |                           |
| MGMT IHC                                       |                                              |                           |                           |
| MGMT MS-MLPA:R1                                | methylated (0.81)                            | methylated (0.47)         | methylated (0.30)         |
| MGMT MS-MLPA:R2                                | unmethylated (0.29)                          | unmethylated (0.15)       | unmethylated (0.12)       |
| MGMT MS-MLPA:R3                                | methylated (0.45)                            | unmethylated (0.04)       | methylated (0.67)         |

|                                               |                                                                                                    |                                                                                            |                                                                                                                                                                                                                                               |
|-----------------------------------------------|----------------------------------------------------------------------------------------------------|--------------------------------------------------------------------------------------------|-----------------------------------------------------------------------------------------------------------------------------------------------------------------------------------------------------------------------------------------------|
| IDH1 mutation                                 | wildtype                                                                                           | wildtype                                                                                   | wildtype                                                                                                                                                                                                                                      |
| EGFR vIII                                     | not detected                                                                                       | not detected                                                                               | detected-ACT+                                                                                                                                                                                                                                 |
| <b>Follow-up Clinic Visit</b>                 |                                                                                                    |                                                                                            |                                                                                                                                                                                                                                               |
| <b>Visit 1</b>                                |                                                                                                    |                                                                                            |                                                                                                                                                                                                                                               |
| Date of Visit (months from initial diagnosis) | 0                                                                                                  | 0                                                                                          | 0                                                                                                                                                                                                                                             |
| KPS                                           | 90                                                                                                 | 90                                                                                         | 100                                                                                                                                                                                                                                           |
| Mini Mental Status Exam Score                 |                                                                                                    |                                                                                            |                                                                                                                                                                                                                                               |
| History of seizures since last visit          | Yes                                                                                                | No                                                                                         | No                                                                                                                                                                                                                                            |
| Neurologic Deficit                            | Yes. Right leg weakness.                                                                           | No                                                                                         | No                                                                                                                                                                                                                                            |
| Symptoms Notes                                | Has undergone near gross total resection of a large left temporal GBM.                             | He began having severe headaches about 3 weeks ago. He was also having expressive aphasia. | Clinically he is without deficit, headaches, nor history of seizures.                                                                                                                                                                         |
| <b>Visit 2</b>                                |                                                                                                    |                                                                                            |                                                                                                                                                                                                                                               |
| Date of Visit (months from initial diagnosis) | 1                                                                                                  | 1                                                                                          | 0                                                                                                                                                                                                                                             |
| KPS                                           | 90                                                                                                 | 70                                                                                         | 100                                                                                                                                                                                                                                           |
| Mini Mental Status Exam Score                 |                                                                                                    |                                                                                            |                                                                                                                                                                                                                                               |
| History of seizures since last visit          | No                                                                                                 | No                                                                                         | No                                                                                                                                                                                                                                            |
| Neurologic Deficit                            | No                                                                                                 | Yes. Right-sided weakness.                                                                 | No                                                                                                                                                                                                                                            |
| Symptoms Notes                                | Has never had a seizure. Neurologic and general review of systems is otherwise negative in detail. | Continues to have stable expressive aphasia and right-sided weakness.                      | Clinically, he is doing quite well without neurologic deficit nor history of seizures. Has established care with local providers for both radiation and chemotherapy and will plan to transfer coordination for the DCVax study out of state. |
| <b>Visit 3</b>                                |                                                                                                    |                                                                                            |                                                                                                                                                                                                                                               |
| Date of Visit (months from initial diagnosis) | 3                                                                                                  |                                                                                            |                                                                                                                                                                                                                                               |
| KPS                                           | 100                                                                                                |                                                                                            |                                                                                                                                                                                                                                               |
| Mini Mental Status Exam Score                 |                                                                                                    |                                                                                            |                                                                                                                                                                                                                                               |

|                                               |                                                                                                                                                                                                                |  |  |
|-----------------------------------------------|----------------------------------------------------------------------------------------------------------------------------------------------------------------------------------------------------------------|--|--|
| History of seizures since last visit          | No                                                                                                                                                                                                             |  |  |
| Neurologic Deficit                            | No                                                                                                                                                                                                             |  |  |
| Symptoms Notes                                | He is doing well. We will move forward with adjuvant TMZ.                                                                                                                                                      |  |  |
| <b>Visit 4</b>                                |                                                                                                                                                                                                                |  |  |
| Date of Visit (months from initial diagnosis) | 4                                                                                                                                                                                                              |  |  |
| KPS                                           | 90                                                                                                                                                                                                             |  |  |
| Mini Mental Status Exam Score                 |                                                                                                                                                                                                                |  |  |
| History of seizures since last visit          | No                                                                                                                                                                                                             |  |  |
| Neurologic Deficit                            | No                                                                                                                                                                                                             |  |  |
| Symptoms Notes                                | Is doing well. He had no other problems with chemotherapy. He denies headaches or seizures.                                                                                                                    |  |  |
| <b>Visit 5</b>                                |                                                                                                                                                                                                                |  |  |
| Date of Visit (months from initial diagnosis) | 5                                                                                                                                                                                                              |  |  |
| KPS                                           | 90                                                                                                                                                                                                             |  |  |
| Mini Mental Status Exam Score                 |                                                                                                                                                                                                                |  |  |
| History of seizures since last visit          | No                                                                                                                                                                                                             |  |  |
| Neurologic Deficit                            | No                                                                                                                                                                                                             |  |  |
| Symptoms Notes                                | Had a migraine headache about two weeks ago which resolved with immitrex. One day prior to the migraine, he noted numbness in each of his finger tips which lasted about 10 minutes. He had no other symptoms. |  |  |
| <b>Visit 6</b>                                |                                                                                                                                                                                                                |  |  |
| Date of Visit (months from initial diagnosis) | 6                                                                                                                                                                                                              |  |  |

|                                               |                                                                                                                                                                        |  |  |
|-----------------------------------------------|------------------------------------------------------------------------------------------------------------------------------------------------------------------------|--|--|
| KPS                                           | 90                                                                                                                                                                     |  |  |
| Mini Mental Status Exam Score                 |                                                                                                                                                                        |  |  |
| History of seizures since last visit          | No                                                                                                                                                                     |  |  |
| Neurologic Deficit                            | No                                                                                                                                                                     |  |  |
| Symptoms Notes                                | He has had no headaches or seizures and no new neurologic deficits.                                                                                                    |  |  |
| <b>Visit 7</b>                                |                                                                                                                                                                        |  |  |
| Date of Visit (months from initial diagnosis) | 7                                                                                                                                                                      |  |  |
| KPS                                           | 100                                                                                                                                                                    |  |  |
| Mini Mental Status Exam Score                 |                                                                                                                                                                        |  |  |
| History of seizures since last visit          | No                                                                                                                                                                     |  |  |
| Neurologic Deficit                            | No                                                                                                                                                                     |  |  |
| Symptoms Notes                                | He continues to feel he is improving in terms of his cognitive function. He has no new neurologic concerns or complaints. He denies headaches and has had no seizures. |  |  |
| <b>Visit 8</b>                                |                                                                                                                                                                        |  |  |
| Date of Visit (months from initial diagnosis) | 9                                                                                                                                                                      |  |  |
| KPS                                           | 90                                                                                                                                                                     |  |  |
| Mini Mental Status Exam Score                 |                                                                                                                                                                        |  |  |
| History of seizures since last visit          | No                                                                                                                                                                     |  |  |
| Neurologic Deficit                            | No                                                                                                                                                                     |  |  |
| Symptoms Notes                                | No changes.                                                                                                                                                            |  |  |
| <b>Visit 9</b>                                |                                                                                                                                                                        |  |  |
| Date of Visit (months from initial diagnosis) | 10                                                                                                                                                                     |  |  |
| KPS                                           | 80                                                                                                                                                                     |  |  |
| Mini Mental Status Exam Score                 |                                                                                                                                                                        |  |  |
| History of seizures since last visit          | No                                                                                                                                                                     |  |  |
| Neurologic Deficit                            | No                                                                                                                                                                     |  |  |

|                                               |                                                                                                                                                                                                                                                                                                      |  |  |
|-----------------------------------------------|------------------------------------------------------------------------------------------------------------------------------------------------------------------------------------------------------------------------------------------------------------------------------------------------------|--|--|
| Symptoms Notes                                | Disease progression. Stop TMZ, move to radiosurgery of two lesions.                                                                                                                                                                                                                                  |  |  |
| <b>Visit 10</b>                               |                                                                                                                                                                                                                                                                                                      |  |  |
| Date of Visit (months from initial diagnosis) | 12                                                                                                                                                                                                                                                                                                   |  |  |
| KPS                                           | 70                                                                                                                                                                                                                                                                                                   |  |  |
| Mini Mental Status Exam Score                 |                                                                                                                                                                                                                                                                                                      |  |  |
| History of seizures since last visit          | Yes                                                                                                                                                                                                                                                                                                  |  |  |
| Neurologic Deficit                            | No                                                                                                                                                                                                                                                                                                   |  |  |
| Symptoms Notes                                | Two months ago he received gamma knife to a progressing nodular focus of enhancement along the medial aspect of the surgical cavity. He was doing well then developed worsening speech difficulties and right sided weakness. He otherwise denies headaches, seizures, or other neurologic deficits. |  |  |
| <b>Visit 11</b>                               |                                                                                                                                                                                                                                                                                                      |  |  |
| Date of Visit (months from initial diagnosis) | 14                                                                                                                                                                                                                                                                                                   |  |  |
| KPS                                           | 70                                                                                                                                                                                                                                                                                                   |  |  |
| Mini Mental Status Exam Score                 |                                                                                                                                                                                                                                                                                                      |  |  |
| History of seizures since last visit          | No                                                                                                                                                                                                                                                                                                   |  |  |
| Neurologic Deficit                            | No                                                                                                                                                                                                                                                                                                   |  |  |

|                                               |                                                                                                                                                                                                                                                                                            |  |  |
|-----------------------------------------------|--------------------------------------------------------------------------------------------------------------------------------------------------------------------------------------------------------------------------------------------------------------------------------------------|--|--|
| Symptoms Notes                                | <p>Has been working with PT and has had improvement in right sided strength. He is more fatigued since starting VP16 and weakness is more pronounced with fatigue. He denies nausea. He otherwise has no new concerns. He denies headaches. He has had no new or progressive symptoms.</p> |  |  |
| <b>Visit 12</b>                               |                                                                                                                                                                                                                                                                                            |  |  |
| Date of Visit (months from initial diagnosis) | 15                                                                                                                                                                                                                                                                                         |  |  |
| KPS                                           | 70                                                                                                                                                                                                                                                                                         |  |  |
| Mini Mental Status Exam Score                 |                                                                                                                                                                                                                                                                                            |  |  |
| History of seizures since last visit          | No                                                                                                                                                                                                                                                                                         |  |  |
| Neurologic Deficit                            | No                                                                                                                                                                                                                                                                                         |  |  |
| Symptoms Notes                                | <p>Has now completed three cycles of VP 16 which he is tolerating with minimal side effects other than fatigue. He feels both his speech and right sided strength are improving although right hand and arm remain weak. He continues to take Plavix daily for stroke prevention.</p>      |  |  |
| <b>Visit 13</b>                               |                                                                                                                                                                                                                                                                                            |  |  |
| Date of Visit (months from initial diagnosis) | 16                                                                                                                                                                                                                                                                                         |  |  |
| KPS                                           | 70                                                                                                                                                                                                                                                                                         |  |  |
| Mini Mental Status Exam Score                 |                                                                                                                                                                                                                                                                                            |  |  |
| History of seizures since last visit          | No                                                                                                                                                                                                                                                                                         |  |  |
| Neurologic Deficit                            | No                                                                                                                                                                                                                                                                                         |  |  |

|                                               |                                                                                                                                                                                                                                                                                                                                                                             |  |  |
|-----------------------------------------------|-----------------------------------------------------------------------------------------------------------------------------------------------------------------------------------------------------------------------------------------------------------------------------------------------------------------------------------------------------------------------------|--|--|
| Symptoms Notes                                | <p>MRI showed increased enhancement along the previously treated gamma knife region. Recommended patient start Etoposide in the event the enhancement reflects tumor progression.</p> <p>He has now completed 4 cycles which he is tolerating well with his only complaint being fatigue. He denies headaches and has had no seizures. Strength and balance are stable.</p> |  |  |
| <b>Visit 14</b>                               |                                                                                                                                                                                                                                                                                                                                                                             |  |  |
| Date of Visit (months from initial diagnosis) | 17                                                                                                                                                                                                                                                                                                                                                                          |  |  |
| KPS                                           | 70                                                                                                                                                                                                                                                                                                                                                                          |  |  |
| Mini Mental Status Exam Score                 |                                                                                                                                                                                                                                                                                                                                                                             |  |  |
| History of seizures since last visit          | No                                                                                                                                                                                                                                                                                                                                                                          |  |  |
| Neurologic Deficit                            | No                                                                                                                                                                                                                                                                                                                                                                          |  |  |
| Symptoms Notes                                | Doing well clinically and radiographically.                                                                                                                                                                                                                                                                                                                                 |  |  |
| <b>Visit 15</b>                               |                                                                                                                                                                                                                                                                                                                                                                             |  |  |
| Date of Visit (months from initial diagnosis) | 18                                                                                                                                                                                                                                                                                                                                                                          |  |  |
| KPS                                           | 70                                                                                                                                                                                                                                                                                                                                                                          |  |  |
| Mini Mental Status Exam Score                 |                                                                                                                                                                                                                                                                                                                                                                             |  |  |
| History of seizures since last visit          | No                                                                                                                                                                                                                                                                                                                                                                          |  |  |
| Neurologic Deficit                            | No                                                                                                                                                                                                                                                                                                                                                                          |  |  |
| Symptoms Notes                                | Is doing okay, no new concerns or complaints.                                                                                                                                                                                                                                                                                                                               |  |  |
| <b>Visit 16</b>                               |                                                                                                                                                                                                                                                                                                                                                                             |  |  |
| Date of Visit (months from initial diagnosis) | 19                                                                                                                                                                                                                                                                                                                                                                          |  |  |



|                                               |                                                                                                                                                                       |  |  |
|-----------------------------------------------|-----------------------------------------------------------------------------------------------------------------------------------------------------------------------|--|--|
| KPS                                           | 70                                                                                                                                                                    |  |  |
| Mini Mental Status Exam Score                 |                                                                                                                                                                       |  |  |
| History of seizures since last visit          | No                                                                                                                                                                    |  |  |
| Neurologic Deficit                            | No                                                                                                                                                                    |  |  |
| Symptoms Notes                                | Alert, fluent, grip improved, gait ok. Neuroimaging from today reviewed in clinic: stable. Doing well clinically and radiographically. Two additional cycles of VP16. |  |  |
| <b>Visit 17</b>                               |                                                                                                                                                                       |  |  |
| Date of Visit (months from initial diagnosis) | 21                                                                                                                                                                    |  |  |
| KPS                                           | 70                                                                                                                                                                    |  |  |
| Mini Mental Status Exam Score                 |                                                                                                                                                                       |  |  |
| History of seizures since last visit          | No                                                                                                                                                                    |  |  |
| Neurologic Deficit                            | No                                                                                                                                                                    |  |  |
| Symptoms Notes                                | //                                                                                                                                                                    |  |  |
| <b>Visit 18</b>                               |                                                                                                                                                                       |  |  |
| Date of Visit (months from initial diagnosis) | 22                                                                                                                                                                    |  |  |
| KPS                                           | 70                                                                                                                                                                    |  |  |
| Mini Mental Status Exam Score                 |                                                                                                                                                                       |  |  |
| History of seizures since last visit          | No                                                                                                                                                                    |  |  |
| Neurologic Deficit                            | No                                                                                                                                                                    |  |  |
| Symptoms Notes                                | No new problems, he thinks his arm is still slowly improving.                                                                                                         |  |  |
| <b>Visit 19</b>                               |                                                                                                                                                                       |  |  |
| Date of Visit (months from initial diagnosis) | 23                                                                                                                                                                    |  |  |
| KPS                                           |                                                                                                                                                                       |  |  |
| Mini Mental Status Exam Score                 |                                                                                                                                                                       |  |  |

|                                      |                  |       |       |
|--------------------------------------|------------------|-------|-------|
| History of seizures since last visit | No               |       |       |
| Neurologic Deficit                   | No               |       |       |
| Symptoms Notes                       | Follow-up visit. |       |       |
| <b>Clinical Trials</b>               |                  |       |       |
| 1                                    | //               | DCVax | DCVax |

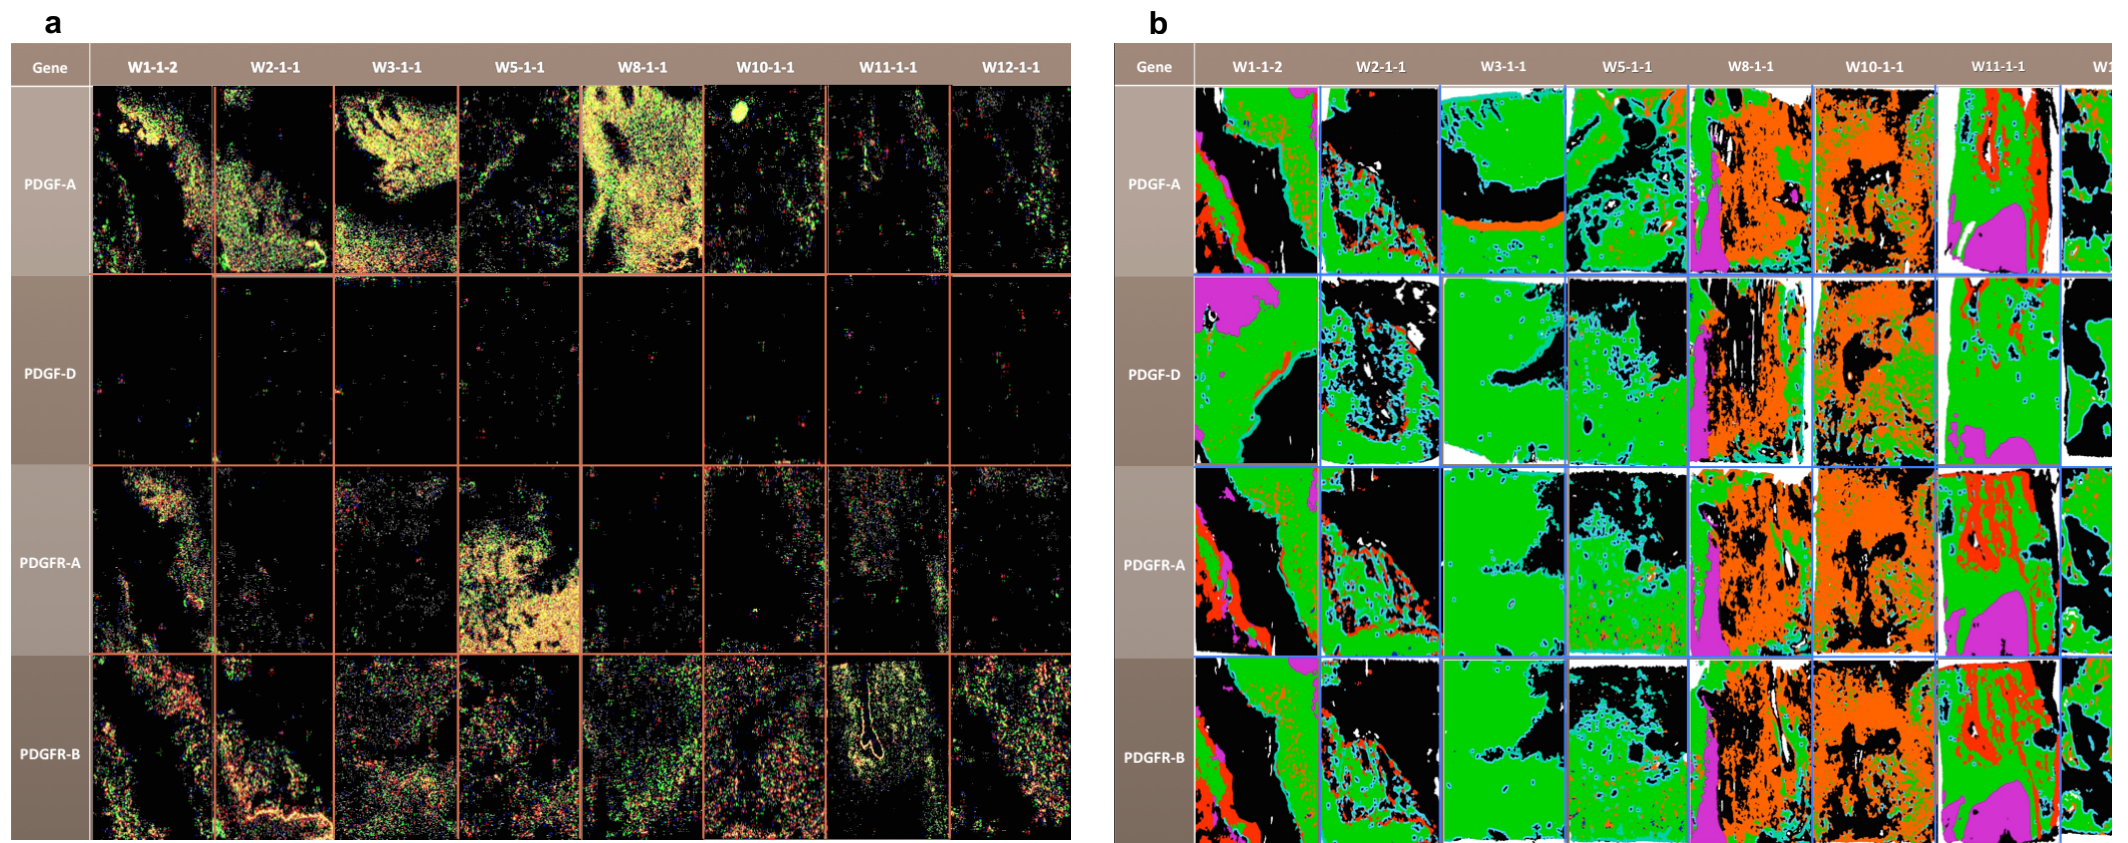

**Supplementary Figure S1: Illustrative panels of probe specific hybridization for each PDGF gene based on microarray analysis and the correspondent Glioblastoma Multiforme (GBM) regions annotation. (a)** Compilation of images of probe specific hybridization for PDGFA, PDGFD, PDGFRA and PDGFRB genes in GBM tissue sections of eight of the adult human donors included in this study (W1-1-2, W2-1-1, W3-1-1, W5-1-1, W8-1-1, W10-1-1, W11-1-1 and W12-1-1). *PDGFRB* images stand out in comparison to the other genes data as the expression appears to be more intense and to comprise wider areas of the tissue section in all donors samples. Images of *PDGFD* expression show a peculiar shape: expression loci appear as separate points, whereas the other genes expression patterns show large blocks of close expression loci; **(b)** Correspondent tissue sections with annotation of the GBM regions analysed in this study: Infiltrating Tumour (in purple), Cellular Tumour (in green), Perinecrotic Zone (in blue), Hyperplastic Blood Vessels in Cellular Tumour (in orange), Microvascular Proliferation (in red). It is not possible to visually observe specific patterns of the PDGF genes expression in each region. All data is available online on the Ivy Glioblastoma Atlas Project website [[glioblastoma.alleninstitute.org/rnaseq/search/index.html](http://glioblastoma.alleninstitute.org/rnaseq/search/index.html)].

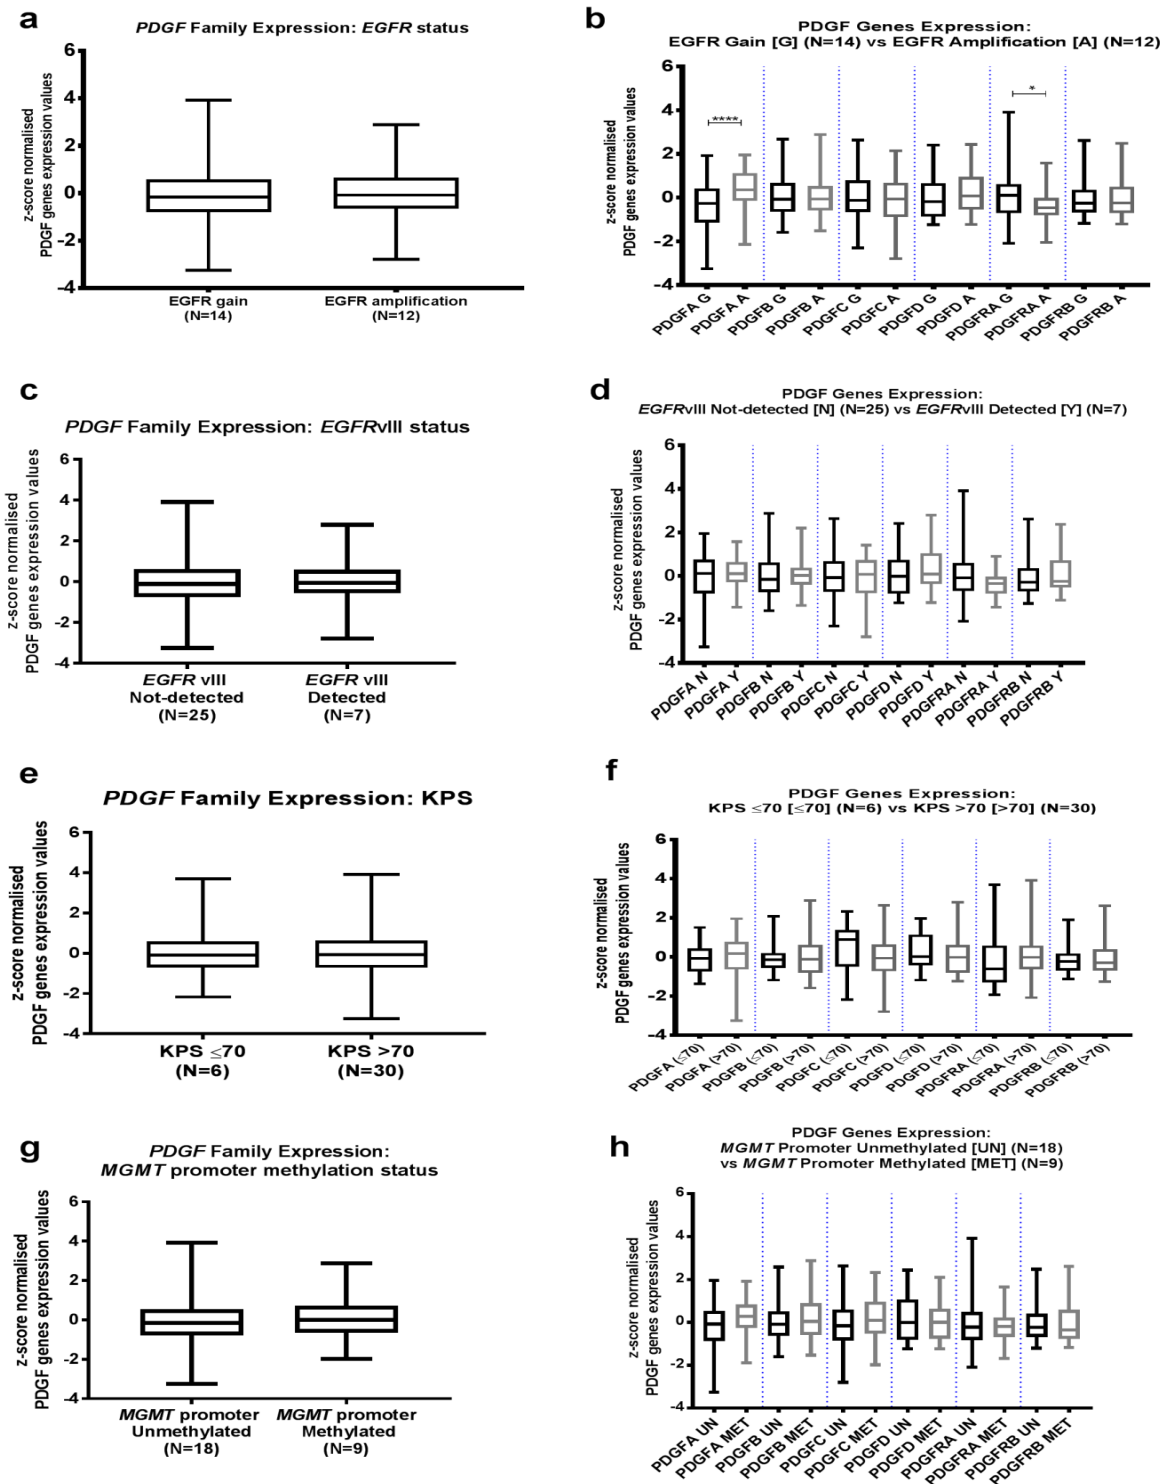

**Supplementary Figure S2: Analysis of PDGF family expression in relation to genomic and clinical factors.** No significant differential *PDGF* expression was observed as to Epidermal Growth Factor Receptor (*EGFR*) gene status (**a**, **b**), presence or absence of the *EGFR*VIII mutation (**c**, **d**), Karnofsky Performance Status score (**e**, **f**) or methylation status of O<sup>6</sup>-methylguanine-DNA-methyltransferase (*MGMT*) gene promoter (**g**, **h**). Data available online on the Ivy Glioblastoma Atlas Project website [[glioblastoma.alleninstitute.org/rnaseq/search/index.html](http://glioblastoma.alleninstitute.org/rnaseq/search/index.html)] and Ivy GAP Clinical and Genomic Database [[ivygap.swedish.org/home](http://ivygap.swedish.org/home)].
